# Supplementary material
Source: publisher figshare collection journal article supplement (https://acs.figshare.com/ndownloader/files/3948127)
Supplement: Supplementary file 1 [file 3948127]

## Supporting Information

# Asymmetric Synthesis of *P*-Stereogenic Diarylphosphinites by Palladium-Catalyzed Enantioselective Addition of Diarylphosphines to Benzoquinones

Yinhua Huang,<sup>†,‡</sup> Yongxin Li,<sup>†</sup> Pak-Hing Leung,<sup>\*,†</sup> and Tamio Hayashi<sup>\*,‡,§</sup>

<sup>†</sup>Division of Chemistry and Biological Chemistry, School of Physical and Mathematical Sciences, Nanyang Technological University, Singapore 637371, Singapore

<sup>‡</sup>Department of Chemistry, National University of Singapore, 3 Science Drive 3, Singapore 117543, Singapore

<sup>§</sup>Institute of Materials Research and Engineering, A\*STAR, 3 Research Link, Singapore 117602, Singapore

Email: pakhing@ntu.edu.sg ; tamioh@imre.a-star.edu.sg; chmtamh@nus.edu.sg

## Contents of Supporting Information:

|                                                                                                                                |     |
|--------------------------------------------------------------------------------------------------------------------------------|-----|
| 1. General information                                                                                                         | S2  |
| 2. Materials                                                                                                                   | S2  |
| 3. Preparation of racemic secondary phosphines Ar <sup>1</sup> Ar <sup>2</sup> PH                                              | S3  |
| 4. Palladium-catalyzed asymmetric addition of Ph(Mes)PH ( <b>1a</b> ) to 2,5-diphenyl-1,4-benzoquinone ( <b>2m</b> ) (Table 1) | S7  |
| 5. Palladium-catalyzed asymmetric addition of diarylphosphine <b>1</b> to benzoquinone <b>2m</b> (Table 2)                     | S8  |
| 6. Determination of the absolute configuration of phosphinite <b>3am</b>                                                       | S8  |
| 7. A typical procedure for the preparation of racemic <b>4</b> and <b>5</b>                                                    | S9  |
| 8. Characterization of the products <b>4</b> and <b>5</b>                                                                      | S10 |
| 9. Addition of Ph <sub>2</sub> PH to 2,5- diphenyl -1,4-benzoquinone ( <b>2m</b> )                                             | S16 |
| 10. Studies on kinetic resolution                                                                                              | S17 |
| 11. Transformations of the products, ( <i>S</i> )- <b>3am</b> , ( <i>R</i> )- <b>4am</b> , and ( <i>S</i> )- <b>5am</b>        | S18 |
| 12. References                                                                                                                 | S22 |
| 13. Single Crystal X-Ray Diffraction Data                                                                                      | S23 |
| 14. <sup>31</sup> P{ <sup>1</sup> H}, <sup>1</sup> H, <sup>13</sup> C NMR spectra and chiral HPLC charts                       | S29 |

## 1. General information

All air-sensitive manipulations were carried out with standard Schlenk techniques under nitrogen or argon. Solvents were degassed prior to use when necessary. Low Temp PAIRSTIRRER PSL-1800 machine was used for controlling temperatures for the reactions. Column chromatography was conducted on Silica gel 60 (Merck). NMR spectra are recorded on Bruker ACF-300 spectrometer (300 MHz for  $^1\text{H}$ , 75 MHz for  $^{13}\text{C}$ , and 121 MHz for  $^{31}\text{P}$ ), ACF-400 spectrometer (400 MHz for  $^1\text{H}$ , 100 MHz for  $^{13}\text{C}$ , and 162 MHz for  $^{31}\text{P}$ ), and ACF-500 spectrometer (500 MHz for  $^1\text{H}$ , 125 MHz for  $^{13}\text{C}$ , and 202 MHz for  $^{31}\text{P}$ ). Chemical shifts are reported in  $\delta$  (ppm) referenced to an internal  $\text{SiMe}_4$  standard ( $\delta = 0$  ppm) for  $^1\text{H}$  NMR, chloroform- $d$  ( $\delta = 77.23$  ppm) for  $^{13}\text{C}$  NMR, and to an external 85%  $\text{H}_3\text{PO}_4$  ( $\delta = 0$  ppm) standard for  $^{31}\text{P}$  NMR. The following abbreviations were used; s: singlet, d: doublet, t: triplet, q: quartet, m: multiplet, br: broad. Optical rotations were measured on a Perkin-Elmer 341 polarimeter, and an ATAGO AP-300 polarimeter. HRMS(ESI) were recorded on a time-of-flight (TOF) LC/MS instrument.

## 2. Materials

The commercially available solvents and chemicals listed below were used as received for the reaction without further purification: degassed dichloromethane (Alfa), degassed chloroform (Alfa), degassed THF (Alfa), degassed MeCN (Alfa), quinones **2m** (CAS:844-51-9) (Aldrich), **2n** (CAS:137-18-8) (Aldrich), **2o** (CAS:106-51-4) (Aldrich), and **2p** (CAS:615-93-0) (Aldrich).

Complex PdL1\* (CAS:1335292-75-5)<sup>1</sup> and PdL2\* (CAS:142216-18-0)<sup>2</sup> were prepared according to the reported procedures.

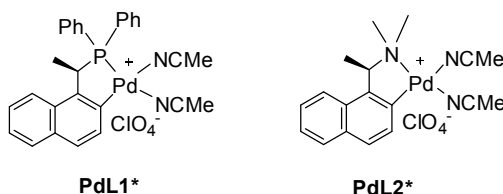

**Caution!** Perchlorate salts of metal complexes are potentially explosive compounds and should be handled with care.

### 3. Preparation of racemic secondary phosphines $\text{Ar}^1\text{Ar}^2\text{PH}$

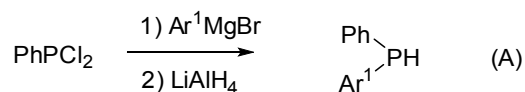

The racemic secondary phosphines **1a** (CAS: 217975-66-1),<sup>3</sup> **1b**, **1c**, **1d**, **1e**, **1f** (CAS: 141868-58-8),<sup>4</sup> **1g** (CAS: 179117-27-2)<sup>5</sup> were prepared according to reported procedure<sup>5</sup> with modifications (**eq A**). A typical procedure for the synthesis of **1a** is shown below.

To a solution of  $\text{PhPCl}_2$  (4.49 g, 25.1 mmol) in THF (50 mL) was added slowly  $\text{MesMgBr}$  (25.1 mmol in 50 mL of THF, prepared from  $\text{MesBr}$  (5.00 g, 25.1 mmol) and  $\text{Mg}$  (0.72 g, 30.1 mmol) in 50 mL of THF) ( $\text{Mes} = 2,4,6\text{-Me}_3\text{C}_6\text{H}_2$ ) at  $-80^\circ\text{C}$  under  $\text{N}_2$ , and the mixture was stirred at  $-80^\circ\text{C}$  for 2 h before it was warmed to room temperature and stirred for another 2 h. The mixture was cooled to  $0^\circ\text{C}$  and  $\text{LiAlH}_4$  (1.14 g, 30.1 mmol) was added slowly. The mixture was kept stirring at room temperature for 2 h. Degassed water (10 mL) was added dropwise at  $0^\circ\text{C}$  and the mixture was extracted with ether (40 mL  $\times$  3). The organic layer was combined and dried over  $\text{MgSO}_4$ . The solvent was removed by distillation and the residue was subjected to high vacuum microdistillation to give  $\text{Ph}(\text{Mes})\text{PH}$  (**1a**) (4.30 g, 75%).

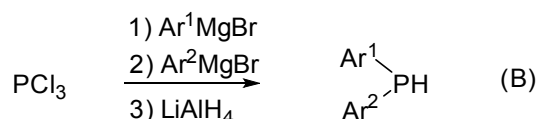

The racemic secondary phosphines **1h** and **1i** were prepared similarly with modifications (**eq B**). A typical procedure for the synthesis of **1h** is shown below.

To a solution of  $\text{PCl}_3$  (2.07 g, 15.1 mmol) in THF (40 mL) was added slowly  $\text{MesMgBr}$  (15.1 mmol in 40 mL of THF, prepared from  $\text{MesBr}$  (3.00 g, 15.1 mmol) and  $\text{Mg}$  (0.43 g, 18.1 mmol) in 40 mL of THF) at  $-80^\circ\text{C}$  under  $\text{N}_2$ , and the mixture was stirred at  $-80^\circ\text{C}$  for 2 h.  $4\text{-MeC}_6\text{H}_4\text{MgBr}$  (15.1 mmol in 40 mL of THF, prepared from  $4\text{-MeC}_6\text{H}_4\text{Br}$  (2.58 g, 15.1 mmol) and  $\text{Mg}$  (0.43 g, 18.1 mmol) in 40 mL of THF) was added dropwise, and the mixture was stirred at  $-80^\circ\text{C}$  for 2 h before it was warmed to room temperature and stirred for another 2 h. The mixture was cooled to  $0^\circ\text{C}$  and  $\text{LiAlH}_4$  (0.69 g, 18.1 mol) was added slowly. The mixture was kept stirring at room temperature for 2 h. Degassed water (10 mL) was added dropwise at  $0^\circ\text{C}$  and the mixture was extracted with ether (40 mL  $\times$  3). The combined organic layer was dried over  $\text{MgSO}_4$ . The solvent was removed by distillation and the residue

was subjected to high vacuum microdistillation to give (4-MeC<sub>6</sub>H<sub>4</sub>)(Mes)PH (**1h**) (1.57 g, 43%).

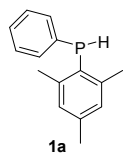

**Compound 1a** (CAS: 217975-66-1)<sup>3</sup> was prepared by the reaction of 2,4,6-Me<sub>3</sub>C<sub>6</sub>H<sub>2</sub>MgBr with PhPCl<sub>2</sub> followed by reduction with LiAlH<sub>4</sub> according to the typical procedure (eq A) (75% yield). <sup>31</sup>P{<sup>1</sup>H} NMR (CDCl<sub>3</sub>, 202 MHz) δ -76.6. <sup>1</sup>H NMR (CDCl<sub>3</sub>, 500 MHz) δ 2.29 (s, 3H), 2.40 (s, 6H), 4.70-5.90 (br s, 1H), 6.94 (s, 2H), 7.19-7.28 (m, 5H).

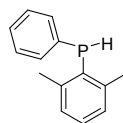

**Compound 1b** was prepared by the reaction of 2,6-Me<sub>2</sub>C<sub>6</sub>H<sub>3</sub>MgBr with PhPCl<sub>2</sub> followed by reduction with LiAlH<sub>4</sub> according to the typical procedure (eq A) (78% yield). <sup>31</sup>P{<sup>1</sup>H} NMR (CDCl<sub>3</sub>, 162 MHz) δ -76.0. <sup>1</sup>H NMR (CDCl<sub>3</sub>, 400 MHz) δ 2.43 (s, 6H), 5.39 (d, *J*<sub>HP</sub> = 223.5 Hz, 1H), 7.09 (d, *J*<sub>HH</sub> = 7.4 Hz, 2H), 7.18 (t, *J*<sub>HH</sub> = 7.9 Hz, 1H), 7.19-7.29 (m, 5H). <sup>13</sup>C NMR (CDCl<sub>3</sub>, 100 MHz) δ 23.4 (d, *J*<sub>CP</sub> = 11.5 Hz, 2C), 128.0 (s, 1C), 128.3 (d, *J*<sub>CP</sub> = 3.1 Hz, 2C), 128.6 (d, *J*<sub>CP</sub> = 6.0 Hz, 2C), 129.2 (s, 1C), 132.2 (d, *J*<sub>CP</sub> = 12.1 Hz, 1C), 132.4 (d, *J*<sub>CP</sub> = 16.4 Hz, 2C), 134.2 (d, *J*<sub>CP</sub> = 12.6 Hz, 1C), 143.1 (d, *J*<sub>CP</sub> = 12.4 Hz, 2C). HRMS (ESI) calcd for C<sub>14</sub>H<sub>16</sub>P [M+H]<sup>+</sup> 215.0991, found 215.0990.

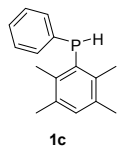

**Compound 1c** was prepared by the reaction of 2,3,5,6-Me<sub>4</sub>C<sub>6</sub>H<sub>2</sub>MgBr with PhPCl<sub>2</sub> followed by reduction with LiAlH<sub>4</sub> according to the typical procedure (eq A) (68% yield). <sup>31</sup>P{<sup>1</sup>H} NMR (CDCl<sub>3</sub>, 121 MHz) δ -72.2. <sup>1</sup>H NMR (CDCl<sub>3</sub>, 300 MHz) δ 2.24 (s, 6H), 2.36 (s, 6H), 5.45 (d, *J*<sub>HP</sub> = 222.2 Hz, 1H), 7.01 (s, 1H), 7.18-7.27 (m, 5H). <sup>13</sup>C NMR (CDCl<sub>3</sub>, 75 MHz) δ 19.5 (d, *J*<sub>CP</sub> = 14.6 Hz, 2C), 20.9 (d, *J*<sub>CP</sub> = 0.9 Hz, 2C), 127.7 (s, 1C), 128.5 (d, *J*<sub>CP</sub> = 5.6 Hz, 2C), 132.1 (d, *J*<sub>CP</sub> = 16.2 Hz, 2C), 132.3 (d, *J*<sub>CP</sub> = 10.7 Hz, 1C), 133.2 (s, 1C), 134.2 (d, *J*<sub>CP</sub> = 3.7 Hz, 2C), 135.2 (d, *J*<sub>CP</sub> = 13.2 Hz, 1C), 139.0 (d, *J*<sub>CP</sub> = 12.5 Hz, 2C). HRMS (ESI) calcd for C<sub>16</sub>H<sub>20</sub>P [M+H]<sup>+</sup> 243.1306, found 243.1303.

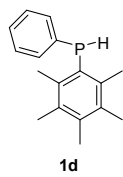

**Compound 1d** was prepared by the reaction of 2,3,4,5,6-Me<sub>5</sub>C<sub>6</sub>MgBr with PhPCl<sub>2</sub>

followed by reduction with LiAlH<sub>4</sub> according to the typical procedure (eq A) (65% yield). <sup>31</sup>P{<sup>1</sup>H} NMR (CDCl<sub>3</sub>, 162 MHz) δ -69.9. <sup>1</sup>H NMR (CDCl<sub>3</sub>, 300 MHz) δ 2.24 (s, 6H), 2.27 (s, 3H), 2.44 (s, 6H), 5.46 (d, *J*<sub>HP</sub> = 219.4 Hz, 1H), 7.19-7.24 (m, 5H). <sup>13</sup>C NMR (CDCl<sub>3</sub>, 100 MHz) δ 17.4 (s, 3C), 20.8 (d, *J*<sub>CP</sub> = 15.6 Hz, 2C), 127.5 (s, 1C), 128.5 (d, *J*<sub>CP</sub> = 5.5 Hz, 2C), 129.2 (d, *J*<sub>CP</sub> = 9.3 Hz, 1C), 131.9 (d, *J*<sub>CP</sub> = 15.6 Hz, 2C), 133.2 (d, *J*<sub>CP</sub> = 3.5 Hz, 2C), 135.8 (d, *J*<sub>CP</sub> = 13.7 Hz, 1C), 136.8 (s, 1C), 138.8 (d, *J*<sub>CP</sub> = 12.3 Hz, 2C). HRMS (ESI) calcd for C<sub>17</sub>H<sub>22</sub>P [M+H]<sup>+</sup> 257.1462, found 257.1459.

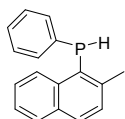

**1e**

**Compound 1e** was prepared by the reaction of 2-Me-1-naphthylMgBr with PhPCl<sub>2</sub> followed by reduction with LiAlH<sub>4</sub> according to the typical procedure (eq A) (53% yield). <sup>31</sup>P{<sup>1</sup>H} NMR (CDCl<sub>3</sub>, 202 MHz) δ -79.6. <sup>1</sup>H NMR (CDCl<sub>3</sub>, 500 MHz) δ 2.68 (s, 3H), 5.68 (d, *J*<sub>HP</sub> = 223.1 Hz, 1H), 7.16-7.19 (m, 3H), 7.22-7.26 (m, 2H), 7.37-7.46 (m, 3H), 7.80 (d, *J* = 8.4 Hz, 2H), 8.42 (d, *J* = 8.0 Hz, 1H). <sup>13</sup>C NMR (CDCl<sub>3</sub>, 125 MHz) δ 24.0 (d, *J*<sub>CP</sub> = 13.2 Hz, 1C), 125.2 (s, 1C), 126.9 (s, 1C), 126.9 (d, *J*<sub>CP</sub> = 15.9 Hz, 1C), 127.8 (s, 1C), 128.5 (d, *J*<sub>CP</sub> = 12.8 Hz, 1C), 128.6 (d, *J*<sub>CP</sub> = 5.5 Hz, 2C), 128.8 (s, 1C), 129.3 (d, *J*<sub>CP</sub> = 3.8 Hz, 1C), 130.2 (s, 1C), 132.1 (d, *J*<sub>CP</sub> = 16.3 Hz, 2C), 132.5 (d, *J*<sub>CP</sub> = 3.3 Hz, 1C), 134.8 (d, *J*<sub>CP</sub> = 12.0 Hz, 1C), 136.4 (d, *J*<sub>CP</sub> = 10.8 Hz, 1C), 142.8 (d, *J*<sub>CP</sub> = 13.3 Hz, 1C). HRMS (ESI) calcd for C<sub>17</sub>H<sub>16</sub>P [M+H]<sup>+</sup> 251.0993, found 251.0990.

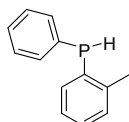

**1f**

**Compound 1f** (CAS: 141868-58-8)<sup>4</sup> was prepared by the reaction of 2-MeC<sub>6</sub>H<sub>4</sub>MgBr with PhPCl<sub>2</sub> followed by reduction with LiAlH<sub>4</sub> according to the typical procedure (eq A) (78% yield). <sup>31</sup>P{<sup>1</sup>H} NMR (CDCl<sub>3</sub>, 202 MHz) δ -48.7. <sup>1</sup>H NMR (CDCl<sub>3</sub>, 500 MHz) δ 2.37 (s, 3H), 5.18 (d, *J*<sub>HP</sub> = 220.9 Hz, 1H), 7.12 (t, *J*<sub>HH</sub> = *J*<sub>HP</sub> = 7.3 Hz, 1H), 7.17 (dd, *J* = 7.5 Hz, 3.5 Hz, 1H), 7.23 (td, *J* = 7.5 Hz, 1.0 Hz, 1H), 7.28-7.31 (m, 3H), 7.35 (t, *J* = 7.5 Hz, 1H), 7.40-7.45 (m, 2H).

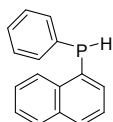

**1g**

**Compound 1g** (CAS: 179117-27-2)<sup>5</sup> was prepared by the reaction of 1-naphthylMgBr with PhPCl<sub>2</sub> followed by reduction with LiAlH<sub>4</sub> according to the typical procedure (eq A) (48% yield). <sup>31</sup>P{<sup>1</sup>H} NMR (CDCl<sub>3</sub>, 202 MHz) δ -50.3. <sup>1</sup>H NMR (CDCl<sub>3</sub>,

500 MHz)  $\delta$  5.51 (d,  $J_{\text{HP}} = 221.6$  Hz, 1H), 7.24-7.28 (m, 3H), 7.43-7.49 (m, 5H), 7.80-7.85 (m, 3H), 8.23-8.25 (m, 1H).

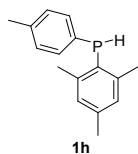

**Compound 1h** was prepared by the reaction of MesMgBr, 4-MeC<sub>6</sub>H<sub>4</sub>MgBr and PCl<sub>3</sub> followed by reduction with LiAlH<sub>4</sub> according to the typical procedure (eq B) (43% yield). <sup>31</sup>P{<sup>1</sup>H} NMR (CDCl<sub>3</sub>, 162 MHz)  $\delta$  -77.6. <sup>1</sup>H NMR (CDCl<sub>3</sub>, 400 MHz)  $\delta$  2.28 (s, 6H), 2.39 (s, 6H), 5.33 (d,  $J_{\text{HP}} = 223.2$  Hz, 1H), 6.92 (s, 2H), 7.03 (d,  $J = 7.6$  Hz, 2H), 7.15 (t,  $J = 7.8$  Hz, 2H). <sup>13</sup>C NMR (CDCl<sub>3</sub>, 100 MHz)  $\delta$  21.3 (s, 1C), 21.4 (s, 1C), 23.3 (d,  $J_{\text{CP}} = 11.5$  Hz, 2C), 128.9 (d,  $J_{\text{CP}} = 10.8$  Hz, 1C), 129.2 (d,  $J_{\text{CP}} = 3.5$  Hz, 2C), 129.4 (d,  $J_{\text{CP}} = 6.2$  Hz, 2C), 132.5 (d,  $J_{\text{CP}} = 16.7$  Hz, 2C), 134.1 (d,  $J_{\text{CP}} = 17.1$  Hz, 1C), 137.8 (s, 1C), 138.9 (s, 1C), 142.9 (d,  $J_{\text{CP}} = 12.6$  Hz, 2C). HRMS (ESI) calcd for C<sub>16</sub>H<sub>20</sub>P [M+H]<sup>+</sup> 243.1304, found 243.1303.

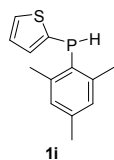

**Compound 1i** was prepared by the reaction of MesMgBr, 2-thienylMgBr, and PCl<sub>3</sub> followed by reduction with LiAlH<sub>4</sub> according to the typical procedure (eq B) (53% yield). <sup>31</sup>P{<sup>1</sup>H} NMR (CDCl<sub>3</sub>, 162 MHz)  $\delta$  -97.1. <sup>1</sup>H NMR (CDCl<sub>3</sub>, 400 MHz)  $\delta$  2.26 (s, 3H), 2.46 (s, 6H), 5.56 (d,  $J_{\text{HP}} = 230.1$  Hz, 1H), 6.89 (d,  $J = 1.6$  Hz, 2H), 6.98 (td,  $J = 4.8$  Hz, 1.2 Hz, 1H), 7.20 (t,  $J = 4.0$  Hz, 1H), 7.40 (dd,  $J = 4.8$  Hz, 0.8 Hz, 1H). <sup>13</sup>C NMR (CDCl<sub>3</sub>, 100 MHz)  $\delta$  21.3 (s, 1C), 23.3 (d,  $J_{\text{CP}} = 11.3$  Hz, 2C), 127.9 (d,  $J_{\text{CP}} = 7.5$  Hz, 1C), 129.3 (d,  $J_{\text{CP}} = 3.3$  Hz, 2C), 129.5 (d,  $J_{\text{CP}} = 8.9$  Hz, 1C), 131.0 (s, 1C), 133.3 (d,  $J_{\text{CP}} = 30.3$  Hz, 1C), 135.3 (d,  $J_{\text{CP}} = 25.2$  Hz, 1C), 138.9 (s, 1C), 142.0 (d,  $J_{\text{CP}} = 12.4$  Hz, 2C). HRMS (ESI) calcd for C<sub>13</sub>H<sub>16</sub>PS [M+H]<sup>+</sup> 235.0711, found 235.0710.

#### 4. Palladium-catalyzed asymmetric addition of Ph(Mes)PH (1a) to 2,5-diphenyl-1,4-benzoquinone (2m) (Table 1)

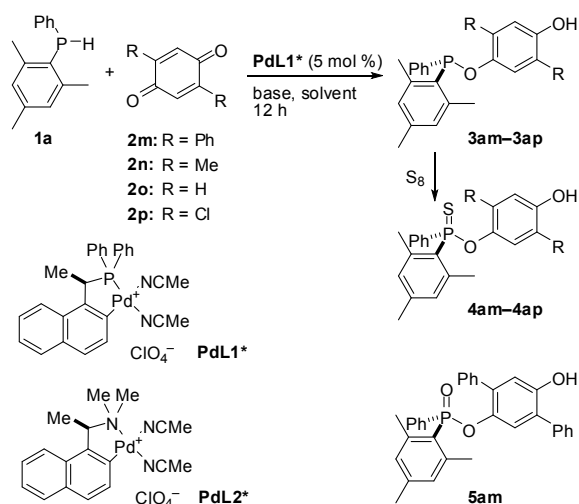

**A typical procedure (Table 1, entry 1):** To a solution of phenyl(2,4,6-trimethyl)-phosphine (**1a**) (68.5 mg, 0.300 mmol) in degassed  $CHCl_3$  (7 mL) was added **PdL1\*** (9.4 mg, 0.015 mmol, 5 mol%). The solution was stirred at room temperature for 2 min, before it was cooled to  $-45\text{ }^\circ\text{C}$ . 2,5-Diphenyl-1,4-benzoquinone (**2m**) (82.0 mg, 0.315 mmol) was added, followed by dropwise addition of  $Et_3N$  (30.3 mg, 0.300 mmol) in  $CHCl_3$  (0.5 mL). The mixture was stirred at  $-45\text{ }^\circ\text{C}$  for 12 h to give a  $CHCl_3$  solution containing phosphinite **3am** as a major component. The phosphinite **3am** was found to undergo decomposition/oxidation during the isolation by silica-gel chromatography, and it was isolated and characterized as thiophosphinate **4am** or phosphinate **5am**.

For the conversion into thiophosphinate **4am**, excess sulfur powder (14.4 mg, 0.450 mmol) was added to the reaction mixture. After stirring at room temperature for 15 min, the reaction mixture was passed through a short celite pad and the solution was concentrated on a rotary evaporator. The residue was subjected to silica-gel chromatography ( $EtOAc/hexane = 1/7$ ) to give **4am** (150 mg, 96%).

For the conversion into phosphinate **5am**, excess 30%  $H_2O_2$  (2 mL) was added to the reaction mixture in  $CHCl_3$ , and the mixture was stirred vigorously at room temperature for 15 min. The mixture was extracted with  $CH_2Cl_2$  (15 mL  $\times$  3). The organic extracts were washed with  $H_2O$ , and dried over  $MgSO_4$ . The solvent was removed by a rotary evaporator. The residue was subjected to silica-gel chromatography ( $acetone/CH_2Cl_2 = 1/10$ ) to give **5am**.

(142 mg, 94%).

## 5. Palladium-catalyzed asymmetric addition of diarylphosphines

### 1 to benzoquinone 2m (Table 2)

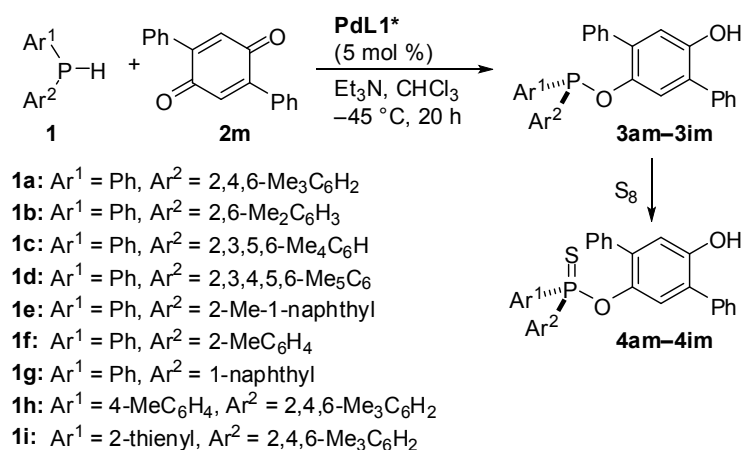

**A general procedure:** To a solution of diarylphosphine **1** (0.300 mmol) in degassed  $\text{CHCl}_3$  (7 mL) was added **PdL1\*** (9.4 mg, 0.015 mmol, 5 mol%). The solution was stirred at room temperature for 2 min, before it was cooled to  $-45^\circ\text{C}$ . 2,5-Diphenyl-1,4-benzoquinone (**2m**) (82.0mg, 0.315 mmol) was added, followed by dropwise addition of  $\text{Et}_3\text{N}$  (30.3 mg, 0.300 mmol) in  $\text{CHCl}_3$  (0.5 mL). The solution was subsequently stirred at  $-45^\circ\text{C}$  for 20 h to give a  $\text{CHCl}_3$  solution containing phosphinite **3** as a major component.

For the conversion into thiophosphinate **4**, excess sulfur powder (14.4 mg, 0.450 mmol) was added to the reaction mixture. After stirring at room temperature for 15 min, the reaction mixture was passed through a short celite pad and the solution was concentrated on a rotary evaporator. The residue was subjected to silica-gel chromatography ( $\text{EtOAc}/\text{hexane} = 1/7$ ) to give **4**.

## 6. Determination of the absolute configuration of phosphinite

### 3am

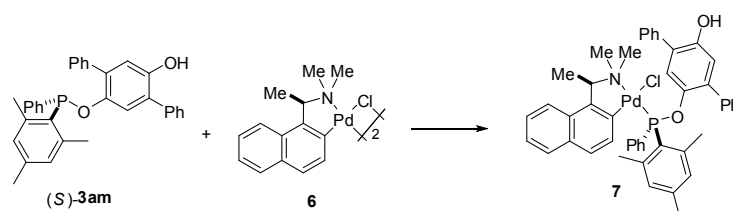



To the reaction mixture containing phosphinite **3am**, which was obtained by the reaction of diarylphosphine **1a** (0.300 mmol) with benzoquinone **2m** (Table 1, entry 1), was added palladium complex (*R*)-**6** (107.2 mg, 0.157 mmol, 0.315 mol of Pd) (CAS: 80145-77-3).<sup>6</sup> The mixture was stirred at room temperature for 30 min and was concentrated on a rotary evaporator. The residue was subjected to silica-gel chromatography (EtOAc/hexane = 1/4) to give the phosphinite complex **7** (236.2 mg, 95%).

Colorless crystals of complex **7** suitable for X-ray crystallographic analysis were obtained by recrystallization from dichloromethane/ether/hexane. The ORTEP drawing of complex **7** is shown in Figure S1 (page S23). The X-ray analysis revealed that absolute configuration of **3am** is *S*.

## 7. A typical procedure for the preparation of racemic **4** and **5**

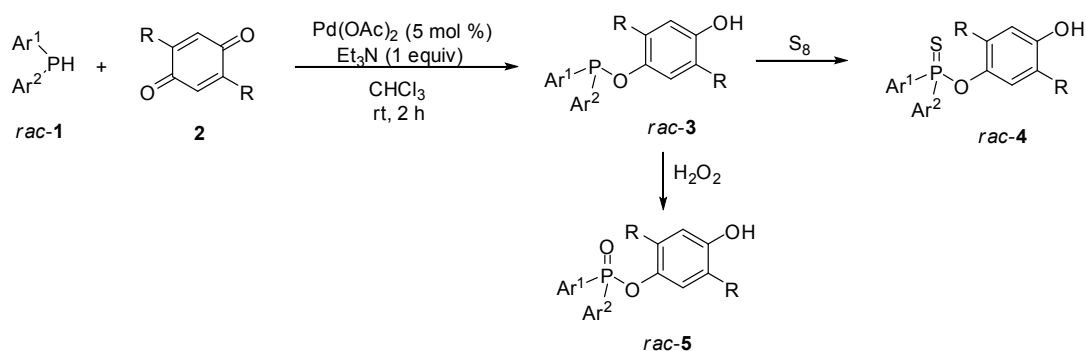

The *rac*-**4** and *rac*-**5** were prepared at room temperature employing Pd(OAc)<sub>2</sub> as a catalyst. A typical procedure for the synthesis of *rac*-**4a** and *rac*-**5a** is shown below.

To a solution of phenyl(2,4,6-trimethylphenyl)phosphine (**1a**) (68.5 mg, 0.300 mmol) in degassed CHCl<sub>3</sub> (7 mL) was added Pd(OAc)<sub>2</sub> (3.4 mg, 0.015 mmol, 5 mol%) and 2,5-diphenyl-1,4-benzoquinone (**2m**) (82.0 mg, 0.315 mmol) at room temperature. Subsequently, Et<sub>3</sub>N (30.3 mg, 0.300 mmol) in CHCl<sub>3</sub> (0.5 mL) was added dropwise. The solution was stirred at room temperature and the reaction was monitored by <sup>31</sup>P{<sup>1</sup>H} NMR. Upon completion (about 2 h), the reaction mixture was treated with excess sulfur powder (14.4 mg, 0.450 mmol) or excess 30% H<sub>2</sub>O<sub>2</sub> (2 mL) to give racemic thiophosphinate *rac*-**4am** (85%) or phosphinate *rac*-**5am** (84%), respectively, which were isolated and purified as described above for the asymmetric addition.

## 8. Characterization of the products 4 and 5

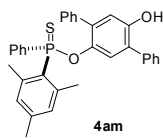

**Compound 4am.** The ee was measured by HPLC (Daicel Chiralpak AD-H), hexane/2-propanol = 97/3, flow 1.0 mL/min, 280 nm,  $t_1$  = 34.9 min (major),  $t_2$  = 38.7 min (minor).  $[\alpha]_D^{20}$  +202 ( $c$  1.28,  $\text{CH}_2\text{Cl}_2$ ) for 98% ee (*S*).  $^{31}\text{P}\{^1\text{H}\}$  NMR ( $\text{CDCl}_3$ , 202 MHz)  $\delta$  85.3.  $^1\text{H}$  NMR ( $\text{CDCl}_3$ , 500 MHz)  $\delta$  2.24 (s, 3H), 2.27 (s, 6H), 5.25 (s, 1H), 6.75 (s, 1H), 6.81 (d,  $J$  = 4.6 Hz, 2H), 7.06 (td,  $J$  = 7.7 Hz, 3.5 Hz, 2H), 7.12-7.20 (m, 5H), 7.27 (t,  $J$  = 7.5 Hz, 1H), 7.34 (t,  $J$  = 7.2 Hz, 1H), 7.42-7.48 (m, 6H), 7.64 (d,  $J$  = 1.1 Hz, 1H).  $^{13}\text{C}$  NMR ( $\text{CDCl}_3$ , 125 MHz)  $\delta$  21.1 (s, 1C), 23.9 (d,  $J_{\text{CP}}$  = 4.5 Hz, 2C), 118.3 (s, 1C), 124.9 (d,  $J_{\text{CP}}$  = 4.9 Hz, 1C), 127.0 (s, 1C), 127.2 (s, 1C), 128.06 (s, 1C), 128.08 (d,  $J_{\text{CP}}$  = 13.5 Hz, 2C), 128.08 (s, 2C), 128.8 (d,  $J_{\text{CP}}$  = 117.0 Hz, 1C), 129.2 (s, 2C), 129.35 (s, 2C), 129.44 (s, 2C), 131.0 (d,  $J_{\text{CP}}$  = 12.4 Hz, 2C), 131.3 (d,  $J_{\text{CP}}$  = 13.3 Hz, 2C), 131.4 (d,  $J_{\text{CP}}$  = 2.8 Hz, 1C), 135.2 (d,  $J_{\text{CP}}$  = 101.0 Hz, 1C), 135.3 (d,  $J_{\text{CP}}$  = 4.6 Hz, 1C), 136.5 (s, 1C), 137.8 (s, 1C), 140.4 (d,  $J_{\text{CP}}$  = 9.3 Hz, 1C), 141.3 (d,  $J_{\text{CP}}$  = 2.8 Hz, 1C), 141.6 (d,  $J_{\text{CP}}$  = 11.7 Hz, 2C), 149.1 (s, 1C). HRMS (ESI) calcd for  $\text{C}_{33}\text{H}_{30}\text{O}_2\text{PS}$   $[\text{M}+\text{H}]^+$  521.1704, found 521.1701.

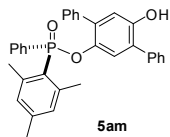

**Compound 5am.** The ee was measured by HPLC (Daicel Chiralpak IC), hexane/2-propanol = 90/10, flow 1.0 mL/min, 280 nm,  $t_1$  = 16.8 min (minor),  $t_2$  = 19.4 min (major).  $[\alpha]_D^{20}$  -52 ( $c$  1.16,  $\text{CH}_2\text{Cl}_2$ ) for 98% ee.  $^{31}\text{P}\{^1\text{H}\}$  NMR ( $\text{CDCl}_3$ , 162 MHz)  $\delta$  35.0.  $^1\text{H}$  NMR ( $\text{CDCl}_3$ , 400 MHz)  $\delta$  2.27 (s, 3H), 2.36 (s, 6H), 6.12 (s, 1H), 6.85 (d,  $J$  = 4.2 Hz, 2H), 6.87 (s, 1H), 7.06 (d,  $J$  = 1.3 Hz, 1H), 7.22-7.27 (m, 5H), 7.28-7.34 (m, 5H), 7.36-7.43 (m, 5H).  $^{13}\text{C}$  NMR ( $\text{CDCl}_3$ , 100 MHz)  $\delta$  21.3 (s, 1C), 23.5 (d,  $J_{\text{CP}}$  = 3.4 Hz, 2C), 118.7 (s, 1C), 121.9 (d,  $J_{\text{CP}}$  = 4.0 Hz, 1C), 124.0 (d,  $J_{\text{CP}}$  = 129.5 Hz, 1C), 127.4 (s, 1C), 127.7 (s, 1C), 127.9 (s, 1C), 128.1 (s, 2C), 128.5 (d,  $J_{\text{CP}}$  = 13.8 Hz, 2C), 129.0 (s, 2C), 129.2 (s, 2C), 129.8 (s, 2C), 130.6 (d,  $J_{\text{CP}}$  = 11.5 Hz, 2C), 131.1 (d,  $J_{\text{CP}}$  = 13.3 Hz, 2C), 131.8 (d,  $J_{\text{CP}}$  = 2.9 Hz, 1C), 134.2 (d,  $J_{\text{CP}}$  = 137.2 Hz, 1C), 134.6 (d,  $J_{\text{CP}}$  = 5.0 Hz, 1C), 136.8 (s, 1C), 137.7 (s, 1C), 141.1 (d,  $J_{\text{CP}}$  = 8.4 Hz, 1C), 142.6 (d,  $J_{\text{CP}}$  = 2.8 Hz, 1C), 144.1 (d,  $J_{\text{CP}}$  = 11.8 Hz, 2C), 149.6 (s, 1C). HRMS (ESI) calcd for  $\text{C}_{33}\text{H}_{30}\text{O}_3\text{P}$   $[\text{M}+\text{H}]^+$  505.1933, found 505.1938.

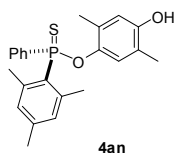

4an

**Compound 4an.** The ee was measured by HPLC (Daicel Chiralpak AD-H), hexane/2-propanol = 97/3, flow 1.0 mL/min, 280 nm,  $t_1$  = 22.1 min (major),  $t_2$  = 39.1 min (minor).  $[\alpha]_D^{20}$  +112 ( $c$  2.67, CH<sub>2</sub>Cl<sub>2</sub>) for 87% ee.  $^{31}\text{P}\{^1\text{H}\}$  NMR (CDCl<sub>3</sub>, 162 MHz)  $\delta$  84.4.  $^1\text{H}$  NMR (CDCl<sub>3</sub>, 400 MHz)  $\delta$  1.91 (s, 3H), 2.00 (s, 3H), 2.30 (s, 3H), 2.43 (s, 6H), 6.43 (s, 1H), 6.76 (s, 1H), 6.91 (d,  $J$  = 4.6 Hz, 2H), 7.39 (td,  $J$  = 7.6 Hz, 3.4 Hz, 2H), 7.48 (t,  $J$  = 7.6 Hz, 1H), 7.86 (dd,  $J$  = 14.0 Hz, 7.6 Hz, 2H).  $^{13}\text{C}$  NMR (CDCl<sub>3</sub>, 100 MHz)  $\delta$  15.6 (s, 1C), 17.3 (s, 1C), 21.2 (s, 1C), 24.3 (d,  $J_{\text{CP}}$  = 4.4 Hz, 2C), 117.5 (s, 1C), 121.5 (d,  $J_{\text{CP}}$  = 1.4 Hz, 1C), 124.3 (d,  $J_{\text{CP}}$  = 4.2 Hz, 1C), 128.5 (d,  $J_{\text{CP}}$  = 13.2 Hz, 2C), 128.6 (d,  $J_{\text{CP}}$  = 115.8 Hz, 1C), 128.9 (d,  $J_{\text{CP}}$  = 4.7 Hz, 1C), 131.3 (d,  $J_{\text{CP}}$  = 11.9 Hz, 2C), 131.5 (d,  $J_{\text{CP}}$  = 13.1 Hz, 2C), 132.0 (d,  $J_{\text{CP}}$  = 2.9 Hz, 1C), 136.4 (d,  $J_{\text{CP}}$  = 100.2 Hz, 1C), 141.5 (d,  $J_{\text{CP}}$  = 3.0 Hz, 1C), 141.9 (d,  $J_{\text{CP}}$  = 11.6 Hz, 2C), 142.0 (d,  $J_{\text{CP}}$  = 9.6 Hz, 1C), 150.4 (d,  $J_{\text{CP}}$  = 1.6 Hz, 1C). HRMS (ESI) calcd for C<sub>23</sub>H<sub>26</sub>O<sub>2</sub>PS  $[\text{M}+\text{H}]^+$  397.1391, found 397.1386.

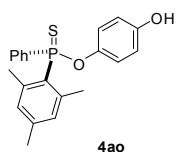

4ao

**Compound 4ao.** The ee was measured by HPLC (Daicel Chiralpak AD-H), hexane/2-propanol = 96/4, flow 0.8 mL/min, 280 nm,  $t_1$  = 34.5 min (major),  $t_2$  = 37.1 min (minor).  $[\alpha]_D^{20}$  +60 ( $c$  1.00, CH<sub>2</sub>Cl<sub>2</sub>) for 68% ee.  $^{31}\text{P}\{^1\text{H}\}$  NMR (CDCl<sub>3</sub>, 162 MHz)  $\delta$  85.1.  $^1\text{H}$  NMR (CDCl<sub>3</sub>, 400 MHz)  $\delta$  2.29 (s, 3H), 2.36 (s, 6H), 5.16 (s, 1H), 6.55 (d,  $J$  = 8.8 Hz, 2H), 6.67 (dd,  $J$  = 8.8 Hz, 1.7 Hz, 2H), 6.88 (d,  $J$  = 4.7 Hz, 2H), 7.43 (td,  $J$  = 7.6 Hz, 3.6 Hz, 2H), 7.52 (td,  $J$  = 7.6 Hz, 2.0 Hz, 1H), 7.91 (dd,  $J$  = 14.0 Hz, 7.6 Hz, 2H).  $^{13}\text{C}$  NMR (CDCl<sub>3</sub>, 100 MHz)  $\delta$  21.2 (s, 1C), 24.0 (d,  $J_{\text{CP}}$  = 4.9 Hz, 2C), 115.9 (s, 1C), 123.1 (d,  $J_{\text{CP}}$  = 4.4 Hz, 1C), 128.57 (d,  $J_{\text{CP}}$  = 13.5 Hz, 2C), 128.63 (d,  $J_{\text{CP}}$  = 118.4 Hz, 1C), 131.3 (d,  $J_{\text{CP}}$  = 13.0 Hz, 2C), 131.8 (d,  $J_{\text{CP}}$  = 11.7 Hz, 2C), 132.2 (d,  $J_{\text{CP}}$  = 2.8 Hz, 1C), 135.9 (d,  $J_{\text{CP}}$  = 99.9 Hz, 1C), 141.60 (d,  $J_{\text{CP}}$  = 3.8 Hz, 1C), 141.64 (d,  $J_{\text{CP}}$  = 11.5 Hz, 2C), 143.1 (d,  $J_{\text{CP}}$  = 9.2 Hz, 1C), 152.7 (d,  $J_{\text{CP}}$  = 1.6 Hz, 1C). HRMS (ESI) calcd for C<sub>21</sub>H<sub>22</sub>O<sub>2</sub>PS  $[\text{M}+\text{H}]^+$  396.1078, found 396.1080.

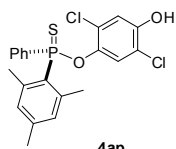

4ap

**Compound 4ap.** The ee was measured by HPLC (Daicel Chiralpak AD-H), hexane/2-propanol = 95/5, flow 0.8 mL/min, 280 nm,  $t_1$  = 11.8 min (major),  $t_2$  = 18.3 min

(minor).  $[\alpha]_D^{20} -27$  ( $c$  1.13,  $\text{CH}_2\text{Cl}_2$ ) for 7% ee.  $^{31}\text{P}\{^1\text{H}\}$  NMR ( $\text{CDCl}_3$ , 162 MHz)  $\delta$  87.9.  $^1\text{H}$  NMR ( $\text{CDCl}_3$ , 400 MHz)  $\delta$  2.30 (s, 3H), 2.39 (s, 6H), 6.90 (s, 1H), 6.90 (d,  $J = 3.1$  Hz, 2H), 7.39 (td,  $J = 7.7$  Hz, 3.5 Hz, 2H), 7.48 (td,  $J = 7.1$  Hz, 1.4 Hz, 1H), 7.61 (d,  $J = 1.3$  Hz, 1H), 7.92 (dd,  $J = 14.4$  Hz, 7.1 Hz, 2H).  $^{13}\text{C}$  NMR ( $\text{CDCl}_3$ , 100 MHz)  $\delta$  21.2 (s, 1C), 24.1 (d,  $J_{\text{CP}} = 4.8$  Hz, 2C), 117.4 (s, 1C), 117.8 (s, 1C), 122.7 (d,  $J_{\text{CP}} = 4.9$  Hz, 1C), 125.9 (d,  $J_{\text{CP}} = 5.7$  Hz, 1C), 128.47 (d,  $J_{\text{CP}} = 116.8$  Hz, 1C), 128.55 (d,  $J_{\text{CP}} = 13.5$  Hz, 2C), 131.5 (d,  $J_{\text{CP}} = 13.2$  Hz, 2C), 131.7 (d,  $J_{\text{CP}} = 12.3$  Hz, 2C), 132.5 (d,  $J_{\text{CP}} = 2.9$  Hz, 1C), 134.8 (d,  $J_{\text{CP}} = 99.2$  Hz, 1C), 140.3 (d,  $J_{\text{CP}} = 8.7$  Hz, 1C), 141.7 (d,  $J_{\text{CP}} = 11.9$  Hz, 2C), 141.8 (d,  $J_{\text{CP}} = 3.1$  Hz, 1C), 148.4 (d,  $J_{\text{CP}} = 1.2$  Hz, 1C). HRMS (ESI) calcd for  $\text{C}_{21}\text{H}_{20}\text{Cl}_2\text{O}_2\text{PS}$   $[\text{M}+\text{H}]^+$  437.0299, found 437.0292.

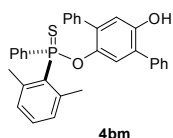

4bm

**Compound 4bm.** The ee was measured by HPLC (Daicel Chiralpak AD-H), hexane/2-propanol = 97/3, flow 1.0 mL/min, 280 nm,  $t_1 = 36.6$  min (minor),  $t_2 = 41.6$  min (major).  $[\alpha]_D^{20} +199$  ( $c$  1.71,  $\text{CH}_2\text{Cl}_2$ ) for 98% ee.  $^{31}\text{P}\{^1\text{H}\}$  NMR ( $\text{CDCl}_3$ , 202 MHz)  $\delta$  84.6.  $^1\text{H}$  NMR ( $\text{CDCl}_3$ , 500 MHz)  $\delta$  2.31 (s, 6H), 5.14 (s, 1H), 6.79 (s, 1H), 7.00 (dd,  $J = 7.4$  Hz, 5.1 Hz, 2H), 7.10 (td,  $J = 7.7$  Hz, 3.5 Hz, 2H), 7.16-7.24 (m, 6H), 7.30 (t,  $J = 6.9$  Hz, 1H), 7.38-7.50 (m, 7H), 7.66 (d,  $J = 1.3$  Hz, 1H).  $^{13}\text{C}$  NMR ( $\text{CDCl}_3$ , 125 MHz)  $\delta$  24.0 (s,  $J_{\text{CP}} = 4.7$  Hz, 2C), 118.4 (s, 1C), 124.9 (d,  $J_{\text{CP}} = 4.8$  Hz, 1C), 127.1 (s, 1C), 127.3 (s, 1C), 128.16 (s, 2C), 128.17 (d,  $J_{\text{CP}} = 13.3$  Hz, 2C), 128.23 (s, 1C), 129.2 (s, 2C), 129.50 (s, 2C), 129.54 (s, 2C), 130.4 (d,  $J_{\text{CP}} = 12.6$  Hz, 2C), 131.1 (d,  $J_{\text{CP}} = 2.5$  Hz, 1C), 131.2 (d,  $J_{\text{CP}} = 12.5$  Hz, 2C), 131.6 (d,  $J_{\text{CP}} = 3.0$  Hz, 1C), 132.1 (d,  $J_{\text{CP}} = 115.5$  Hz, 1C), 134.9 (d,  $J_{\text{CP}} = 98.1$  Hz, 1C), 135.3 (d,  $J_{\text{CP}} = 1.1$  Hz, 1C), 136.5 (s, 1C), 137.8 (s, 1C), 140.4 (d,  $J_{\text{CP}} = 9.2$  Hz, 1C), 141.6 (d,  $J_{\text{CP}} = 11.0$  Hz, 2C), 149.1 (s, 1C). HRMS (ESI) calcd for  $\text{C}_{32}\text{H}_{28}\text{O}_2\text{PS}$   $[\text{M}+\text{H}]^+$  507.1549, found 507.1548.

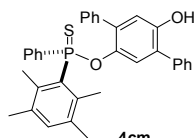

4cm

**Compound 4cm.** The ee was measured by HPLC (Daicel Chiralpak AD-H), hexane/2-propanol = 95/5, flow 0.8 mL/min, 280 nm,  $t_1 = 16.7$  min (minor),  $t_2 = 22.4$  min (major).  $[\alpha]_D^{20} +164$  ( $c$  1.58,  $\text{CH}_2\text{Cl}_2$ ) for 97% ee.  $^{31}\text{P}\{^1\text{H}\}$  NMR ( $\text{CDCl}_3$ , 162 MHz)  $\delta$  84.3.  $^1\text{H}$  NMR ( $\text{CDCl}_3$ , 400 MHz)  $\delta$  2.05 (s, 6H), 2.09 (s, 6H), 5.16 (s, 1H), 6.75 (d,  $J = 0.9$  Hz, 1H), 7.02 (s, 1H), 7.13 (td,  $J = 8.0$  Hz, 3.6 Hz, 2H), 7.16-7.23 (m, 5H), 7.28-7.36 (m, 2H),

7.39-7.45 (m, 4H), 7.49 (dd,  $J = 14.0$  Hz, 8.4 Hz, 2H), 7.73 (d,  $J = 1.2$  Hz, 1H).  $^{13}\text{C}$  NMR ( $\text{CDCl}_3$ , 100 MHz):  $\delta$  20.1 (d,  $J_{\text{CP}} = 6.4$  Hz, 2C), 20.2 (d,  $J_{\text{CP}} = 1.7$  Hz, 2C), 118.1 (s, 1C), 123.3 (d,  $J_{\text{CP}} = 5.4$  Hz, 1C), 127.0 (s, 1C), 127.2 (s, 1C), 127.9 (s, 2C), 128.0 (s, 1C), 128.1 (d,  $J_{\text{CP}} = 11.3$  Hz, 2C), 129.1 (s, 2C), 129.4 (s, 2C), 129.5 (s, 2C), 131.3 (d,  $J_{\text{CP}} = 11.9$  Hz, 2C), 131.4 (d,  $J_{\text{CP}} = 2.8$  Hz, 2C), 133.1 (d,  $J_{\text{CP}} = 119.0$  Hz, 1C), 134.5 (d,  $J_{\text{CP}} = 5.2$  Hz, 1C), 134.6 (d,  $J_{\text{CP}} = 2.8.0$  Hz, 1C), 135.22 (d,  $J_{\text{CP}} = 99.8$  Hz, 1C), 135.20 (d,  $J_{\text{CP}} = 13.7$  Hz, 2C), 137.5 (d,  $J_{\text{CP}} = 11.4$  Hz, 2C), 137.7 (s, 1C), 141.3 (d,  $J_{\text{CP}} = 9.3$  Hz, 1C), 148.7 (s, 1C). HRMS (ESI) calcd for  $\text{C}_{34}\text{H}_{32}\text{O}_2\text{PS}$   $[\text{M}+\text{H}]^+$  535.1861, found 535.1860.

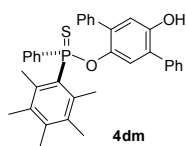

4dm

**Compound 4dm.** The ee was measured by HPLC (Daicel Chiralpak AD-H), hexane/2-propanol = 95/5, flow 0.8 mL/min, 280 nm,  $t_1 = 15.7$  min (minor),  $t_2 = 19.3$  min (major).  $[\alpha]_{\text{D}}^{20} +165$  ( $c$  2.55,  $\text{CH}_2\text{Cl}_2$ ) for 97% ee.  $^{31}\text{P}\{^1\text{H}\}$  NMR ( $\text{CDCl}_3$ , 162 MHz)  $\delta$  84.3.  $^1\text{H}$  NMR ( $\text{CDCl}_3$ , 400 MHz)  $\delta$  2.07 (s, 12H), 2.24 (s, 3H), 5.11 (s, 1H), 6.76 (s, 1H), 7.11-7.25 (m, 7H), 7.29-7.47 (m, 6H), 7.51 (dd,  $J = 14.0$  Hz, 7.6 Hz, 2H), 7.71 (d,  $J = 1.2$  Hz, 1H).  $^{13}\text{C}$  NMR ( $\text{CDCl}_3$ , 100 MHz):  $\delta$  16.3 (d,  $J_{\text{CP}} = 1.7$  Hz, 2C), 17.3 (s, 1C), 21.5 (d,  $J_{\text{CP}} = 6.8$  Hz, 2C), 118.1 (s, 1C), 123.1 (d,  $J_{\text{CP}} = 5.6$  Hz, 1C), 127.0 (s, 1C), 127.2 (s, 1C), 128.0 (s, 2C), 128.06 (d,  $J_{\text{CP}} = 11.5$  Hz, 2C), 128.07 (s, 1C), 129.1 (s, 2C), 129.4 (s, 2C), 129.6 (s, 2C), 131.0 (d,  $J_{\text{CP}} = 122.6$  Hz, 1C), 131.36 (d,  $J_{\text{CP}} = 11.8$  Hz, 2C), 131.40 (d,  $J_{\text{CP}} = 3.1$  Hz, 1C), 133.9 (d,  $J_{\text{CP}} = 13.2$  Hz, 2C), 134.4 (d,  $J_{\text{CP}} = 5.3$  Hz, 1C), 135.5 (d,  $J_{\text{CP}} = 99.0$  Hz, 1C), 136.6 (s, 1C), 136.9 (d,  $J_{\text{CP}} = 10.8$  Hz, 2C), 137.8 (s, 1C), 138.5 (d,  $J_{\text{CP}} = 3.4$  Hz, 1C), 141.5 (d,  $J_{\text{CP}} = 9.0$  Hz, 1C), 148.6 (s, 1C). HRMS (ESI) calcd for  $\text{C}_{35}\text{H}_{34}\text{O}_2\text{PS}$   $[\text{M}+\text{H}]^+$  549.2017, found 549.2014.

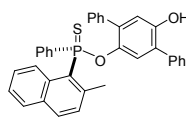

4em

**Compound 4em.** The ee was measured by HPLC (Daicel Chiralpak AD-H), hexane/2-propanol = 95/5, flow 0.8 mL/min, 280 nm,  $t_1 = 28.2$  min (minor),  $t_2 = 30.6$  min (major).  $[\alpha]_{\text{D}}^{20} +213$  ( $c$  1.25,  $\text{CH}_2\text{Cl}_2$ ) for 95% ee.  $^{31}\text{P}\{^1\text{H}\}$  NMR ( $\text{CDCl}_3$ , 162 MHz)  $\delta$  83.9.  $^1\text{H}$  NMR ( $\text{CDCl}_3$ , 400 MHz)  $\delta$  2.39 (d,  $J = 1.5$  Hz, 3H), 5.24 (s, 1H), 6.75 (s, 1H), 6.95 (t,  $J = 7.6$  Hz, 2H), 7.02-7.42 (m, 16H), 7.73 (d,  $J = 1.3$  Hz, 1H), 7.74 (dd,  $J = 17.4$  Hz, 8.2 Hz, 2H), 8.53 (d,  $J = 8.4$  Hz, 1H).  $^{13}\text{C}$  NMR ( $\text{CDCl}_3$ , 100 MHz)  $\delta$  24.4 (d,  $J_{\text{CP}} = 5.9$  Hz, 1C), 118.1 (s, 1C), 124.0 (d,  $J_{\text{CP}} = 5.0$  Hz, 1C), 125.3 (s, 1C), 126.2 (s, 1C), 127.1 (s, 2C), 127.2 (d,  $J_{\text{CP}} = 6.5$  Hz, 1C), 127.8 (s, 2C), 127.99 (d,  $J_{\text{CP}} = 115.6$  Hz, 1C), 128.04 (d,  $J_{\text{CP}} = 2.1$  Hz, 2C),

128.2 (d,  $J_{CP}$  = 13.8 Hz, 1C), , 128.5 (s, 1C), 129.0 (s, 2C), 129.3 (s, 2C), 129.5 (s, 2C), 130.3 (d,  $J_{CP}$  = 14.5 Hz, 1C), 131.2 (d,  $J_{CP}$  = 12.3 Hz, 2C), 131.7 (d,  $J_{CP}$  = 2.4 Hz, 1C), 132.4 (d,  $J_{CP}$  = 4.0 Hz, 1C), 132.5 (d,  $J_{CP}$  = 10.4 Hz, 1C), 132.9 (d,  $J_{CP}$  = 11.0 Hz, 1C), 134.8 (d,  $J_{CP}$  = 100.9 Hz, 1C), 135.0 (d,  $J_{CP}$  = 4.9 Hz, 1C), 136.4 (s, 1C), 137.2 (s, 1C), 141.0 (d,  $J_{CP}$  = 9.9 Hz, 1C), 141.5 (d,  $J_{CP}$  = 9.9 Hz, 1C), 149.1 (s, 1C). HRMS (ESI) calcd for  $C_{35}H_{28}O_2PS$   $[M+H]^+$  543.1548, found 543.1549.

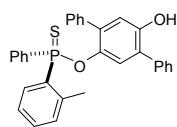

4fm

**Compound 4fm.** The ee was measured by HPLC (Daicel Chiralpak AD-H), hexane/2-propanol = 95/5, flow 0.8 mL/min, 280 nm,  $t_1$  = 19.5 min (minor),  $t_2$  = 23.9 min (major).  $[\alpha]_D^{20}$  +33 ( $c$  1.09,  $CH_2Cl_2$ ) for 43% ee.  $^{31}P\{^1H\}$  NMR ( $CDCl_3$ , 162 MHz)  $\delta$  80.7.  $^1H$  NMR ( $CDCl_3$ , 500 MHz)  $\delta$  2.15 (s, 3H), 5.19 (s, 1H), 6.90 (d,  $J$  = 0.5 Hz, 1H), 7.10 (d,  $J$  = 1.5 Hz, 1H), 7.11 (t,  $J$  = 6.5 Hz, 1H), 7.22-7.27 (m, 6H), 7.35-7.44 (m, 9H), 7.53 (dd,  $J$  = 14.5 Hz, 7.5 Hz, 2H), 8.03 (dd,  $J$  = 14.5 Hz, 7.5 Hz, 1H).  $^{13}C$  NMR ( $CDCl_3$ , 100 MHz)  $\delta$  21.6 (d,  $J_{CP}$  = 4.6 Hz, 1C), 118.3 (s, 1C), 123.5 (d,  $J_{CP}$  = 4.7 Hz, 1C), 125.8 (d,  $J_{CP}$  = 12.9 Hz, 1C), 127.3 (s, 1C), 127.5 (s, 1C), 128.16 (s, 2C), 128.17 (s, 1C), 128.4 (d,  $J_{CP}$  = 13.7 Hz, 2C), 129.1 (s, 2C), 129.5 (s, 2C), 129.9 (s, 2C), 131.2 (d,  $J_{CP}$  = 12.2 Hz, 2C), 131.8 (d,  $J_{CP}$  = 2.6 Hz, 1C), 132.1 (d,  $J_{CP}$  = 12.8 Hz, 1C), 132.26 (d,  $J_{CP}$  = 109.9 Hz, 1C), 132.33 (d,  $J_{CP}$  = 3.2 Hz, 1C), 132.9 (d,  $J_{CP}$  = 10.0 Hz, 1C), 134.7 (d,  $J_{CP}$  = 106.4 Hz, 1C), 135.8 (d,  $J_{CP}$  = 4.8 Hz, 1C), 136.4 (s, 1C), 137.6 (s, 1C), 141.1 (d,  $J_{CP}$  = 12.4 Hz, 1C), 141.4 (d,  $J_{CP}$  = 8.7 Hz, 1C), 149.2 (s, 1C). HRMS (ESI) calcd for  $C_{31}H_{26}O_2PS$   $[M+H]^+$  493.1391, found 493.1387.

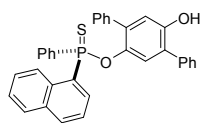

4gm

**Compound 4gm.** The ee was measured by HPLC (Daicel Chiralpak AD-H), hexane/2-propanol = 96/4, flow 0.8 mL/min, 280 nm,  $t_1$  = 24.1 min (major),  $t_2$  = 28.3 min (minor).  $[\alpha]_D^{20}$  -19 ( $c$  1.24,  $CH_2Cl_2$ ) for 24% ee.  $^{31}P\{^1H\}$  NMR ( $CDCl_3$ , 162 MHz)  $\delta$  81.1.  $^1H$  NMR ( $CDCl_3$ , 400 MHz)  $\delta$  5.21 (s, 1H), 6.90 (d,  $J$  = 0.6 Hz, 1H), 7.12 (d,  $J$  = 1.6 Hz, 1H), 7.16-7.29 (m, 6H), 7.30-7.42 (m, 9H), 7.45-7.49 (m, 1H), 7.56 (dd,  $J$  = 14.4 Hz, 8.4 Hz, 2H), 7.81 (d,  $J$  = 8.2 Hz, 1H), 7.97 (d,  $J$  = 8.2 Hz, 1H), 8.21 (d,  $J$  = 8.6 Hz, 1H), 8.32 (ddd,  $J$  = 17.2 Hz, 7.6 Hz, 1.2 Hz, 1H).  $^{13}C$  NMR ( $CDCl_3$ , 100 MHz)  $\delta$  118.3 (s, 1C), 123.5 (d,  $J_{CP}$  = 4.8 Hz, 1C), 124.6 (d,  $J_{CP}$  = 14.7 Hz, 1C), 126.3 (s, 1C), 126.7 (d,  $J_{CP}$  = 5.8 Hz, 1C), 127.1 (s, 1C), 127.4 (d,  $J_{CP}$  = 1.2 Hz, 1C), 127.5 (s, 1C), 128.0 (s, 2C), 128.1 (s, 1C), 128.5 (d,  $J_{CP}$  =

13.8 Hz, 2C), 129.1 (s, 2C), 129.3 (d,  $J_{\text{CP}} = 27.9$  Hz, 1C), 129.4 (s, 2C), 129.5 (d,  $J_{\text{CP}} = 107.8$  Hz, 1C), 129.9 (s, 2C), 131.0 (d,  $J_{\text{CP}} = 12.2$  Hz, 2C), 131.83 (d,  $J_{\text{CP}} = 11.0$  Hz, 1C), 131.86 (d,  $J_{\text{CP}} = 3.1$  Hz, 1C), 133.8 (d,  $J_{\text{CP}} = 3.1$  Hz, 1C), 131.9 (d,  $J_{\text{CP}} = 9.9$  Hz, 1C), 134.0 (d,  $J_{\text{CP}} = 10.9$  Hz, 1C), 135.2 (d,  $J_{\text{CP}} = 108.8$  Hz, 1C), 135.8 (d,  $J_{\text{CP}} = 4.9$  Hz, 1C), 136.4 (s, 1C), 137.5 (s, 1C), 141.5 (d,  $J_{\text{CP}} = 8.8$  Hz, 1C), 149.3 (s, 1C). HRMS (ESI) calcd for  $\text{C}_{34}\text{H}_{26}\text{O}_2\text{PS}$   $[\text{M}+\text{H}]^+$  529.1391, found 529.1388.

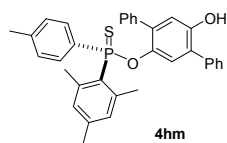

4hm

**Compound 4hm.** The ee was measured by HPLC (Daicel Chiralpak AD-H), hexane/2-propanol = 95/5, flow 0.8 mL/min, 280 nm,  $t_1 = 14.6$  min (minor),  $t_2 = 16.9$  min (major).  $[\alpha]_{\text{D}}^{20} +194$  ( $c$  2.01,  $\text{CH}_2\text{Cl}_2$ ) for 91% ee.  $^{31}\text{P}\{^1\text{H}\}$  NMR ( $\text{CDCl}_3$ , 162 MHz)  $\delta$  85.4.  $^1\text{H}$  NMR ( $\text{CDCl}_3$ , 400 MHz)  $\delta$  2.25 (s, 3H), 2.27 (s, 6H), 2.29 (s, 3H), 5.22 (s, 1H), 6.76 (d,  $J = 0.6$  Hz, 1H), 6.81 (d,  $J = 4.6$  Hz, 2H), 6.87 (dd,  $J = 7.9$  Hz, 3.2 Hz, 2H), 7.13-7.22 (m, 5H), 7.29-7.38 (m, 3H), 7.43-7.49 (m, 4H), 7.61 (d,  $J = 1.5$  Hz, 1H).  $^{13}\text{C}$  NMR ( $\text{CDCl}_3$ , 100 MHz)  $\delta$  21.1 (d,  $J_{\text{CP}} = 1.2$  Hz, 1C), 21.7 (d,  $J_{\text{CP}} = 1.0$  Hz, 1C), 23.9 (d,  $J_{\text{CP}} = 4.6$  Hz, 2C), 118.3 (s, 1C), 125.0 (d,  $J_{\text{CP}} = 4.9$  Hz, 1C), 127.0 (s, 1C), 127.1 (s, 1C), 127.9 (s, 2C), 128.1 (s, 1C), 128.8 (d,  $J_{\text{CP}} = 14.1$  Hz, 2C), 128.9 (d,  $J_{\text{CP}} = 114.8$  Hz, 1C), 129.2 (s, 2C), 129.4 (s, 2C), 129.5 (s, 2C), 131.1 (d,  $J_{\text{CP}} = 12.8$  Hz, 2C), 131.3 (d,  $J_{\text{CP}} = 13.1$  Hz, 2C), 132.1 (d,  $J_{\text{CP}} = 103.3$  Hz, 1C), 135.3 (d,  $J_{\text{CP}} = 4.7$  Hz, 1C), 136.6 (s, 1C), 137.9 (s, 1C), 140.4 (d,  $J_{\text{CP}} = 9.4$  Hz, 1C), 141.2 (d,  $J_{\text{CP}} = 3.0$  Hz, 1C), 141.6 (d,  $J_{\text{CP}} = 11.5$  Hz, 2C), 141.9 (d,  $J_{\text{CP}} = 2.8$  Hz, 1C), 149.0 (s, 1C). HRMS (ESI) calcd for  $\text{C}_{34}\text{H}_{32}\text{O}_2\text{PS}$   $[\text{M}+\text{H}]^+$  535.1861, found 535.1860.

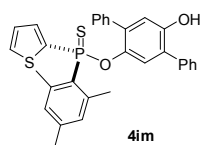

4im

**Compound 4im.** The ee was measured by HPLC (Daicel Chiralpak AD-H), hexane/2-propanol = 95/5, flow 0.8 mL/min, 280 nm,  $t_1 = 24.8$  min (major),  $t_2 = 27.8$  min (minor).  $[\alpha]_{\text{D}}^{20} +118$  ( $c$  2.03,  $\text{CH}_2\text{Cl}_2$ ) for 81% ee.  $^{31}\text{P}\{^1\text{H}\}$  NMR ( $\text{CDCl}_3$ , 162 MHz)  $\delta$  70.9.  $^1\text{H}$  NMR ( $\text{CDCl}_3$ , 400 MHz)  $\delta$  2.26 (s, 3H), 2.33 (s, 6H), 5.19 (s, 1H), 6.79-6.82 (m, 1H), 6.83 (d,  $J = 5.2$  Hz, 2H), 6.86 (s, 1H), 6.92 (dd,  $J = 8.4$  Hz, 3.6 Hz, 1H), 7.18-7.21 (m, 3H), 7.27 (dd,  $J = 6.0$  Hz, 2.4 Hz, 2H), 7.35-7.39 (m, 1H), 7.45-7.50 (m, 5H), 7.62 (d,  $J = 1.6$  Hz, 1H).  $^{13}\text{C}$  NMR ( $\text{CDCl}_3$ , 100 MHz)  $\delta$  21.1 (d,  $J_{\text{CP}} = 1.2$  Hz, 1C), 23.7 (d,  $J_{\text{CP}} = 4.6$  Hz, 2C), 118.3 (s, 1C), 124.7 (d,  $J_{\text{CP}} = 5.0$  Hz, 1C), 127.1 (s, 1C), 127.2 (s, 1C), 128.1 (s, 2C), 128.2 (s, 1C), 128.4 (d,  $J_{\text{CP}} = 15.6$  Hz, 1C), 129.3 (d,  $J_{\text{CP}} = 123.1$  Hz, 1C), 129.2 (s, 2C), 129.48 (s, 2C),

129.51 (s, 2C), 131.4 (d,  $J_{CP}$  = 13.7 Hz, 2C), 134.2 (d,  $J_{CP}$  = 6.3 Hz, 1C), 135.4 (d,  $J_{CP}$  = 4.9 Hz, 1C), 135.9 (d,  $J_{CP}$  = 12.1 Hz, 1C), 136.5 (s, 1C), 137.8 (s, 1C), 139.3 (d,  $J_{CP}$  = 112.7 Hz, 1C), 140.4 (d,  $J_{CP}$  = 9.9 Hz, 1C), 141.5 (d,  $J_{CP}$  = 3.0 Hz, 1C), 141.8 (d,  $J_{CP}$  = 12.1 Hz, 2C), 149.2 (d,  $J_{CP}$  = 1.4 Hz, 1C). HRMS (ESI) calcd for  $C_{31}H_{28}O_2PS_2$   $[M+H]^+$  527.1268, found 527.1265.

## 9. Addition of $Ph_2PH$ to 2,5-diphenyl-1,4-benzoquinone (**2m**)

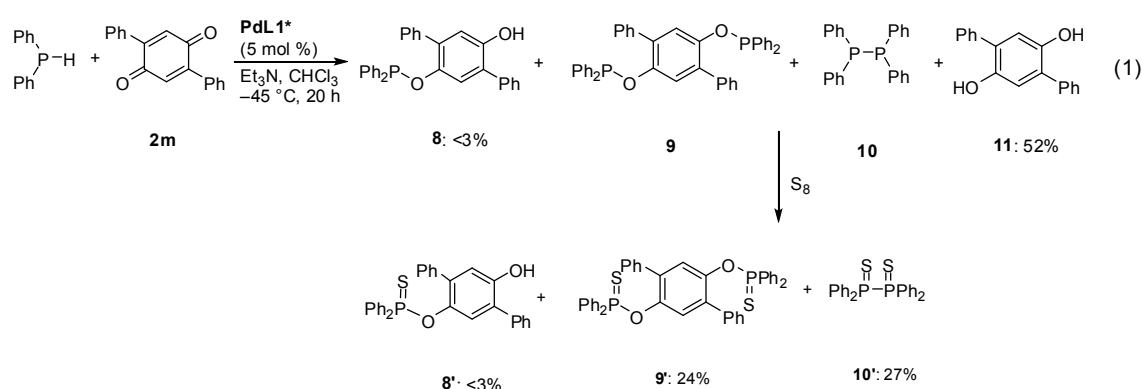

To a solution of  $Ph_2PH$  (55.9 mg, 0.300 mmol) in degassed  $CHCl_3$  (8 mL) was added  $PdL1^*$  (9.4 mg, 0.015 mmol, 5 mol%). The solution was stirred at room temperature for 2 minutes, before it was cooled to  $-45^\circ C$ . 2,5-Diphenyl-1,4-benzoquinone (**2m**) (82.0 mg, 0.315 mmol) was added followed by dropwise addition of  $Et_3N$  (30.3 mg, 0.300 mmol) in  $CHCl_3$  (0.5 mL). The mixture was stirred at  $-45^\circ C$  for 20 h. The mixture was filtered immediately and the solids (20 mg of **11**, poor solubility) was collected. The filtrate was treated with excess sulfur powder (14.4 mg, 0.450 mmol) and kept stirring at room temperature for 15 min. The mixture was passed through a short celite pad and the solution was concentrated on a rotary evaporator. The residue was subjected to silica-gel chromatography ( $EtOAc$ /hexane = 1/10 to 1/5) to give dithiophosphate **9'** (25.0 mg, 24% yield), diphosphine disulfide **10'** (17.6 mg, 27% yield), **11** (41.0 mg, 51% yield, combined with the collected solids), and trace amount of **8'** (<3%, based on  $^{31}P$  NMR).

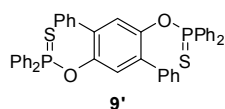

**Compound 9'**.  $^{31}P\{^1H\}$  NMR ( $CDCl_3$ , 162 MHz)  $\delta$  83.2.  $^1H$  NMR ( $CDCl_3$ , 400 MHz)  $\delta$  7.24-7.33 (m, 18H), 7.38 (br s, 2H), 7.42 (t,  $J$  = 7.4 Hz, 4H), 7.63 (dd,  $J$  = 13.8



Hz, 7.8 Hz, 8H).  $^{13}\text{C}$  NMR ( $\text{CDCl}_3$ , 100 MHz)  $\delta$  124.2 (d,  $J_{\text{CP}} = 4.6$  Hz, 2C), 127.6 (s, 2C), 128.2 (s, 4C), 128.4 (d,  $J_{\text{CP}} = 13.8$  Hz, 8C), 129.9 (s, 4C), 131.5 (d,  $J_{\text{CP}} = 11.7$  Hz, 8C), 132.0 (s,  $J_{\text{CP}} = 2.7$  Hz, 4C), 134.2 (d,  $J_{\text{CP}} = 110.2$  Hz, 4C), 134.3 (d,  $J_{\text{CP}} = 5.6$  Hz, 2C), 137.0 (s, 2C), 144.6 (d,  $J_{\text{CP}} = 9.2$  Hz, 2C). HRMS (ESI) calcd for  $\text{C}_{42}\text{H}_{33}\text{O}_2\text{P}_2\text{S}_2$   $[\text{M}+\text{H}]^+$  695.1397, found 695.1403.

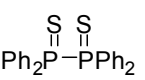 **Compound 10'** [1054-60-0].  $^{31}\text{P}\{^1\text{H}\}$  NMR ( $\text{CDCl}_3$ , 162 MHz)  $\delta$  38.6.  $^1\text{H}$  NMR ( $\text{CDCl}_3$ , 400 MHz)  $\delta$  7.38 (tdd,  $J = 7.6$  Hz, 2.4 Hz, 1.2 Hz, 8H), 7.50 (td,  $J = 7.2$  Hz, 1.2 Hz, 4H), 8.01-8.07 (m, 8H).

Colorless crystals of compound **10'** for X-ray crystallographic analysis were obtained by recrystallization from EtOAc/pentane. The ORTEP drawing of compound **10'** is shown in Figure S2 (page S25). The X-ray analysis of **10'** further confirmed the structure.

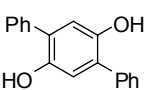 **Compound 11** [5422-91-3].  $^1\text{H}$  NMR ( $\text{CDCl}_3$ , 500 MHz)  $\delta$  4.90 (s, 2H), 6.91 (s, 2H), 7.39-7.43 (m, 2H), 7.48-7.52 (m, 8H).

## 10. Studies on kinetic resolution

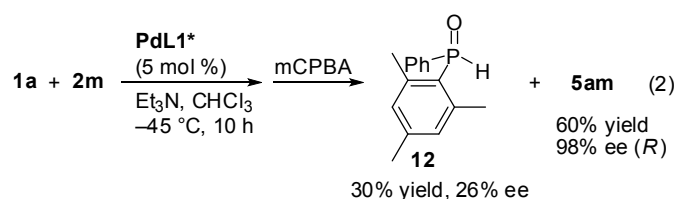

To a solution of phenyl(2,4,6-trimethylphenyl)phosphine (**1a**) (68.5 mg, 0.300 mmol) in degassed  $\text{CHCl}_3$  (7 mL) was added **PdL1\*** (9.4 mg, 0.015 mmol, 5 mol%). The solution was stirred at room temperature for 2 min, before it was cooled to  $-45^\circ\text{C}$ . 2,5-Diphenyl-1,4-benzoquinone (**2m**) (82.0 mg, 0.315 mmol) was added followed by dropwise addition of  $\text{Et}_3\text{N}$  (30.3 mg, 0.300 mmol) in  $\text{CHCl}_3$  (0.5 mL). The solution was stirred at  $-45^\circ\text{C}$  for 10 h (conversion = 63% based on  $^{31}\text{P}$  NMR). *m*-CPBA (0.300 mmol, 1 equiv, purified by recrystallization and titrated by the reaction with  $\text{Ph}_2\text{PH}$ ) was added, and the mixture was

kept stirring at  $-45\text{ }^{\circ}\text{C}$  for 8 h. The reaction mixture was concentrated on a rotary evaporator and the residue was subjected to silica-gel chromatography (acetone/ $\text{CH}_2\text{Cl}_2 = 1/10$  to  $1/5$ ) to give phosphinate **5am** (90.8 mg, 60% yield, 98% ee) and phosphine oxide **12** (22.0 mg, 30% recovered, 26% ee).

When the reaction was stopped at 97% conversion, phosphinate **5am** (139.3 mg, 92% yield, 98% ee) and phosphine oxide **12** (2.2 mg, 3% recovered, 84% ee) were isolated.

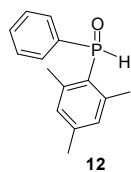

**Compound 12.** The ee was measured by HPLC (Daicel Chiralpak AD-H), hexane/2-propanol = 98/2, flow 1.0 mL/min, 280 nm,  $t_1 = 145.9$  min (major),  $t_2 = 158.9$  min (minor).  $[\alpha]_{\text{D}}^{20} +21$  ( $c$  0.92,  $\text{CH}_2\text{Cl}_2$ ) for 26% ee.  $^{31}\text{P}\{^1\text{H}\}$  NMR ( $\text{CDCl}_3$ , 202 MHz)  $\delta$  9.8.  $^1\text{H}$  NMR ( $\text{CDCl}_3$ , 500 MHz)  $\delta$  2.30 (s, 3H), 2.46 (s, 6H), 6.91 (d,  $J = 3.8$  Hz, 2H), 7.45 (td,  $J = 7.5$  Hz, 2.5 Hz, 2H), 7.52 (td,  $J = 7.0$  Hz, 1.5 Hz, 1H), 7.63 (dd,  $J = 13.5$  Hz, 7.0 Hz, 2H), 8.55 (d,  $J = 482.7$  Hz, 1H).  $^{13}\text{C}$  NMR ( $\text{CDCl}_3$ , 125 MHz)  $\delta$  21.4 (s, 1C), 21.6 (d,  $J_{\text{CP}} = 8.6$  Hz, 2C), 124.5 (d,  $J_{\text{CP}} = 102.4$  Hz, 1C), 128.9 (d,  $J_{\text{CP}} = 12.6$  Hz, 2C), 130.4 (d,  $J_{\text{CP}} = 10.2$  Hz, 2C), 130.6 (d,  $J_{\text{CP}} = 11.3$  Hz, 2C), 132.0 (d,  $J_{\text{CP}} = 3.2$  Hz, 1C), 132.4 (d,  $J_{\text{CP}} = 99.0$  Hz, 1C), 142.2 (d,  $J_{\text{CP}} = 9.9$  Hz, 2C), 142.9 (d,  $J_{\text{CP}} = 1.9$  Hz, 1C). HRMS (ESI) calcd for  $\text{C}_{15}\text{H}_{18}\text{OP}$   $[\text{M}+\text{H}]^+$  245.1095, found 245.1092.

## 11. Transformations of the products, (*S*)-**3am**, (*R*)-**4am**, and (*S*)-**5am**

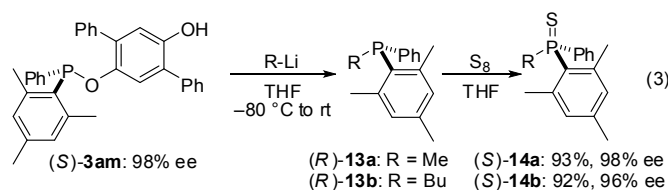

To a THF (5 mL) solution of (*S*)-**3am**, which was obtained by removal of  $\text{CHCl}_3$  from the reaction mixture in entry 1 of Table 2, was added MeLi (0.94 mL, 1.6 M in diethyl ether, 1.5 mmol, 5 equiv) at  $-80\text{ }^{\circ}\text{C}$ . The reaction mixture was kept stirring at  $-80\text{ }^{\circ}\text{C}$  for 8 h and warmed gradually to room temperature over 8 h. After stirring at room temperature for

another 2 h, degassed H<sub>2</sub>O (0.5 mL) was added followed by addition of excess S<sub>8</sub>. The reaction mixture was stirred for 15 min and passed through a short celite pad. The solution was extracted with EtOAc (20 mL × 3) and the organic layer was dried over MgSO<sub>4</sub>. The solvent was removed on a rotary evaporator and the residue was subjected to silica-gel chromatography (EtOAc/Hexane = 1/10) to give sulfide (*S*)-**14a** (76.5 mg, 93% yield, 98% ee).

Similarly, (*S*)-**14b** was prepared by reaction of (*S*)-**3am** with *n*-BuLi (0.6 mL, 2.5 M in hexane, 1.5 mmol) under otherwise the same conditions (87.3 mg, 92% yield, 96% ee).

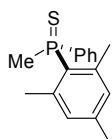

(*S*)-**14a** **Compound (*S*)-14a.** The ee was measured by HPLC (Daicel Chiralpak AD-H), hexane/2-propanol = 98/2, flow 1.0 mL/min, 280 nm,  $t_1$  = 11.3 min (minor),  $t_2$  = 19.8 min (major).  $[\alpha]_D^{20}$  –108 (*c* 1.94, CH<sub>2</sub>Cl<sub>2</sub>) for 98% ee.  $^{31}\text{P}\{^1\text{H}\}$  NMR (CDCl<sub>3</sub>, 121 MHz)  $\delta$  36.4.  $^1\text{H}$  NMR (CDCl<sub>3</sub>, 300 MHz)  $\delta$  2.24 (d,  $J$  = 13.2 Hz, 3H), 2.27 (s, 3H), 2.30 (s, 6H), 6.84 (d,  $J$  = 3.9 Hz, 2H), 7.40-7.48 (m, 3H), 7.81 (dd,  $J$  = 13.5 Hz, 8.1 Hz, 2H).  $^{13}\text{C}$  NMR (CDCl<sub>3</sub>, 75 MHz)  $\delta$  21.1 (s, 1C), 23.9 (d,  $J_{\text{CP}}$  = 5.9 Hz, 2C), 30.2 (d,  $J_{\text{CP}}$  = 57.0 Hz, 1C), 128.8 (d,  $J_{\text{CP}}$  = 12.2 Hz, 2C), 128.9 (d,  $J_{\text{CP}}$  = 83.4 Hz, 1C), 130.0 (d,  $J_{\text{CP}}$  = 10.8 Hz, 2C), 131.0 (d,  $J_{\text{CP}}$  = 2.9 Hz, 1C), 131.4 (d,  $J_{\text{CP}}$  = 11.0 Hz, 2C), 137.7 (d,  $J_{\text{CP}}$  = 80.4 Hz, 1C), 142.1 (d,  $J_{\text{CP}}$  = 2.9 Hz, 1C), 141.5 (d,  $J_{\text{CP}}$  = 10.3 Hz, 2C). HRMS (ESI) calcd for C<sub>16</sub>H<sub>20</sub>PS  $[\text{M}+\text{H}]^+$  275.1023, found 275.1021.

Colorless crystals of phosphine sulfide **14a** suitable for X-ray crystallographic analysis were obtained by recrystallization from EtOAc/pentane. The ORTEP drawing of **14a** is shown in Figure S3 (page S27). The X-ray analysis of the crystal revealed that absolute configuration of **14a** is *S*.

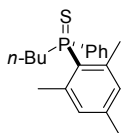

(*S*)-**14b** **Compound (*S*)-14b.** The ee was measured by HPLC (Daicel Chiralpak AD-H), hexane/2-propanol = 95/5, flow 0.8 mL/min, 280 nm,  $t_1$  = 8.7 min (major),  $t_2$  = 10.2 min (minor).  $[\alpha]_D^{20}$  –77 (*c* 4.04, CH<sub>2</sub>Cl<sub>2</sub>) for 96% ee.  $^{31}\text{P}\{^1\text{H}\}$  NMR (CDCl<sub>3</sub>, 162 MHz)  $\delta$  43.7.  $^1\text{H}$  NMR (CDCl<sub>3</sub>, 400 MHz)  $\delta$  0.69-0.82 (m, 1H), 0.79 (t,  $J$  = 7.3 Hz, 3H), 1.22-1.38 (m, 2H),

1.60-1.73 (m, 1H), 2.26 (s, 3H), 2.30 (s, 6H), 2.39-2.60 (m, 2H), 6.83 (d,  $J = 3.8$  Hz, 2H), 7.40-7.50 (m, 3H), 7.76 (dd,  $J = 12.8$  Hz, 6.8 Hz, 2H).  $^{13}\text{C}$  NMR ( $\text{CDCl}_3$ , 100 MHz)  $\delta$  13.8 (s, 1C), 21.0 (s, 1C), 24.1 (d,  $J_{\text{CP}} = 17.6$  Hz, 1C), 24.2 (d,  $J_{\text{CP}} = 4.8$  Hz, 2C), 25.1 (d,  $J_{\text{CP}} = 3.2$  Hz, 1C), 38.7 (d,  $J_{\text{CP}} = 52.8$  Hz, 1C), 128.5 (d,  $J_{\text{CP}} = 12.1$  Hz, 2C), 129.2 (d,  $J_{\text{CP}} = 81.4$  Hz, 1C), 130.87 (d,  $J_{\text{CP}} = 9.7$  Hz, 2C), 131.89 (d,  $J_{\text{CP}} = 3.9$  Hz, 1C), 131.5 (d,  $J_{\text{CP}} = 11.0$  Hz, 2C), 135.0 (d,  $J_{\text{CP}} = 76.9$  Hz, 1C), 140.9 (d,  $J_{\text{CP}} = 3.0$  Hz, 1C), 141.7 (d,  $J_{\text{CP}} = 10.0$  Hz, 2C). HRMS (ESI) calcd for  $\text{C}_{19}\text{H}_{26}\text{PS}$   $[\text{M}+\text{H}]^+$  317.1493, found 317.1492.

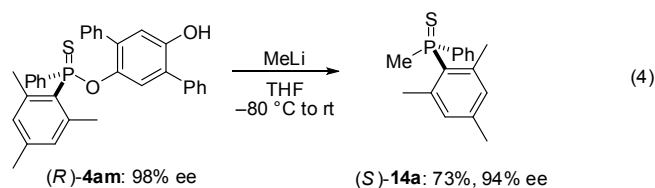

To a solution of (*R*)-**4am** (100.0 mg, 0.192 mmol) in dry THF (5 mL) was added MeLi (0.60 mL, 1.6 M in diethyl ether, 0.96 mmol, 5 equiv) at  $-80$  °C. The reaction mixture was kept stirring at  $-80$  °C for 8 h and warmed gradually to room temperature over 8 h. After stirring at room temperature for another 2 h, the reaction mixture was quenched by  $\text{H}_2\text{O}$  (0.5 mL) and extracted with EtOAc ( $20\text{ mL} \times 3$ ). The organic layer was dried over  $\text{MgSO}_4$  and the solvent was removed on a rotary evaporator. The residue was subjected to silica-gel chromatography (EtOAc/hexane = 1/10) to give the phosphine sulfide (*S*)-**14a** (38.5 mg, 73% yield, 94% ee).

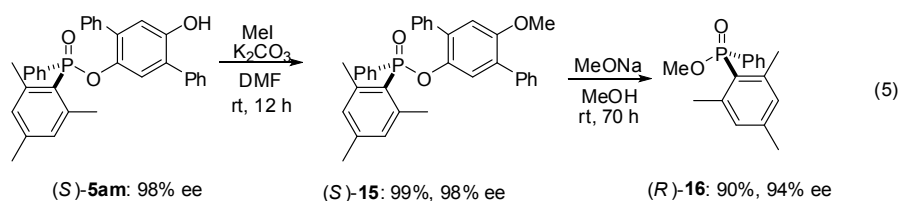

To a solution of (*S*)-**5am** (200 mg, 0.396 mmol, 98% ee) in dry DMF (5 mL) was added MeI (169 mg, 1.19 mmol) and  $\text{K}_2\text{CO}_3$  (164 mg, 1.19 mol). The reaction mixture was stirred at room temperature for 12 h. Saturated aqueous  $\text{NH}_4\text{Cl}$  was added, and the mixture was extracted with EtOAc ( $20\text{ mL} \times 3$ ). The organic layer was dried over  $\text{MgSO}_4$  and the solvent was removed by a rotary evaporator and vacuum pump. The residue was subjected to silica-gel chromatography (with acetone/ $\text{CH}_2\text{Cl}_2$  = 1/10) to give the product (*S*)-**15** (203.3 mg, 99% yield, 98% ee).

To a solution of (*S*)-**15** (98.5 mg, 0.190 mmol) in MeOH (5 mL) was added NaOMe (30.8

mg, 0.570 mmol) at 20 °C. The reaction mixture was kept stirring for 70 h (conversion = 92% based on  $^{31}\text{P}$  NMR). The solvent was removed on a rotary evaporator and the residue was dissolved in  $\text{CH}_2\text{Cl}_2$  (20 mL). It was washed with  $\text{H}_2\text{O}$  and dried over  $\text{MgSO}_4$ . The solvent was removed on a rotary evaporator and the residue was subjected to silica-gel chromatography ( $\text{EtOAc}/\text{hexane} = 1/5$ ) to give the product (*R*)-16 (46.9 mg, 90% yield, 94% ee).

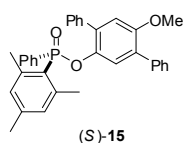

**Compound (S)-15.** The ee was measured by HPLC (Daicel Chiralpak IC, hexane/2-propanol = 90/10, flow 1.0 mL/min, 280 nm,  $t_1 = 27.9$  min (minor),  $t_2 = 30.3$  min (major).  $[\alpha]_{\text{D}}^{20} -28$  ( $c$  2.12,  $\text{CH}_2\text{Cl}_2$ ) for 98% ee (*S*).  $^{31}\text{P}\{^1\text{H}\}$  NMR ( $\text{CDCl}_3$ , 162 MHz)  $\delta$  34.8.  $^1\text{H}$  NMR ( $\text{CDCl}_3$ , 400 MHz)  $\delta$  2.27 (s, 3H), 2.36 (s, 6H), 3.74 (s, 3H), 6.86 (d,  $J = 4.1$  Hz, 2H), 6.90 (s, 1H), 7.21 (d,  $J = 1.2$  Hz, 1H), 7.21-7.28 (m, 3H), 7.30-7.42 (m, 10H), 7.51 (dd,  $J = 7.8$  Hz, 1.9 Hz, 2H).  $^{13}\text{C}$  NMR ( $\text{CDCl}_3$ , 100 MHz)  $\delta$  21.2 (s, 1C), 23.4 (d,  $J_{\text{CP}} = 3.4$  Hz, 2C), 56.2 (s, 1C), 114.3 (s, 1C), 122.8 (d,  $J_{\text{CP}} = 3.4$  Hz, 1C), 124.0 (d,  $J_{\text{CP}} = 128.6$  Hz, 1C), 127.3 (s, 1C), 127.5 (s, 1C), 128.1 (s, 2C), 128.2 (s, 2C), 128.4 (d,  $J_{\text{CP}} = 13.8$  Hz, 2C), 129.6 (s, 2C), 129.8 (s, 2C), 130.4 (d,  $J_{\text{CP}} = 11.5$  Hz, 2C), 130.5 (s, 1C), 131.0 (d,  $J_{\text{CP}} = 13.4$  Hz, 2C), 131.7 (d,  $J_{\text{CP}} = 2.9$  Hz, 1C), 134.0 (d,  $J_{\text{CP}} = 5.5$  Hz, 1C), 134.4 (d,  $J_{\text{CP}} = 137.2$  Hz, 1C), 137.5 (s, 1C), 138.2 (s, 1C), 141.5 (d,  $J_{\text{CP}} = 8.1$  Hz, 1C), 142.6 (d,  $J_{\text{CP}} = 2.8$  Hz, 1C), 144.1 (d,  $J_{\text{CP}} = 11.6$  Hz, 2C), 153.0 (s, 1C). HRMS (ESI) calcd for  $\text{C}_{34}\text{H}_{32}\text{O}_3\text{P}$   $[\text{M}+\text{H}]^+$  519.2089, found 519.2087.

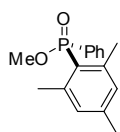

**Compound (R)-16.** The ee was measured by HPLC (Daicel Chiralpak IC), hexane/2-propanol = 90/10, flow 1.0 mL/min, 280 nm,  $t_1 = 54.8$  min (minor),  $t_2 = 68.8$  min (major).  $[\alpha]_{\text{D}}^{20} -28$  ( $c$  2.12,  $\text{CH}_2\text{Cl}_2$ ) for 94% ee.  $^{31}\text{P}\{^1\text{H}\}$  NMR ( $\text{CDCl}_3$ , 162 MHz)  $\delta$  37.2.  $^1\text{H}$  NMR ( $\text{CDCl}_3$ , 400 MHz)  $\delta$  2.29 (s, 3H), 2.49 (s, 6H), 3.73 (d,  $J = 11.2$  Hz, 3H), 6.91 (d,  $J = 4.0$  Hz, 2H), 7.38-7.42 (m, 2H), 7.45-7.50 (m, 1H), 7.66 (ddd,  $J = 12.8$  Hz, 8.0 Hz, 1.2 Hz, 2H).  $^{13}\text{C}$  NMR ( $\text{CDCl}_3$ , 100 MHz)  $\delta$  21.3 (s, 1C), 23.5 (d,  $J_{\text{CP}} = 3.2$  Hz, 2C), 50.8 (d,  $J_{\text{CP}} = 5.8$  Hz, 1C), 123.6 (d,  $J_{\text{CP}} = 130.1$  Hz, 1C), 128.6 (d,  $J_{\text{CP}} = 13.2$  Hz, 2C), 130.7 (d,  $J_{\text{CP}} = 10.9$  Hz, 2C), 131.0 (d,  $J_{\text{CP}} = 13.0$  Hz, 2C), 131.8 (d,  $J_{\text{CP}} = 2.8$  Hz, 1C), 134.2 (d,  $J_{\text{CP}} = 134.4$  Hz, 1C), 142.3 (d,  $J_{\text{CP}} = 2.8$  Hz, 1C), 144.1 (d,  $J_{\text{CP}} = 11.1$  Hz, 2C). HRMS (ESI) calcd for

C<sub>16</sub>H<sub>20</sub>O<sub>2</sub>P [M+H]<sup>+</sup> 275.1200, found 275.1201.

## 12. References

- (1) (a) Ng, J. K.; Tan, G. K.; Gagadese, J. V.; Leung, P. H. *Inorg. Chem.* **2003**, *42*, 7674. (b) Huang, Y.; Chew, R. J.; Li, Y.; Pullarkat, S. A.; Leung, P. H. *Org. Lett.* **2011**, *13*, 5862.
- (2) Chooi, S. Y. M.; Leung, P.-H.; Chin, L. C.; Mok, K. F.; Quek, G. H.; Sim, K. Y.; Tan, M. K. *Tetrahedron: Asymmetry* **1992**, *3*, 529.
- (3) Kovacic, I.; Wicht, D. K.; Grewal, N. S.; Glueck, D. S.; Incarvito, C. D.; Guzei, I. A.; Rheingold, A. L. *Organometallics* **2000**, *19*, 950.
- (4) Clarke, E. F.; Rafter, E.; Müller-Bunz, H.; Higham, L. J.; Gilheany, D. G. *J. Organomet. Chem.* **2011**, *696*, 3608.
- (5) (a) Peer, M.; Jong, J. C.; Kiefer, M.; Langer, T.; Rieck, H.; Schell, H.; Sennhenn, P.; Sprinz, J.; Steinhagen, H.; Wiese, B.; Helmchen, G. *Tetrahedron* **1996**, *52*, 7547.
- (6) Allen, D. G.; McLaughlin, G. M.; Robertson, G. B.; Steffen, W. L.; Salem, G.; Wild, S. B. *Inorg. Chem.* **1982**, *21*, 1007.

### 13. Single Crystal X-Ray Diffraction Data

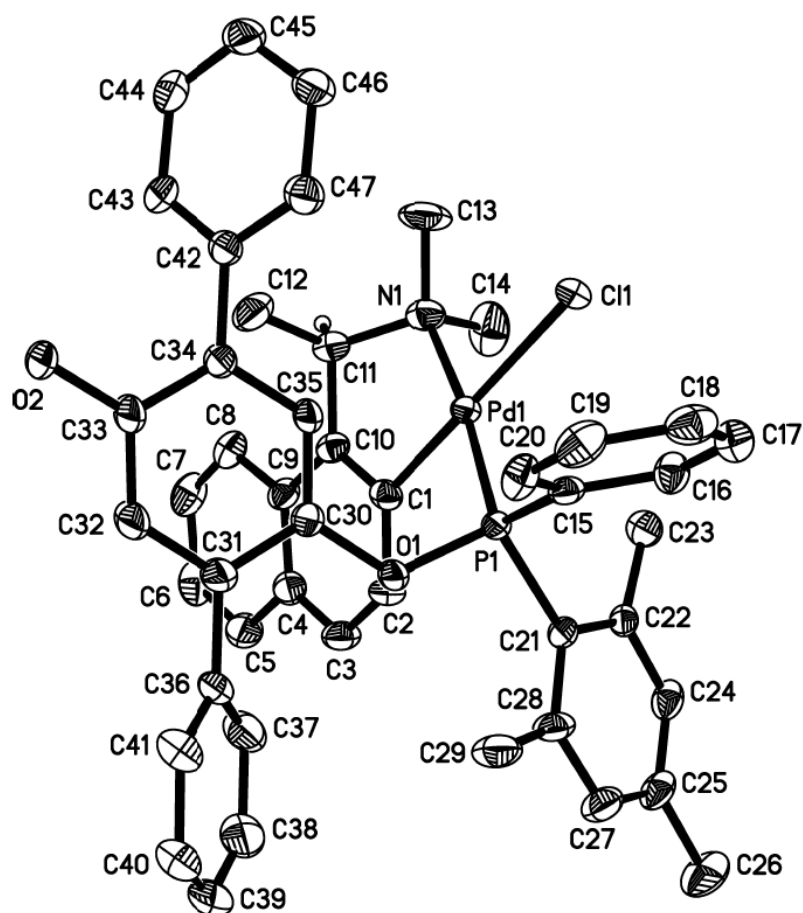

Figure S1. ORTEP illustration of complex **7** with thermal ellipsoids drawn at 50% probability level.

**Table S1. Crystal data and structure refinement for compex 7**

|                                   |                                                                                                                     |
|-----------------------------------|---------------------------------------------------------------------------------------------------------------------|
| Empirical formula                 | C <sub>48</sub> H <sub>50</sub> Cl <sub>4</sub> N <sub>2</sub> O <sub>2</sub> P <sub>2</sub> Pd                     |
| Formula weight                    | 956.05                                                                                                              |
| Temperature                       | 103(2) K                                                                                                            |
| Wavelength                        | 0.71073 Å                                                                                                           |
| Crystal system                    | Orthorhombic                                                                                                        |
| Space group                       | P2(1)2(1)2                                                                                                          |
| Unit cell dimensions              | a = 12.3208(10) Å $\alpha = 90^\circ$<br>b = 35.000(3) Å $\beta = 90^\circ$<br>c = 10.4586(8) Å $\gamma = 90^\circ$ |
| Volume                            | 4510.0(6) Å <sup>3</sup>                                                                                            |
| Z                                 | 4                                                                                                                   |
| Density (calculated)              | 1.408 Mg/m <sup>3</sup>                                                                                             |
| Absorption coefficient            | 0.723 mm <sup>-1</sup>                                                                                              |
| F(000)                            | 1964                                                                                                                |
| Crystal size                      | 0.40 x 0.24 x 0.14 mm <sup>3</sup>                                                                                  |
| Theta range for data collection   | 1.16 to 30.56°.                                                                                                     |
| Index ranges                      | -17 ≤ h ≤ 17, -47 ≤ k ≤ 50, -13 ≤ l ≤ 14                                                                            |
| Reflections collected             | 41191                                                                                                               |
| Independent reflections           | 13755 [R(int) = 0.0477]                                                                                             |
| Completeness to theta = 30.56°    | 99.5 %                                                                                                              |
| Absorption correction             | Semi-empirical from equivalents                                                                                     |
| Max. and min. transmission        | 0.9055 and 0.7607                                                                                                   |
| Refinement method                 | Full-matrix least-squares on F <sup>2</sup>                                                                         |
| Data / restraints / parameters    | 13755 / 130 / 567                                                                                                   |
| Goodness-of-fit on F <sup>2</sup> | 1.120                                                                                                               |
| Final R indices [I > 2σ(I)]       | R1 = 0.0597, wR2 = 0.1646                                                                                           |
| R indices (all data)              | R1 = 0.0724, wR2 = 0.1782                                                                                           |
| Absolute structure parameter      | 0.01(3)                                                                                                             |
| Largest diff. peak and hole       | 1.827 and -1.005 e.Å <sup>-3</sup>                                                                                  |



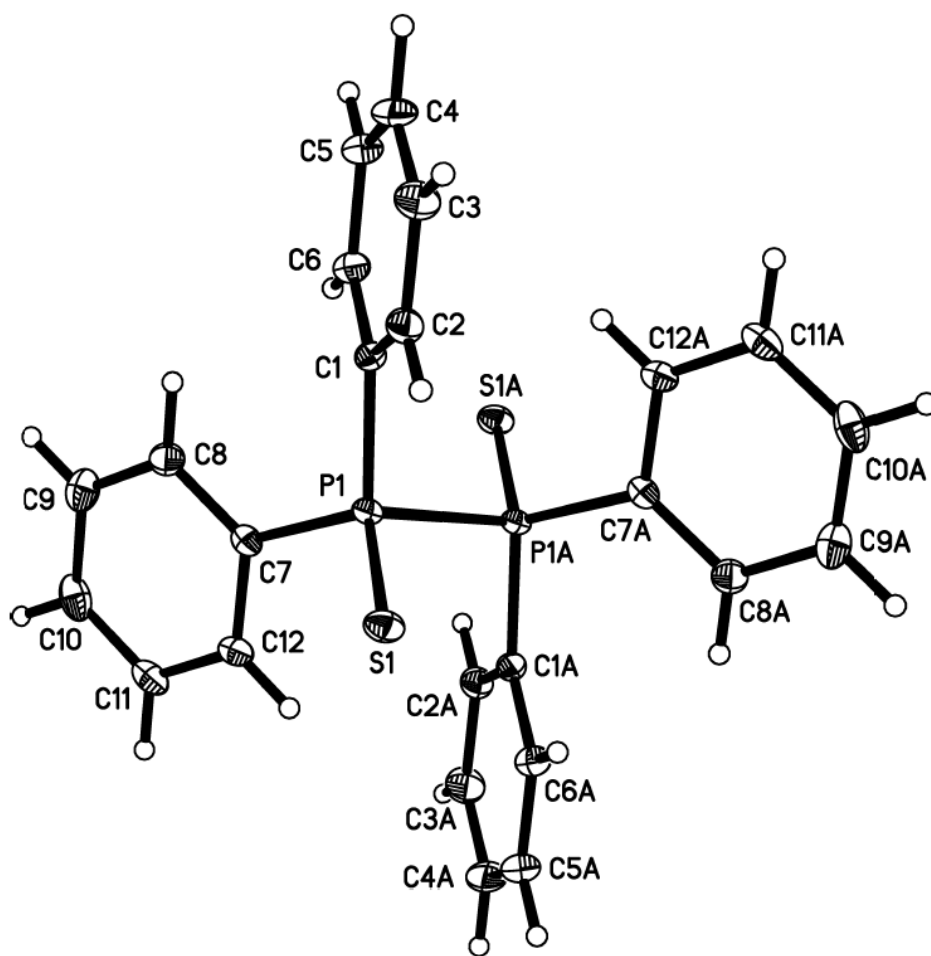

Figure S2. ORTEP illustration of **10'** with thermal ellipsoids drawn at 50% probability level.

**Table S2. Crystal data and structure refinement for compound 10'**

|                                     |                                                                                                                                                                       |
|-------------------------------------|-----------------------------------------------------------------------------------------------------------------------------------------------------------------------|
| Chemical formula                    | C <sub>24</sub> H <sub>20</sub> P <sub>2</sub> S <sub>2</sub>                                                                                                         |
| Formula weight                      | 434.46                                                                                                                                                                |
| Temperature                         | 103(2) K                                                                                                                                                              |
| Wavelength                          | 0.71073 Å                                                                                                                                                             |
| Crystal size                        | 0.300 x 0.320 x 0.420 mm                                                                                                                                              |
| Crystal habit                       | colorless block                                                                                                                                                       |
| Crystal system                      | monoclinic                                                                                                                                                            |
| Space group                         | P 1 2 <sub>1</sub> /c 1                                                                                                                                               |
| Unit cell dimensions                | a = 9.5656(5) Å    α = 90°<br>b = 15.6505(9) Å    β = 96.8115(15)°<br>c = 14.0777(8) Å    γ = 90°                                                                     |
| Volume                              | 2092.6(2) Å <sup>3</sup>                                                                                                                                              |
| Z                                   | 4                                                                                                                                                                     |
| Density (calculated)                | 1.379 g/cm <sup>3</sup>                                                                                                                                               |
| Absorption coefficient              | 0.415 mm <sup>-1</sup>                                                                                                                                                |
| F(000)                              | 904                                                                                                                                                                   |
| Theta range for data collection     | 2.51 to 31.49°                                                                                                                                                        |
| Index ranges                        | -13 ≤ h ≤ 14, -22 ≤ k ≤ 22, -20 ≤ l ≤ 20                                                                                                                              |
| Reflections collected               | 49831                                                                                                                                                                 |
| Independent reflections             | 6912 [R(int) = 0.0769]                                                                                                                                                |
| Coverage of independent reflections | 99.5%                                                                                                                                                                 |
| Absorption correction               | multi-scan                                                                                                                                                            |
| Max. and min. transmission          | 0.8860 and 0.8450                                                                                                                                                     |
| Refinement method                   | Full-matrix least-squares on F <sup>2</sup>                                                                                                                           |
| Refinement program                  | SHELXL-2013 (Sheldrick, 2013)                                                                                                                                         |
| Function minimized                  | Σ w(F <sub>o</sub> <sup>2</sup> - F <sub>c</sub> <sup>2</sup> ) <sup>2</sup>                                                                                          |
| Data / restraints / parameters      | 6912 / 0 / 253                                                                                                                                                        |
| Goodness-of-fit on F <sup>2</sup>   | 1.123                                                                                                                                                                 |
| Δ/σ <sub>max</sub>                  | 0.001                                                                                                                                                                 |
| Final R indices                     | 5061 data; I > 2σ(I)<br>R1 = 0.0487, wR2 = 0.1078<br>all data<br>R1 = 0.0784, wR2 = 0.1237                                                                            |
| Weighting scheme                    | w = 1/[σ <sup>2</sup> (F <sub>o</sub> <sup>2</sup> ) + (0.0458P) <sup>2</sup> + 1.7634P]<br>where P = (F <sub>o</sub> <sup>2</sup> + 2F <sub>c</sub> <sup>2</sup> )/3 |
| Largest diff. peak and hole         | 0.596 and -0.416 eÅ <sup>-3</sup>                                                                                                                                     |
| R.M.S. deviation from mean          | 0.099 eÅ <sup>-3</sup>                                                                                                                                                |

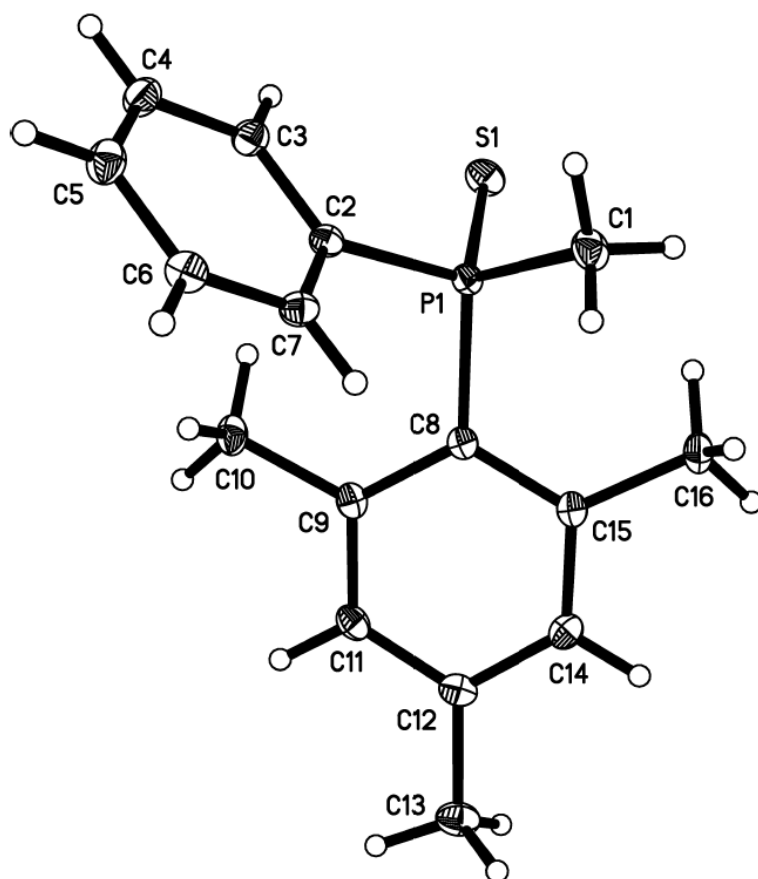

Figure S3. ORTEP illustration of (*S*)-**14a** with thermal ellipsoids drawn at 50% probability level.

**Table S3. Crystal data and structure refinement for compound (S)-14**

|                                     |                                                                                     |                              |
|-------------------------------------|-------------------------------------------------------------------------------------|------------------------------|
| Chemical formula                    | C <sub>16</sub> H <sub>19</sub> PS                                                  |                              |
| Formula weight                      | 274.34                                                                              |                              |
| Temperature                         | 103(2) K                                                                            |                              |
| Wavelength                          | 0.71073 Å                                                                           |                              |
| Crystal size                        | 0.080 x 0.300 x 0.420 mm                                                            |                              |
| Crystal habit                       | colorless plate                                                                     |                              |
| Crystal system                      | orthorhombic                                                                        |                              |
| Space group                         | P 21 21 21                                                                          |                              |
| Unit cell dimensions                | a = 8.6479(2) Å                                                                     | $\alpha = 90^\circ$          |
|                                     | b = 9.9545(4) Å                                                                     | $\beta = 90^\circ$           |
|                                     | c = 16.8563(7) Å                                                                    | $\gamma = 90^\circ$          |
| Volume                              | 1451.08(9) Å <sup>3</sup>                                                           |                              |
| Z                                   | 4                                                                                   |                              |
| Density (calculated)                | 1.256 g/cm <sup>3</sup>                                                             |                              |
| Absorption coefficient              | 0.314 mm <sup>-1</sup>                                                              |                              |
| F(000)                              | 584                                                                                 |                              |
| Theta range for data collection     | 3.17 to 35.08°                                                                      |                              |
| Index ranges                        | -12 ≤ h ≤ 13, -15 ≤ k ≤ 16, -27 ≤ l ≤ 10                                            |                              |
| Reflections collected               | 18262                                                                               |                              |
| Independent reflections             | 6388 [R(int) = 0.0431]                                                              |                              |
| Coverage of independent reflections | 99.7%                                                                               |                              |
| Absorption correction               | multi-scan                                                                          |                              |
| Max. and min. transmission          | 0.9750 and 0.8800                                                                   |                              |
| Refinement method                   | Full-matrix least-squares on F <sup>2</sup>                                         |                              |
| Refinement program                  | SHELXL-2013 (Sheldrick, 2013)                                                       |                              |
| Function minimized                  | $\Sigma w(F_o^2 - F_c^2)^2$                                                         |                              |
| Data / restraints / parameters      | 6388 / 0 / 167                                                                      |                              |
| Goodness-of-fit on F <sup>2</sup>   | 1.029                                                                               |                              |
| $\Delta/\sigma_{\max}$              | 0.001                                                                               |                              |
| Final R indices                     | 5583 data; I > 2σ(I)                                                                | R1 = 0.0400,<br>wR2 = 0.0874 |
|                                     | all data                                                                            | R1 = 0.0497,<br>wR2 = 0.0924 |
| Weighting scheme                    | $w = 1/[\sigma^2(F_o^2) + (0.0443P)^2 + 0.0499P]$<br>where $P = (F_o^2 + 2F_c^2)/3$ |                              |
| Absolute structure parameter        | 0.0(0)                                                                              |                              |
| Largest diff. peak and hole         | 0.398 and -0.297 eÅ <sup>-3</sup>                                                   |                              |
| R.M.S. deviation from mean          | 0.064 eÅ <sup>-3</sup>                                                              |                              |

# 14. $^{31}\text{P}\{^1\text{H}\}$ , $^1\text{H}$ , $^{13}\text{C}$ NMR spectra and chiral HPLC charts

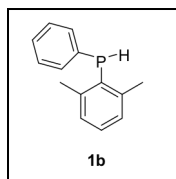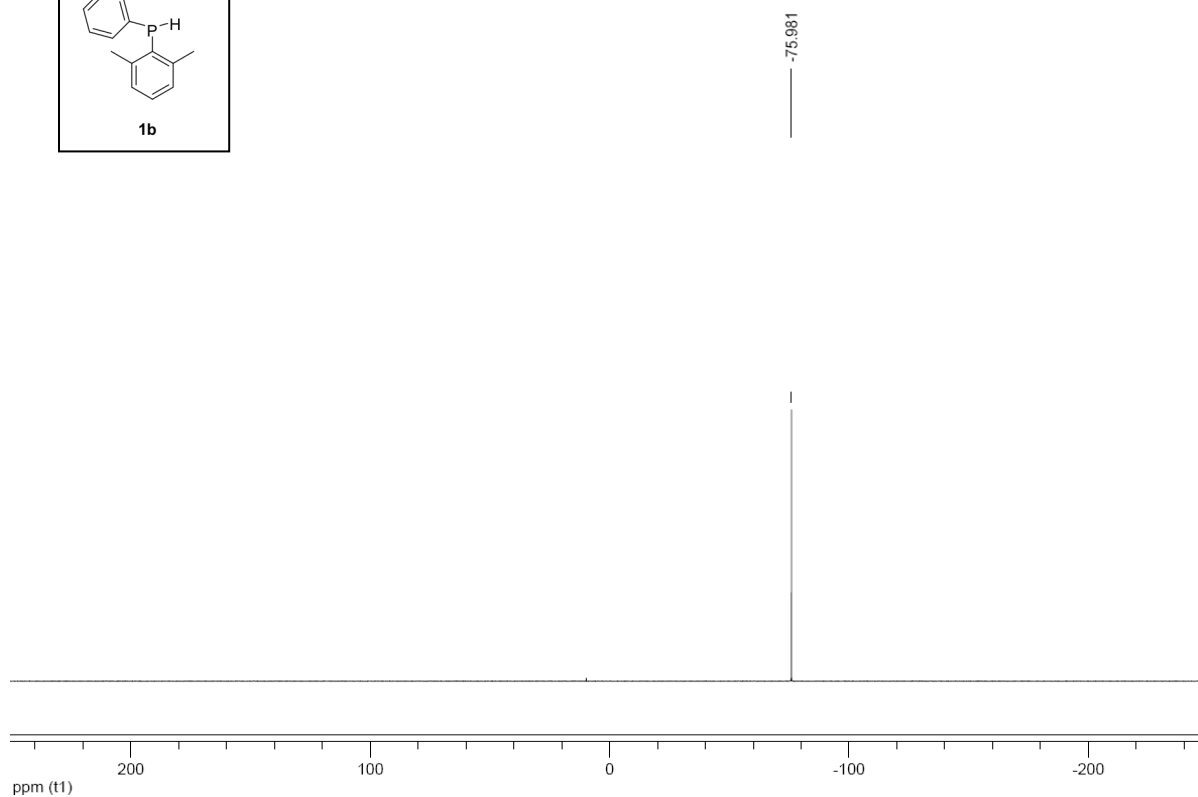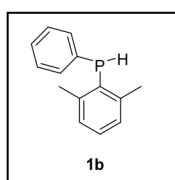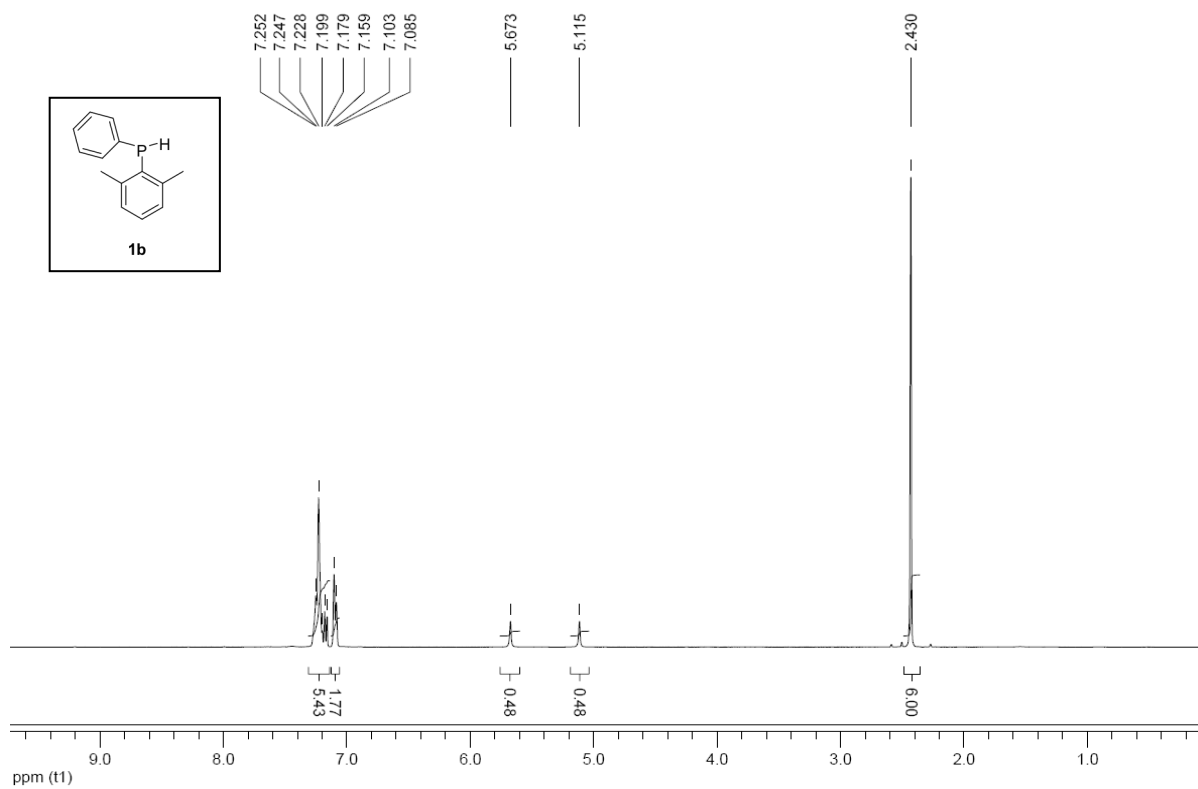

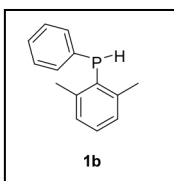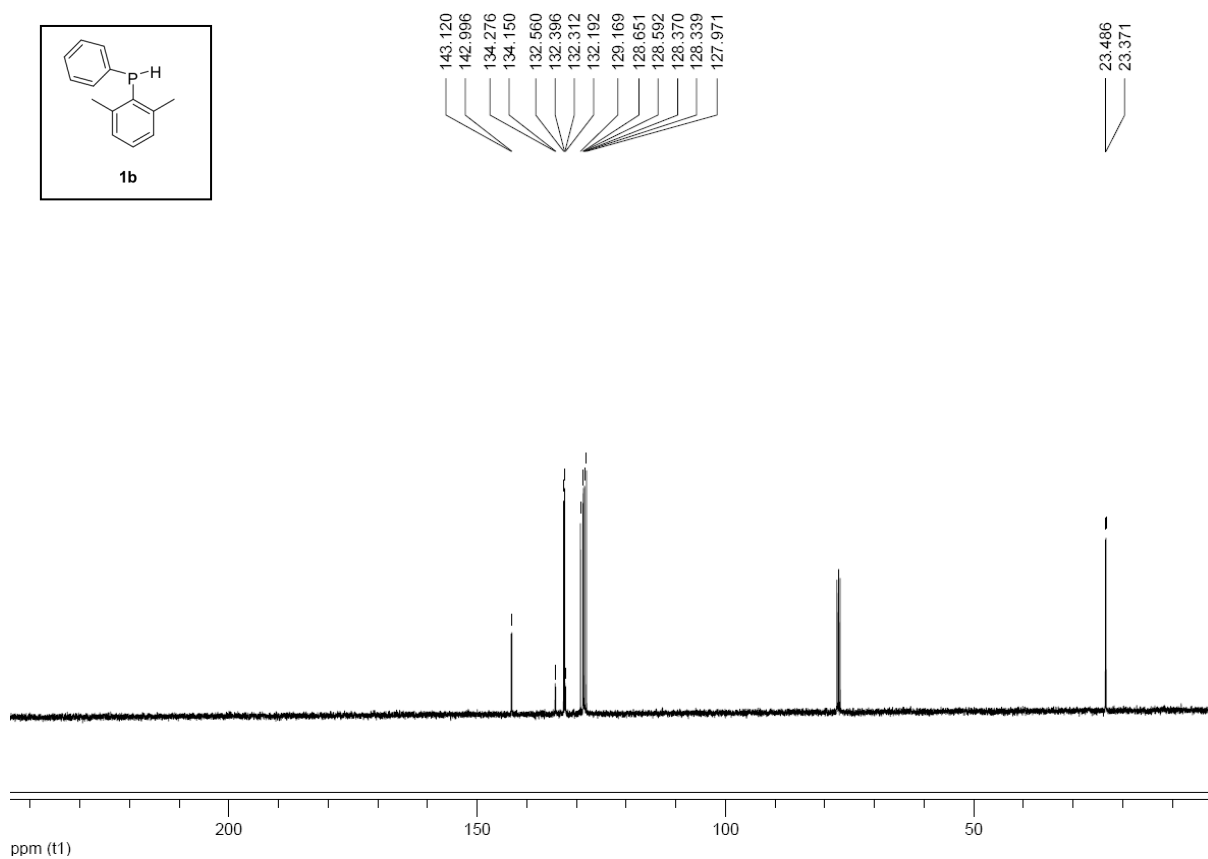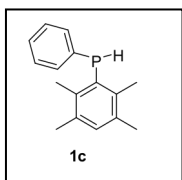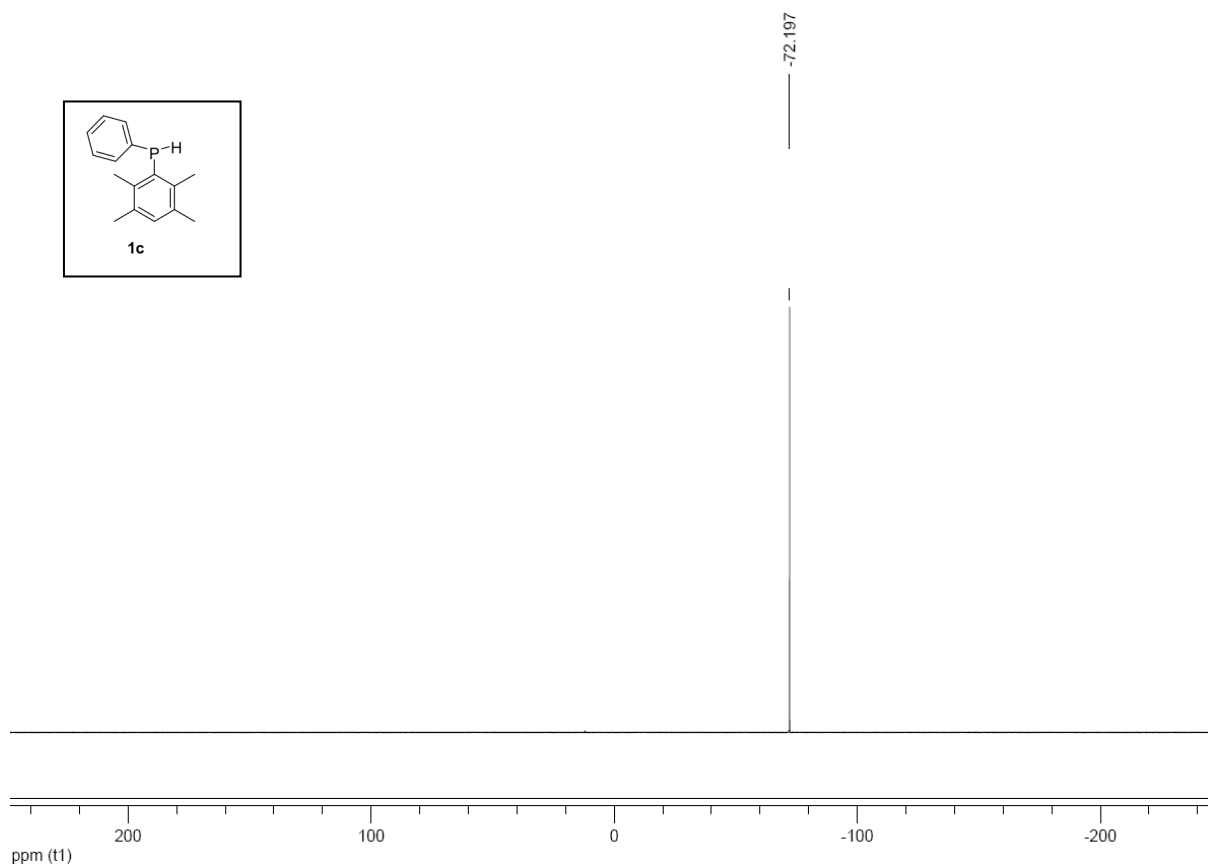

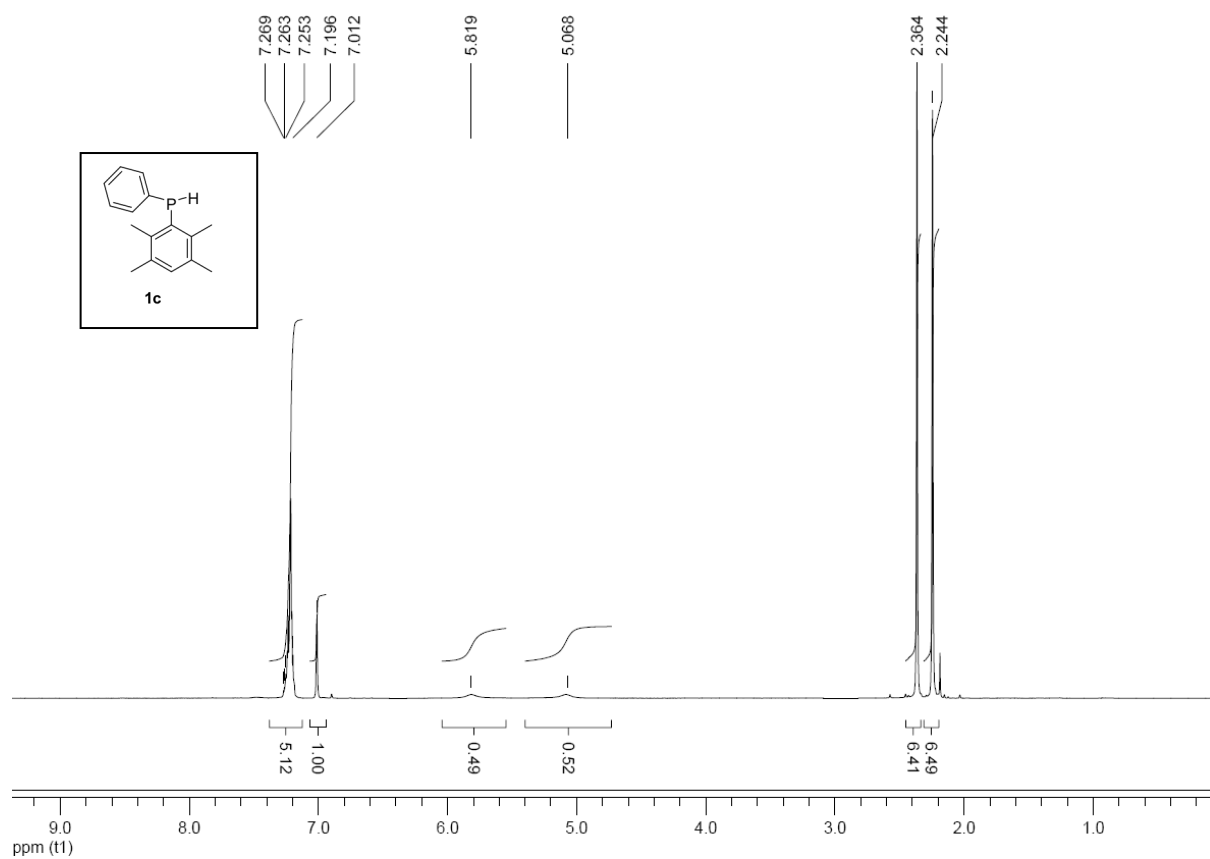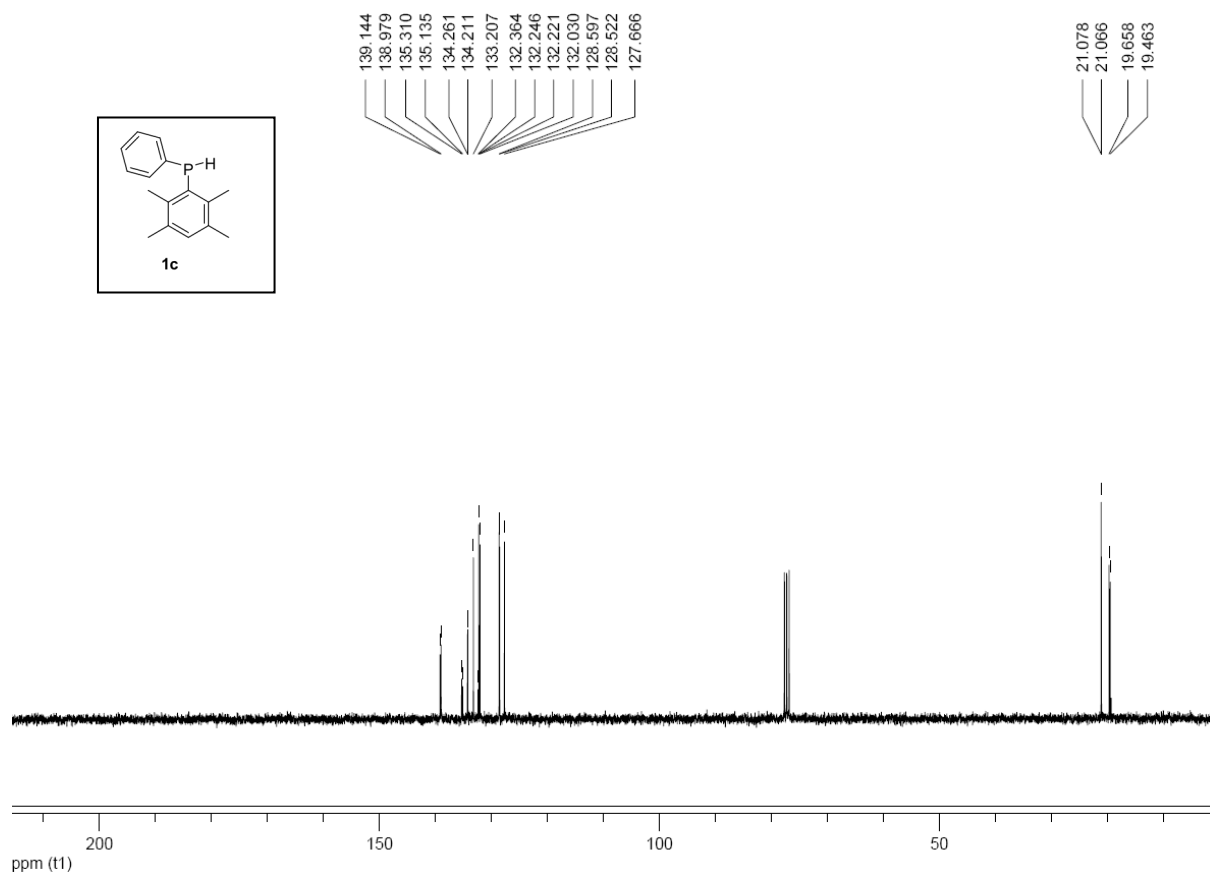

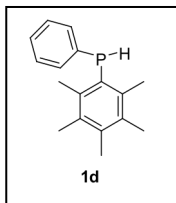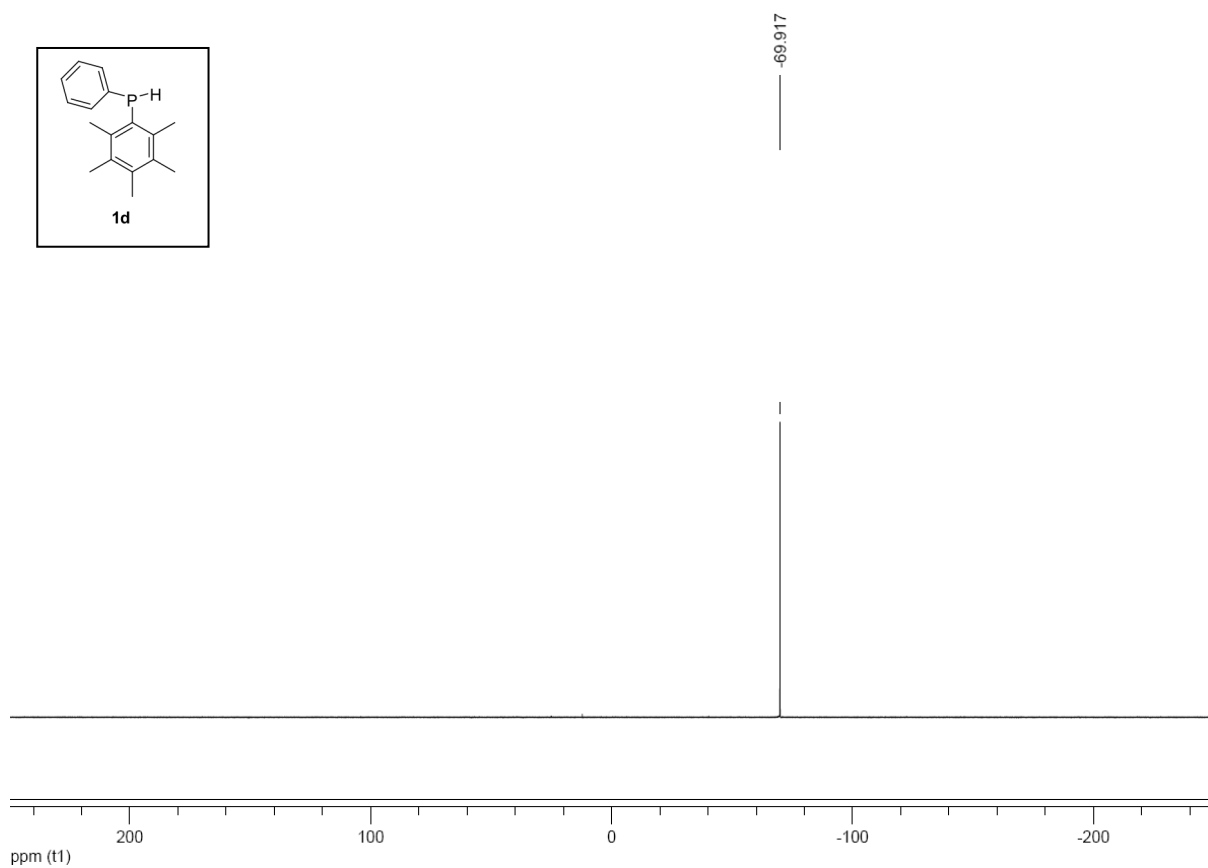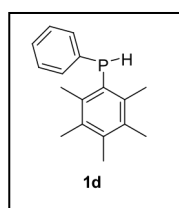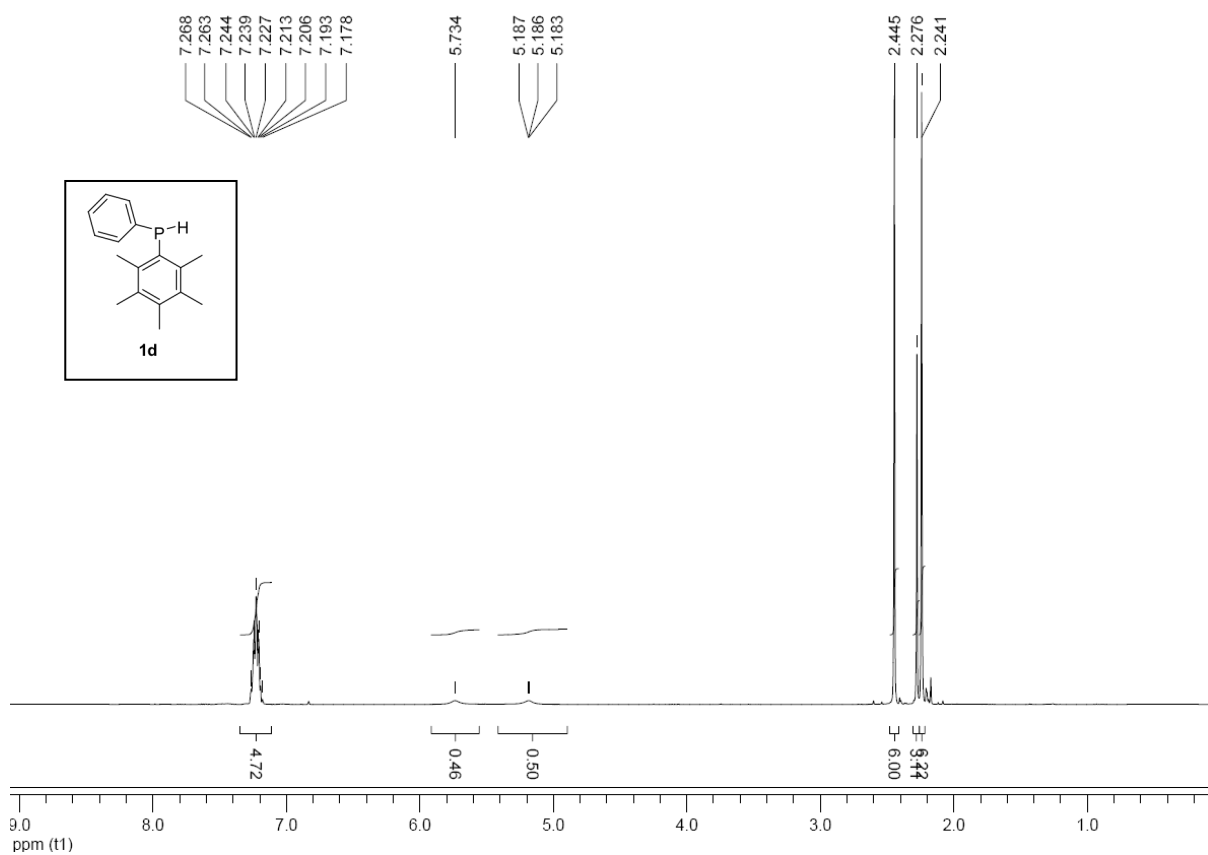



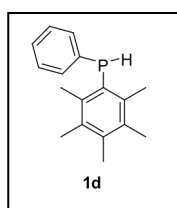

138.854  
138.731  
136.809  
135.860  
135.723  
133.241  
133.206  
131.960  
131.801  
129.290  
129.196  
128.563  
128.509  
127.498

20.921  
20.765  
17.388

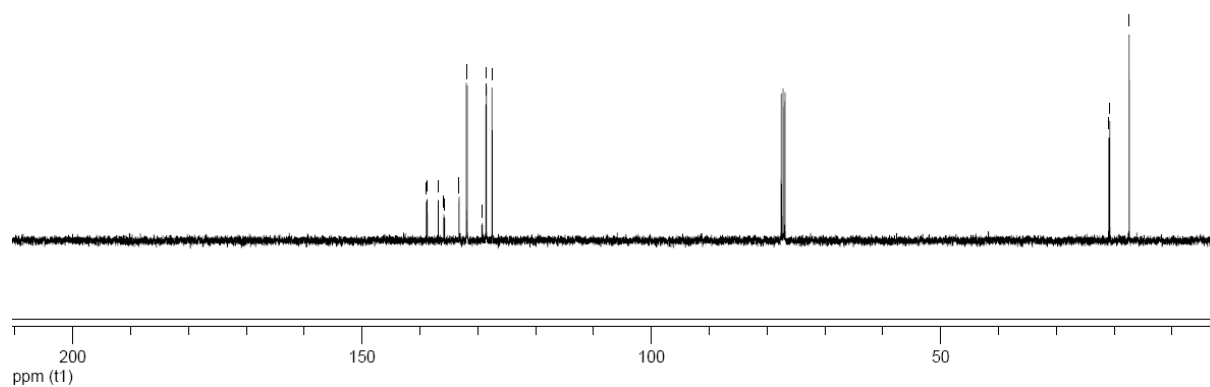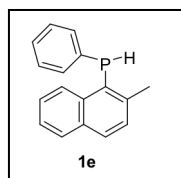

-79.589

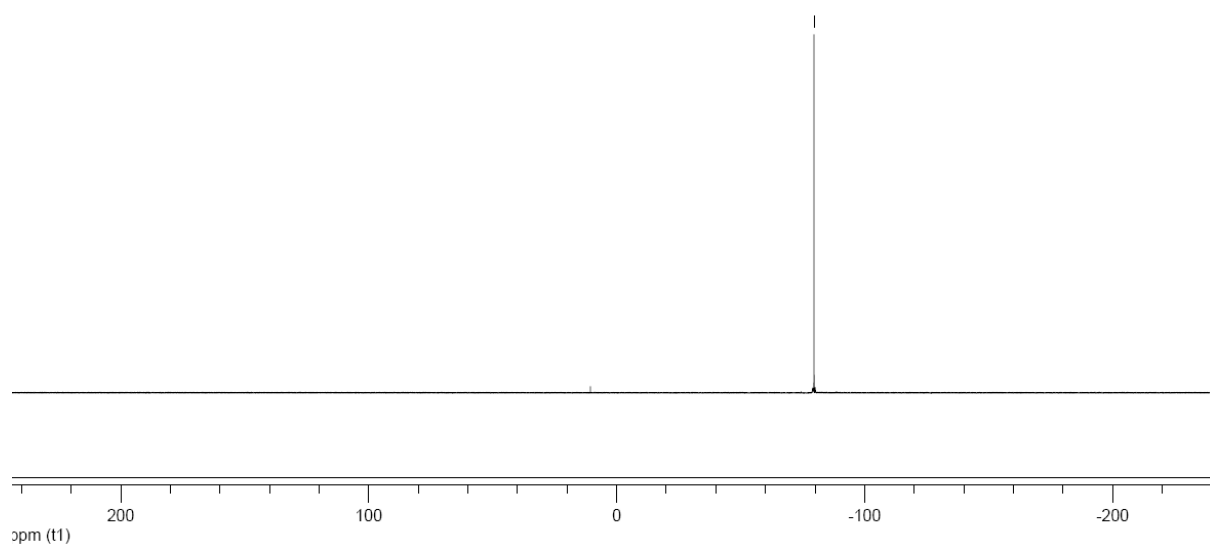

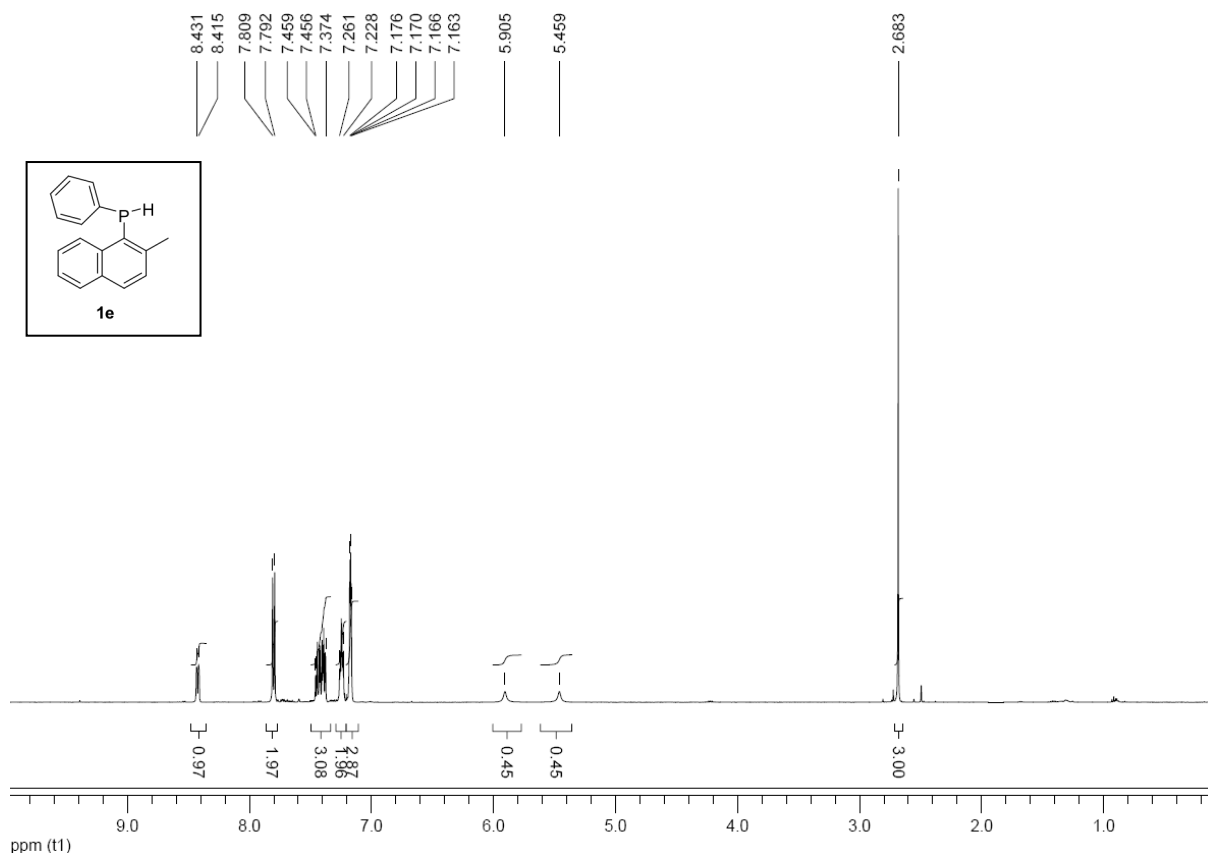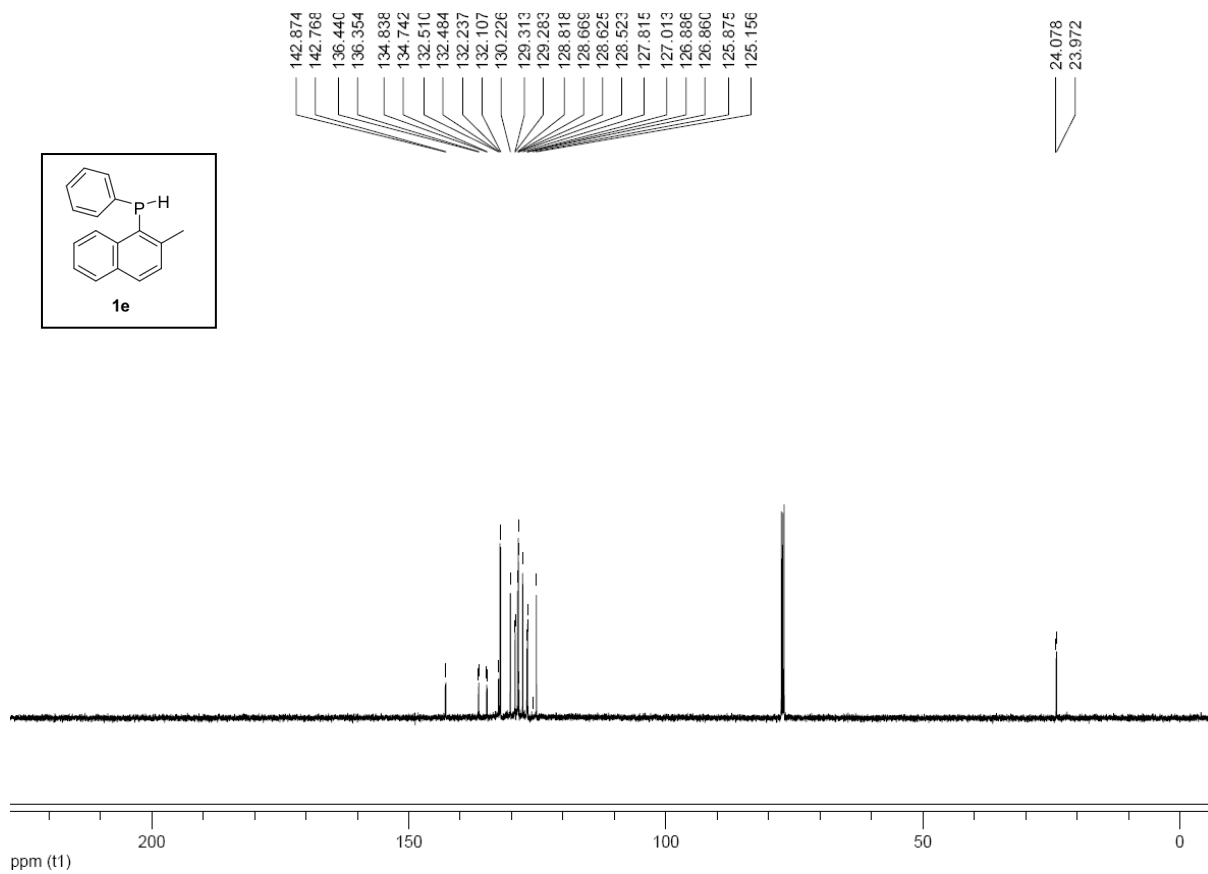

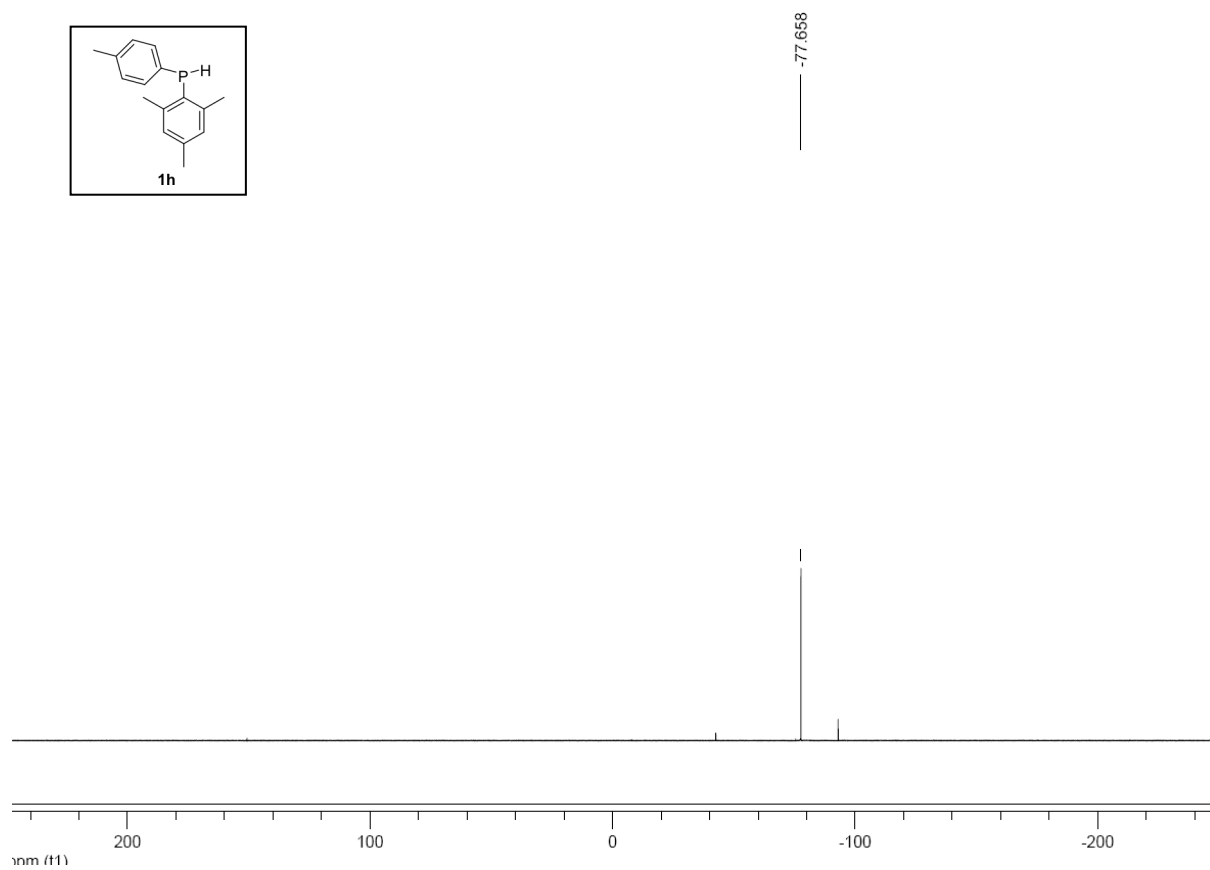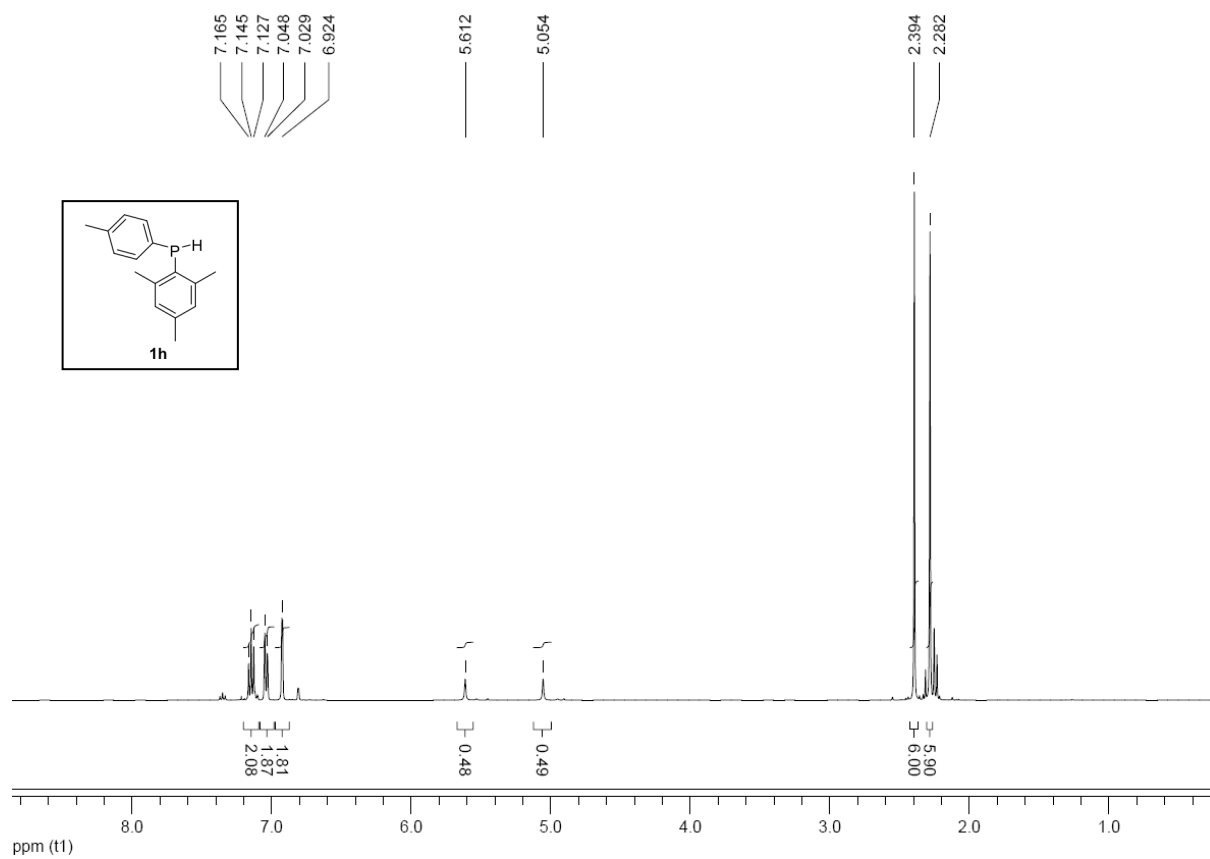

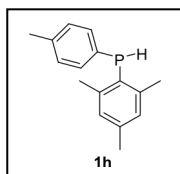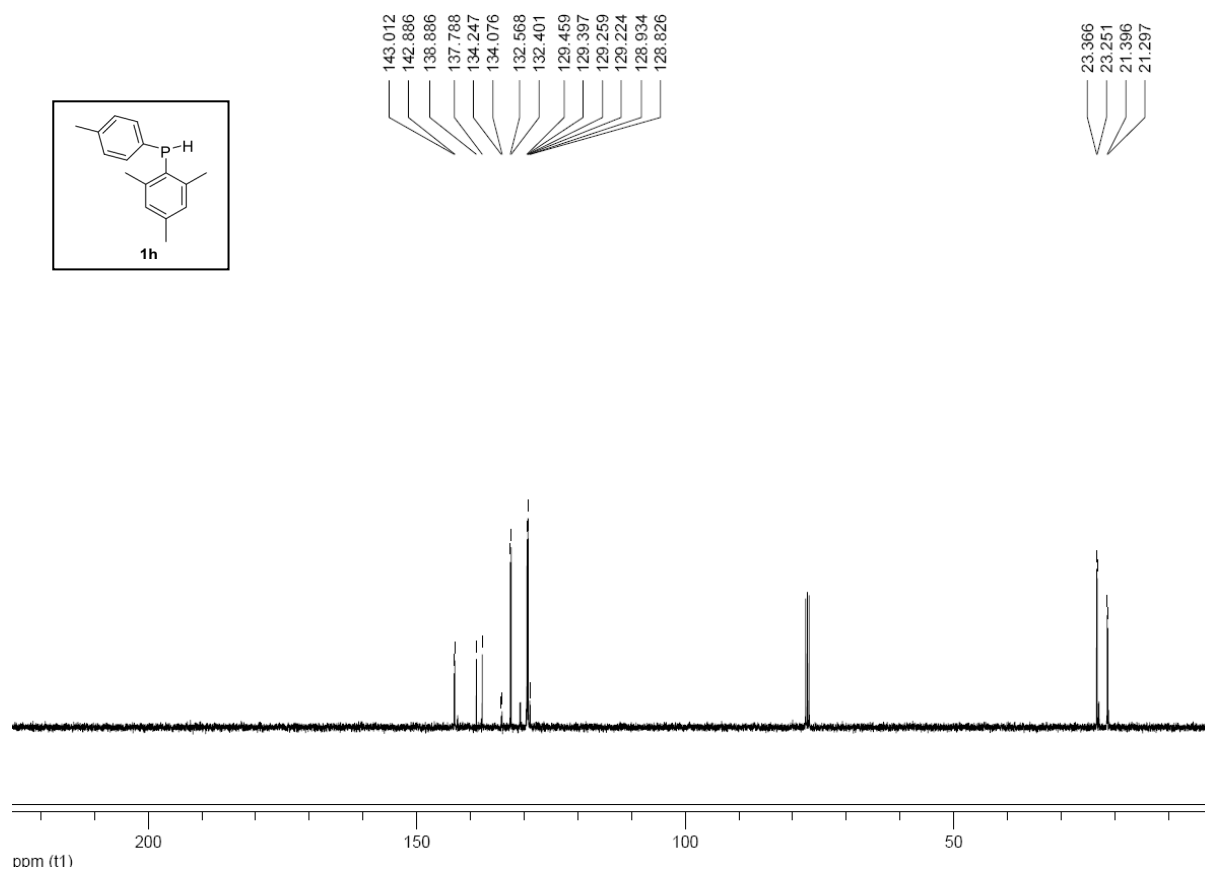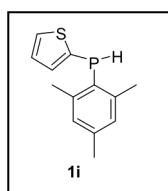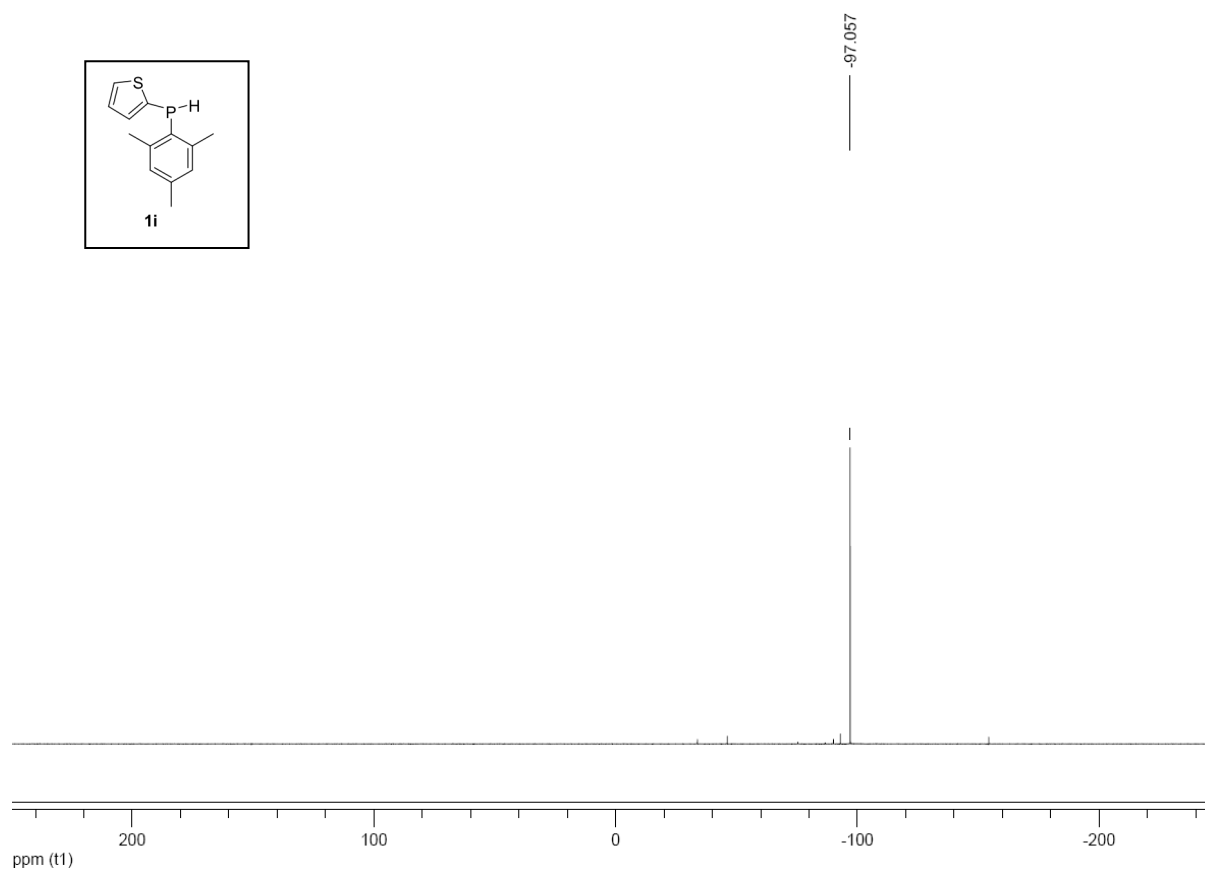

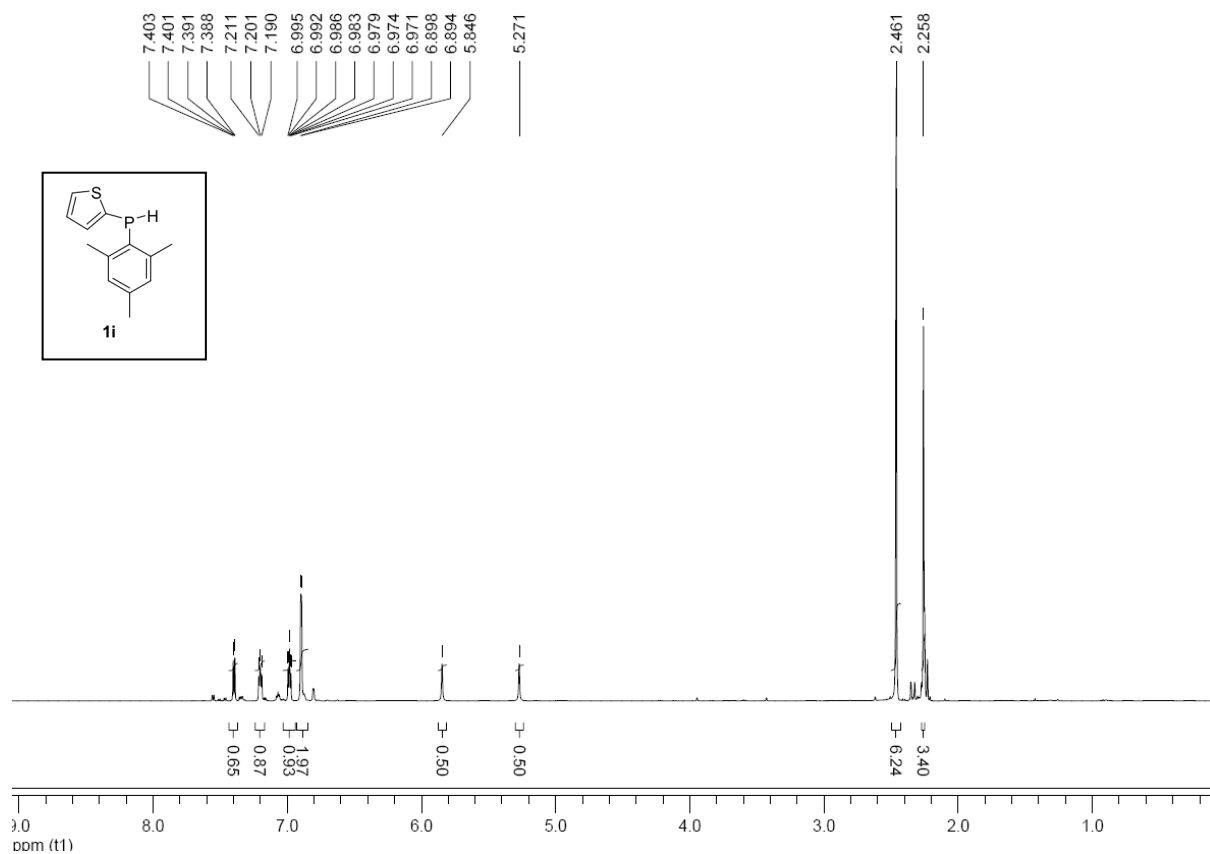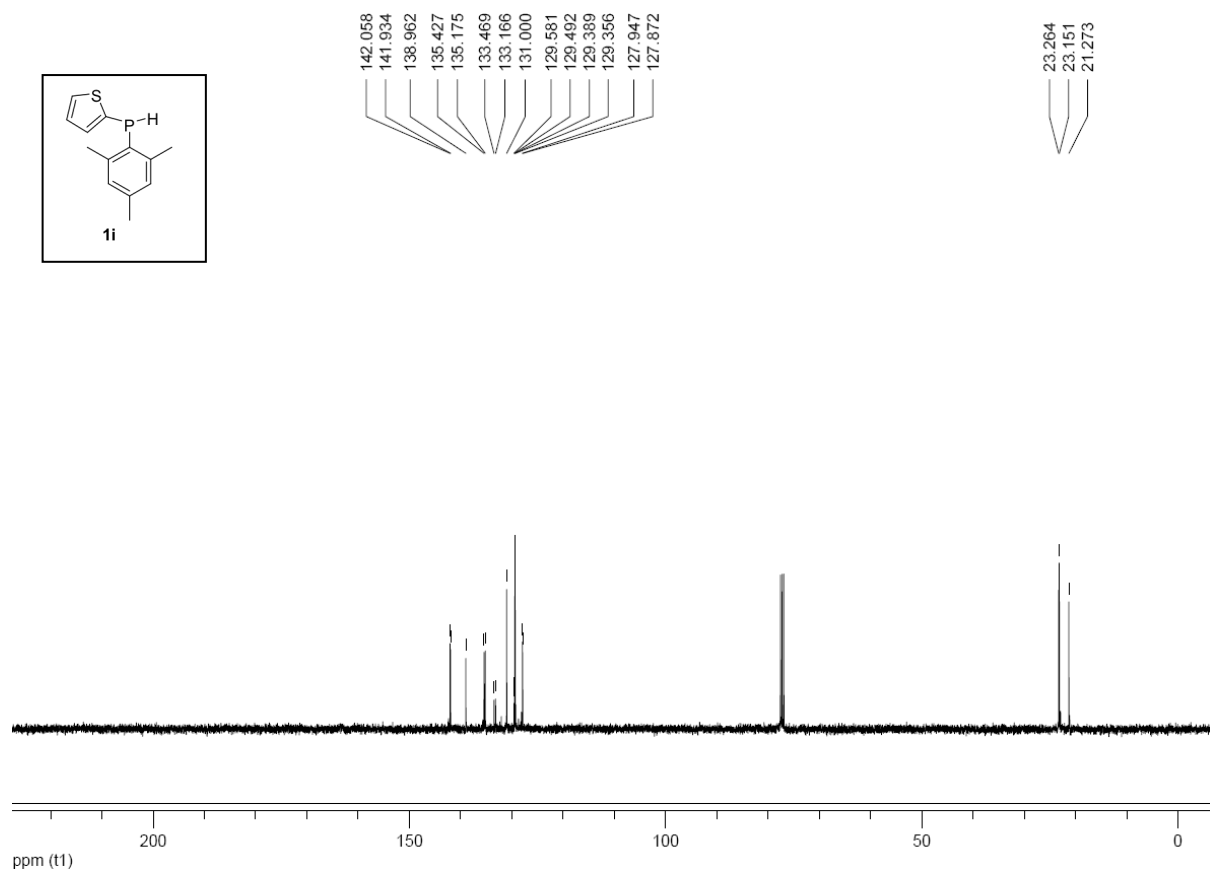

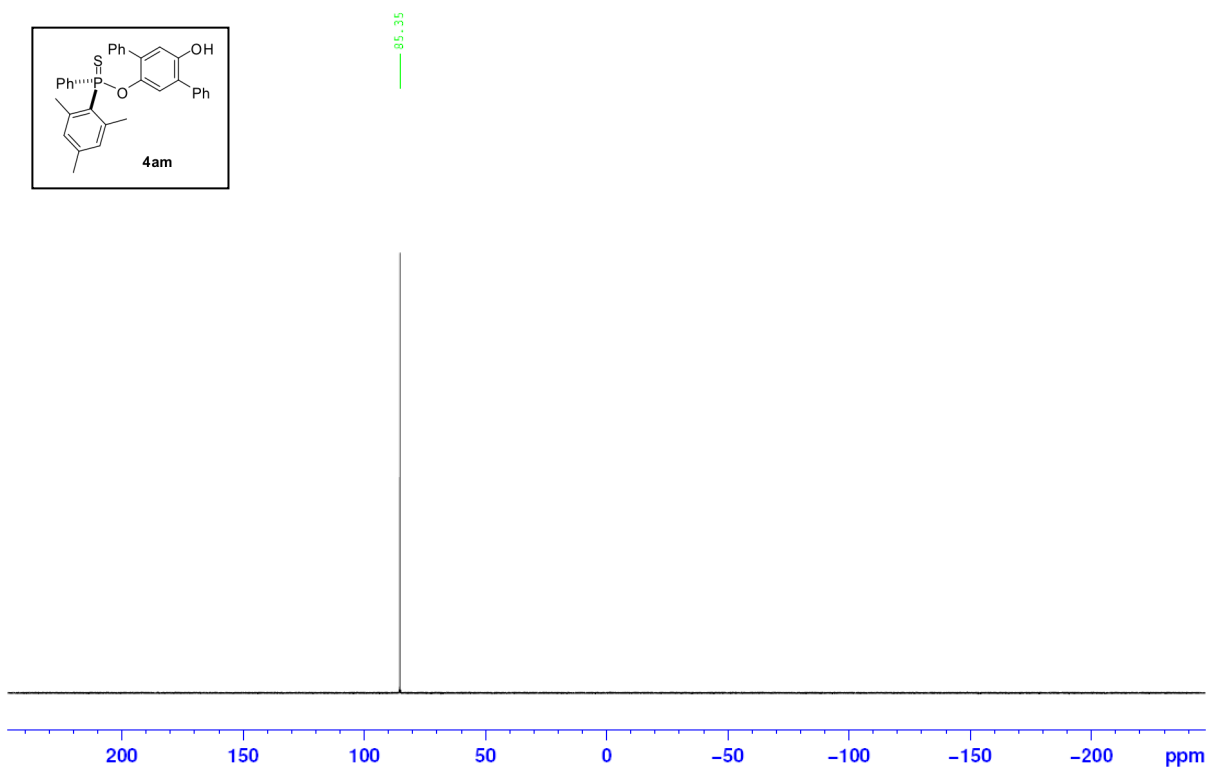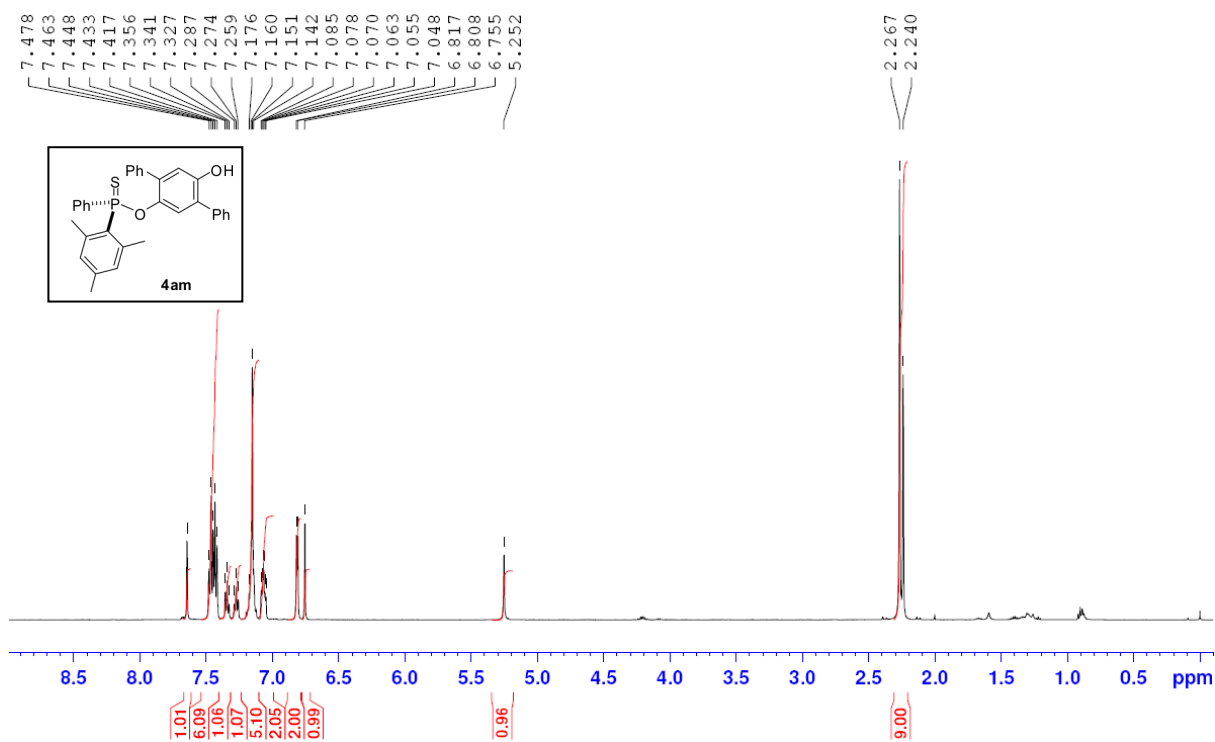

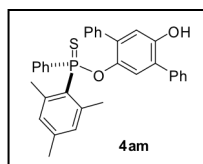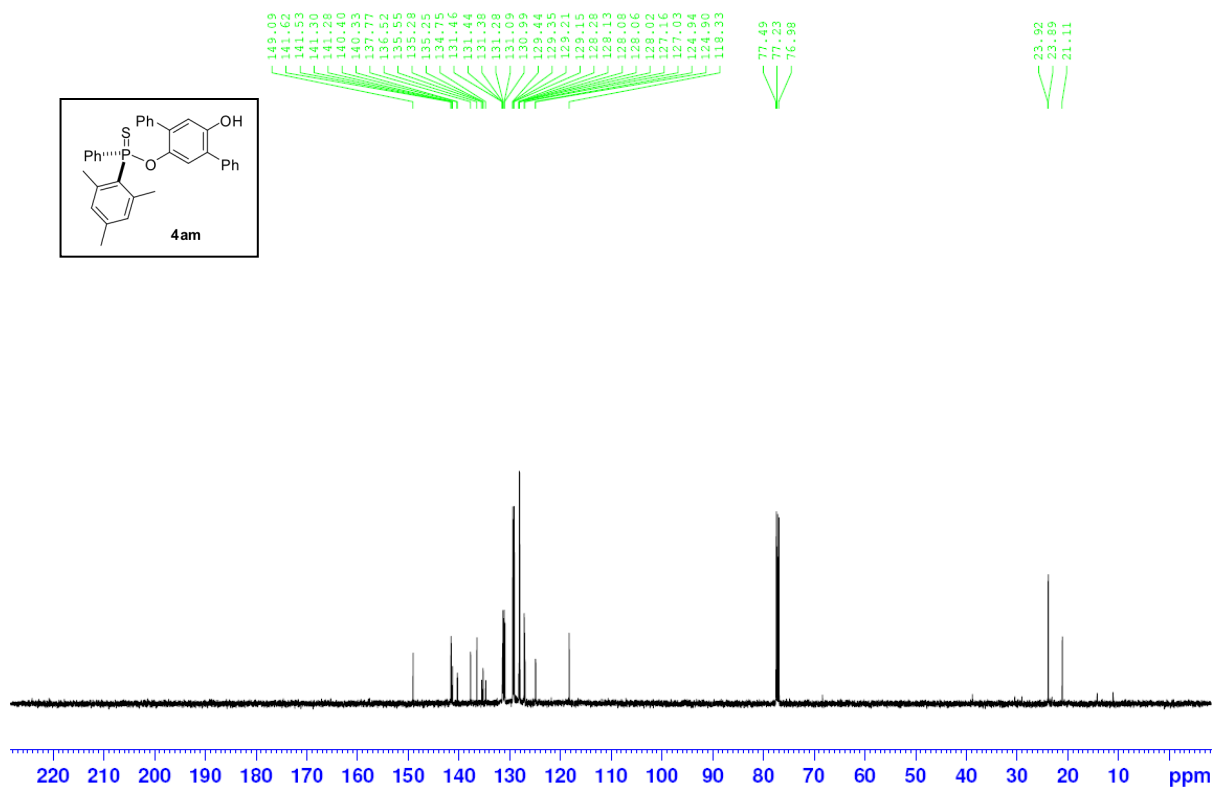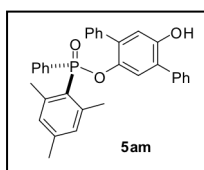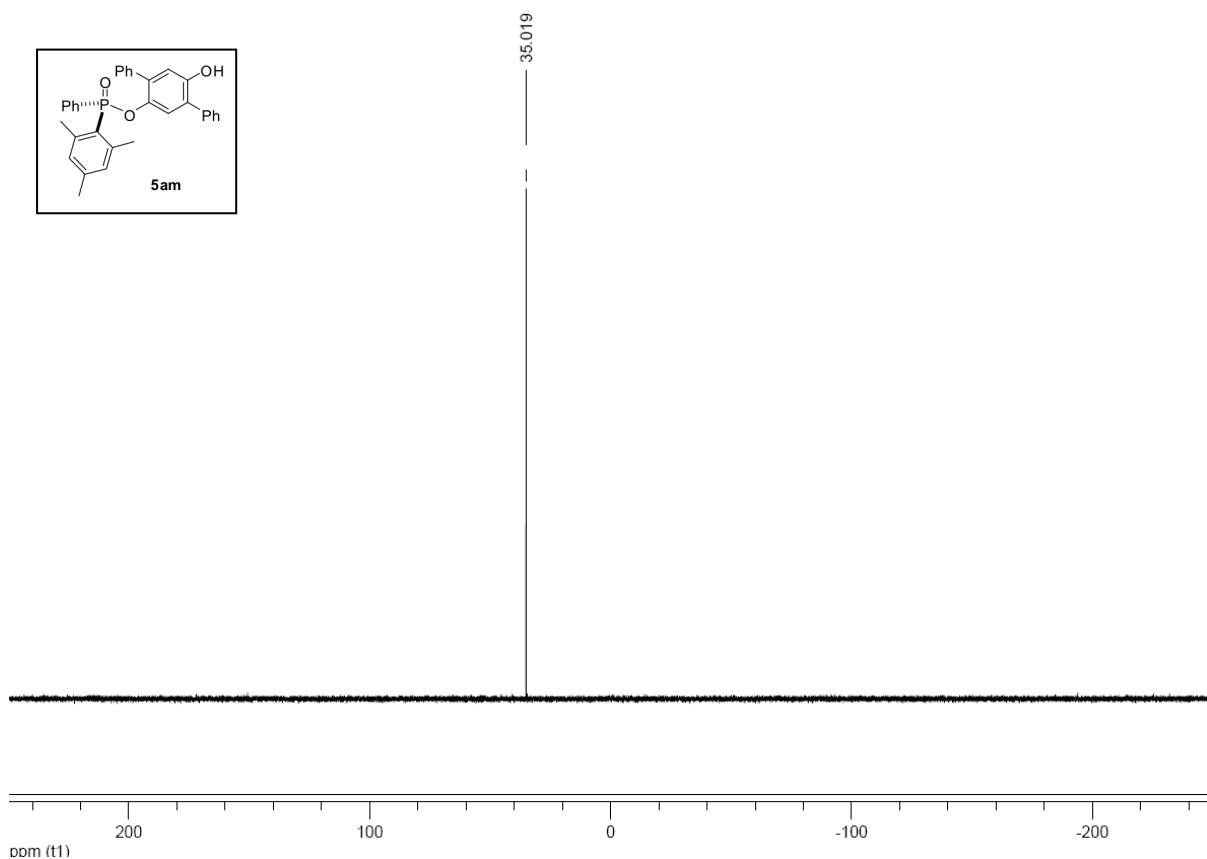

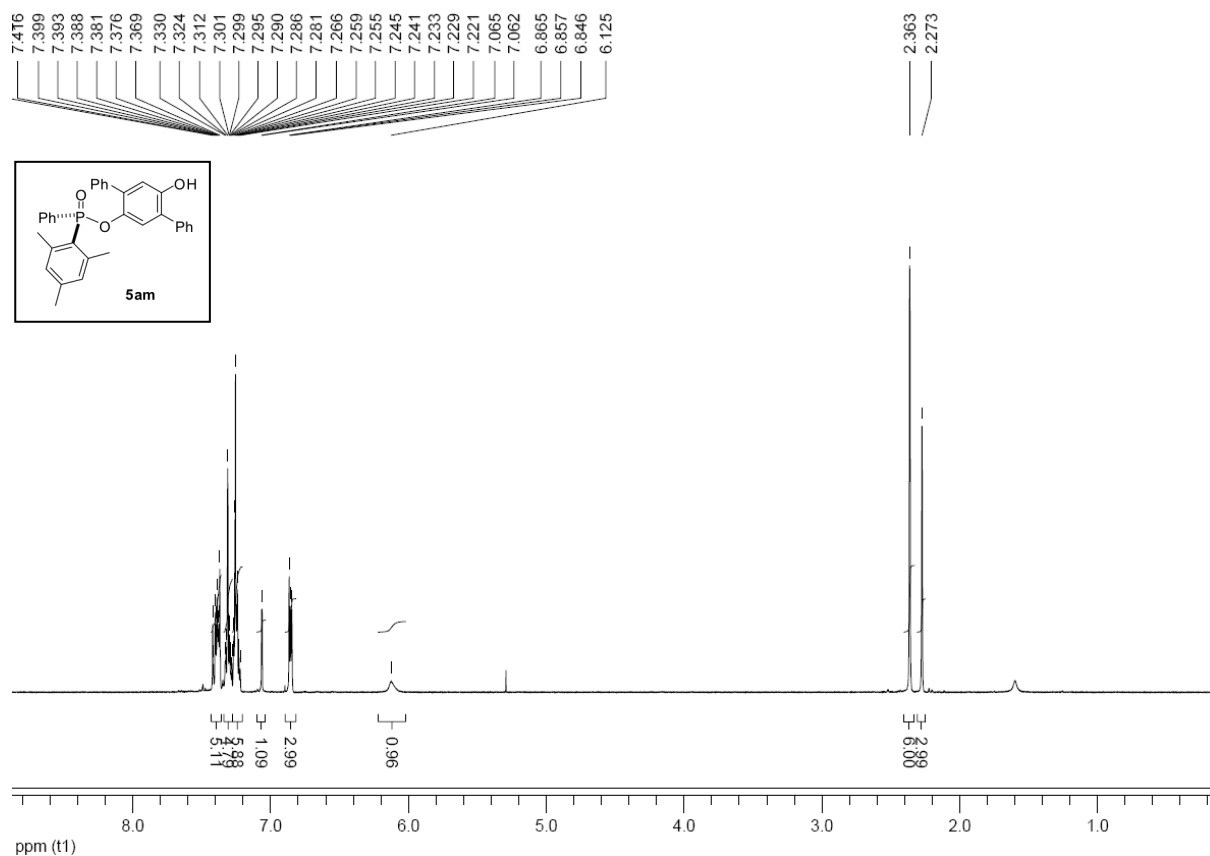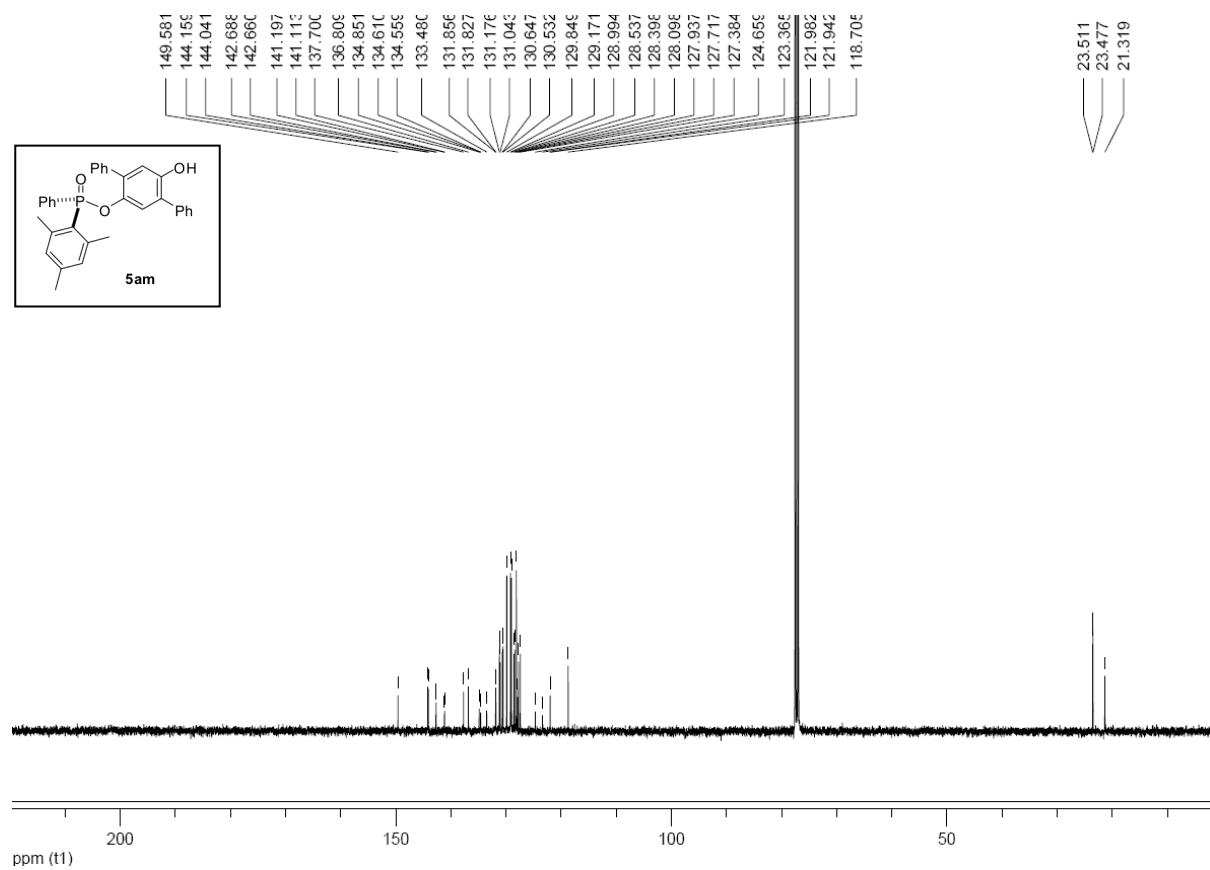



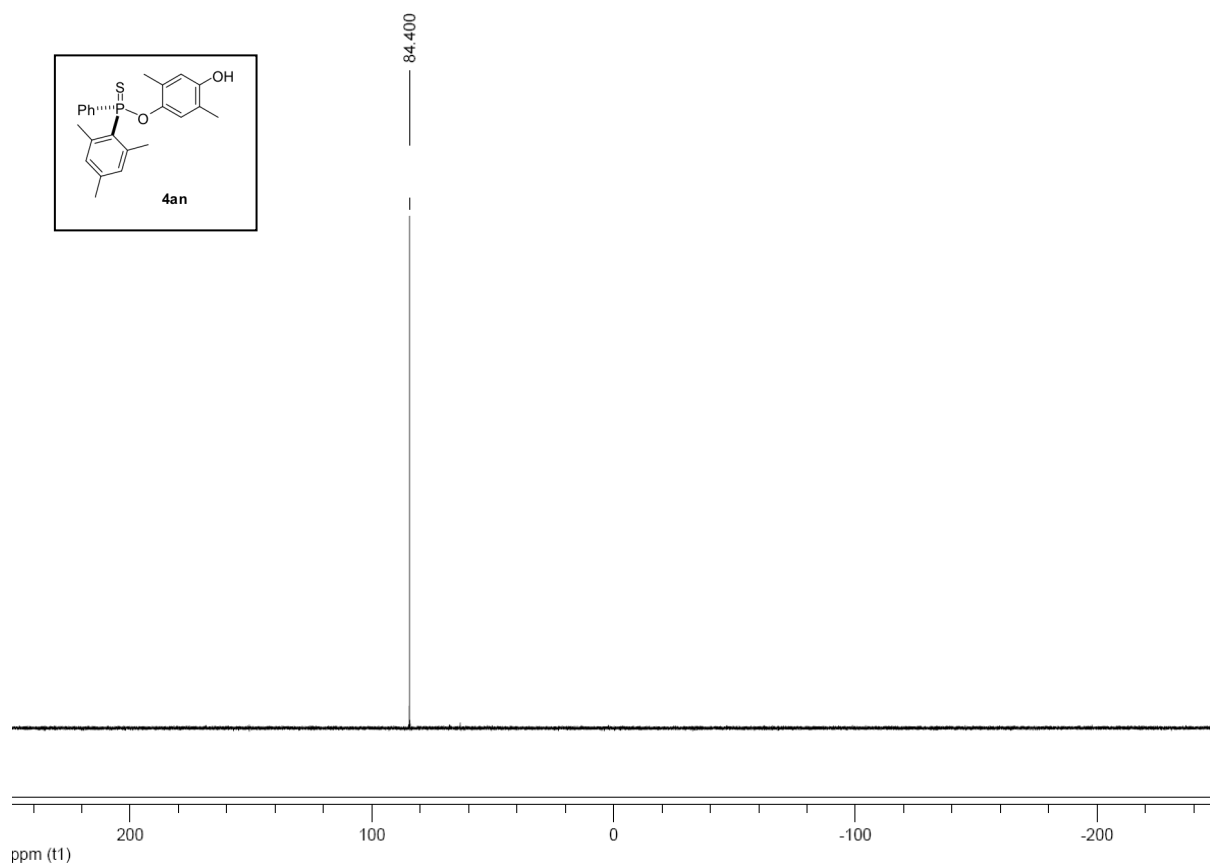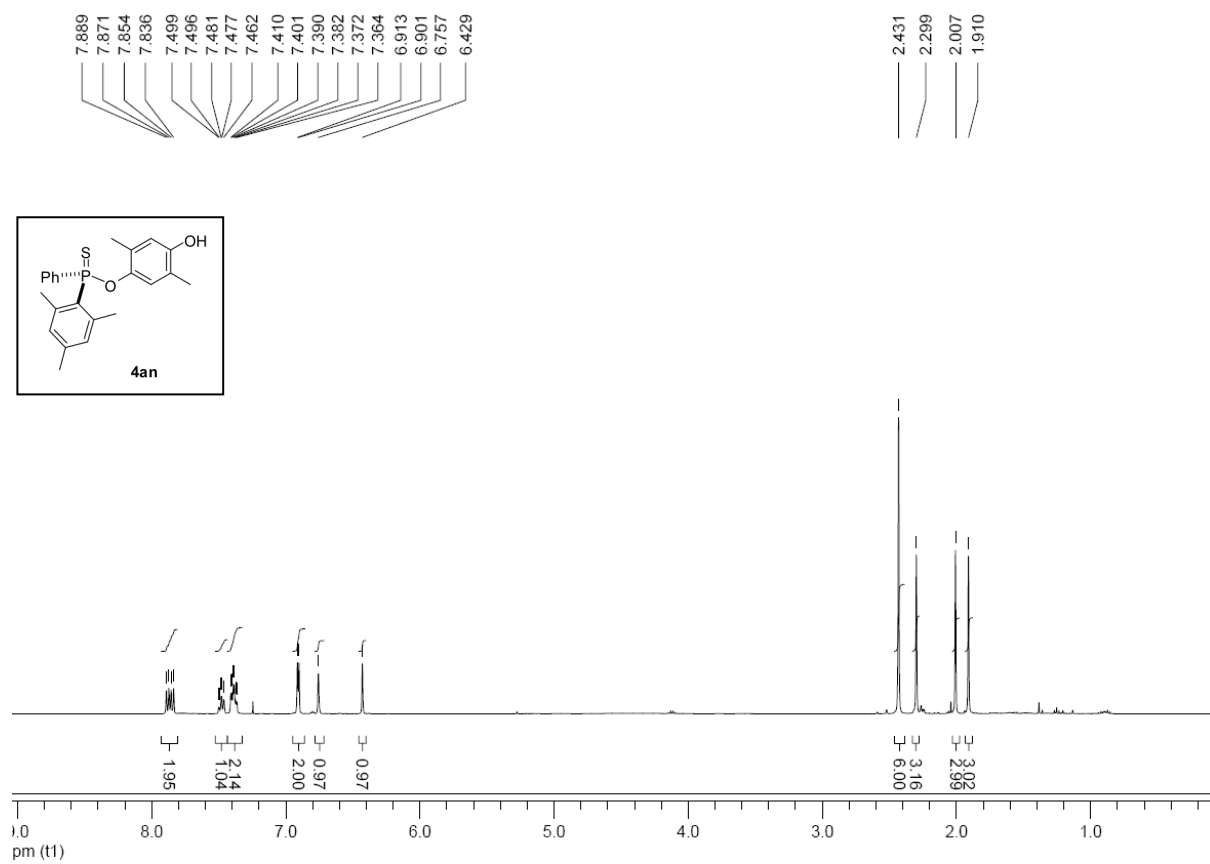

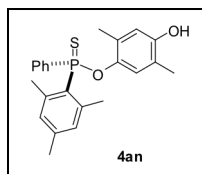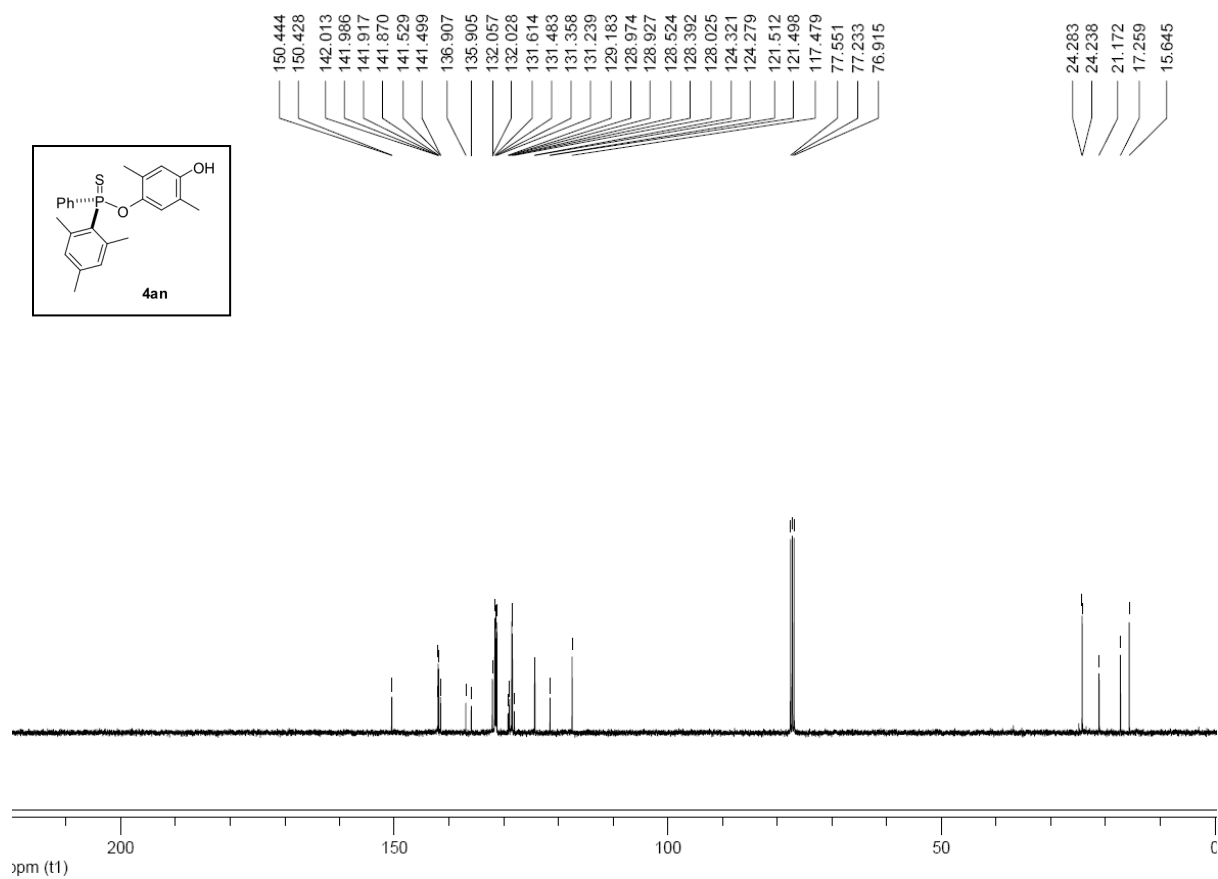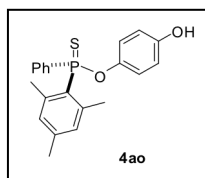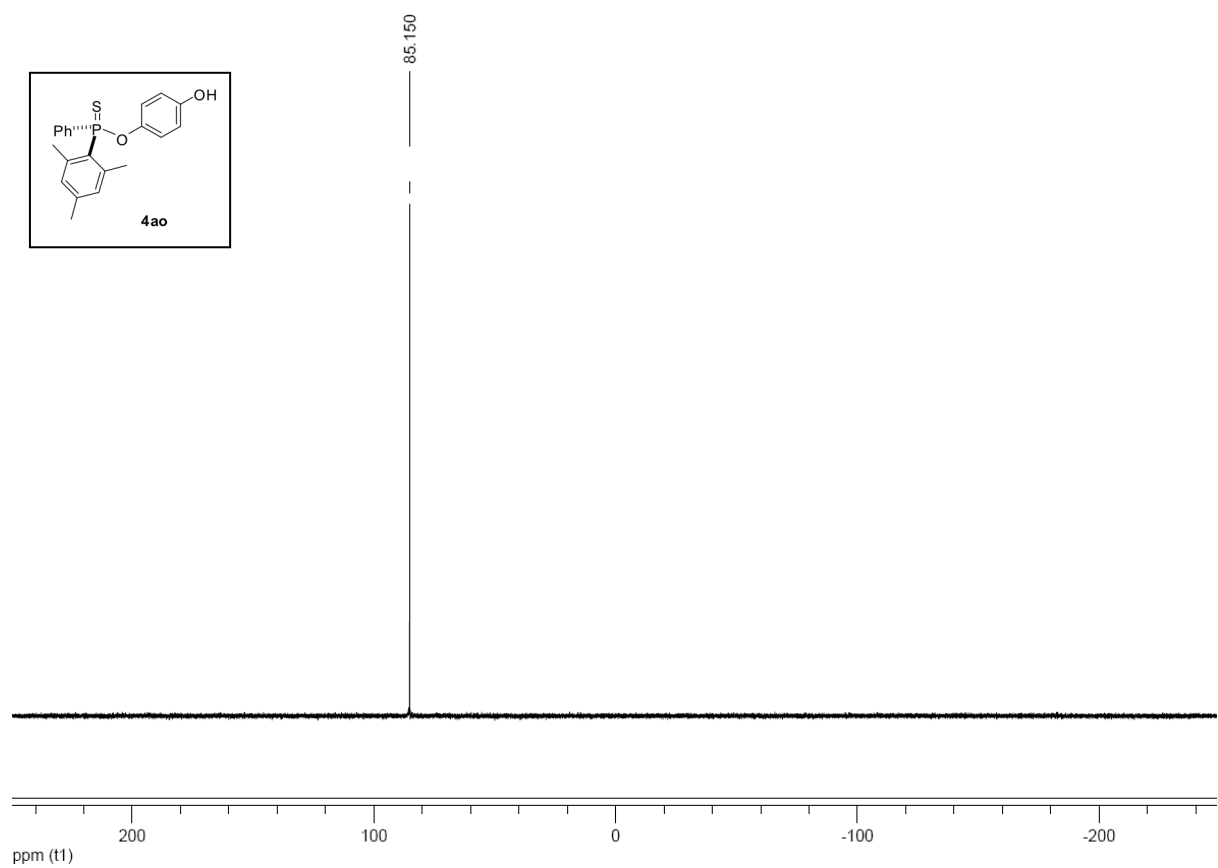

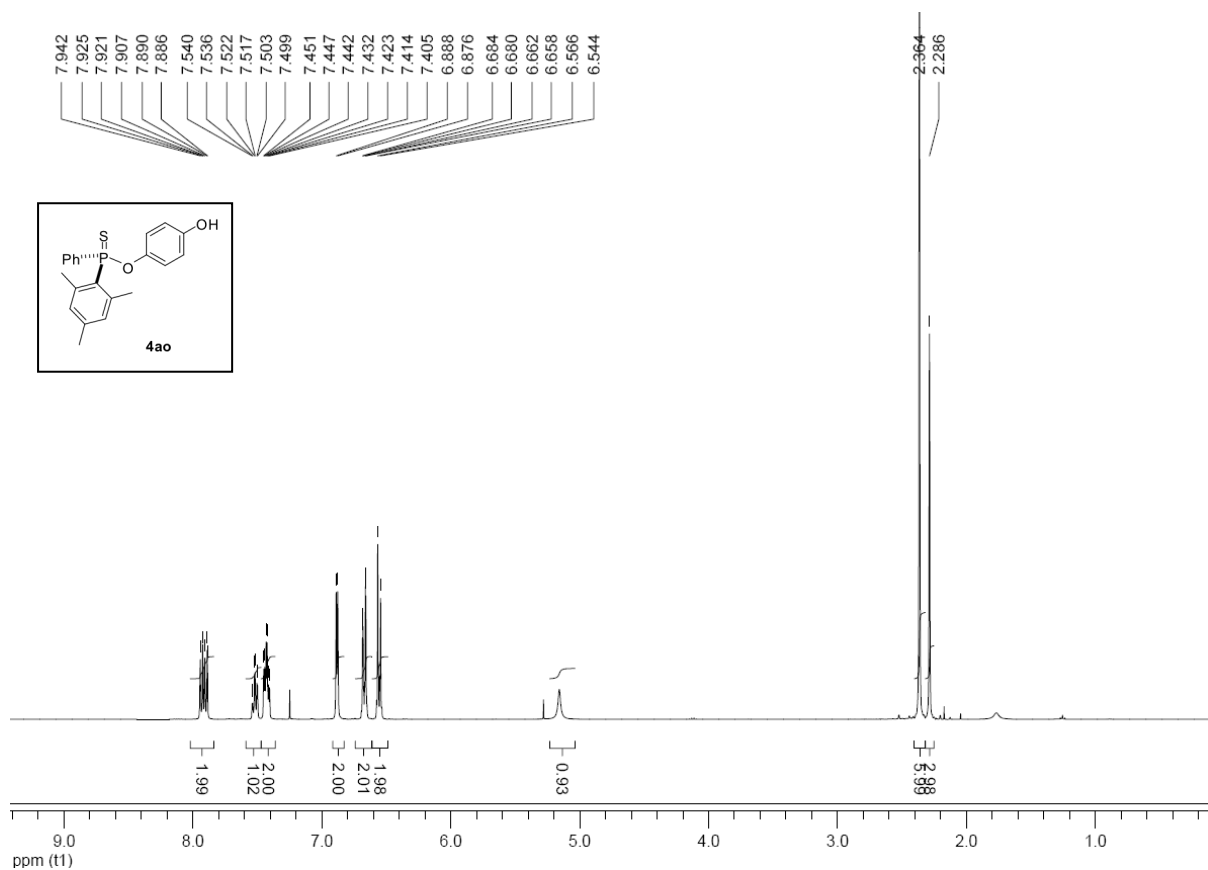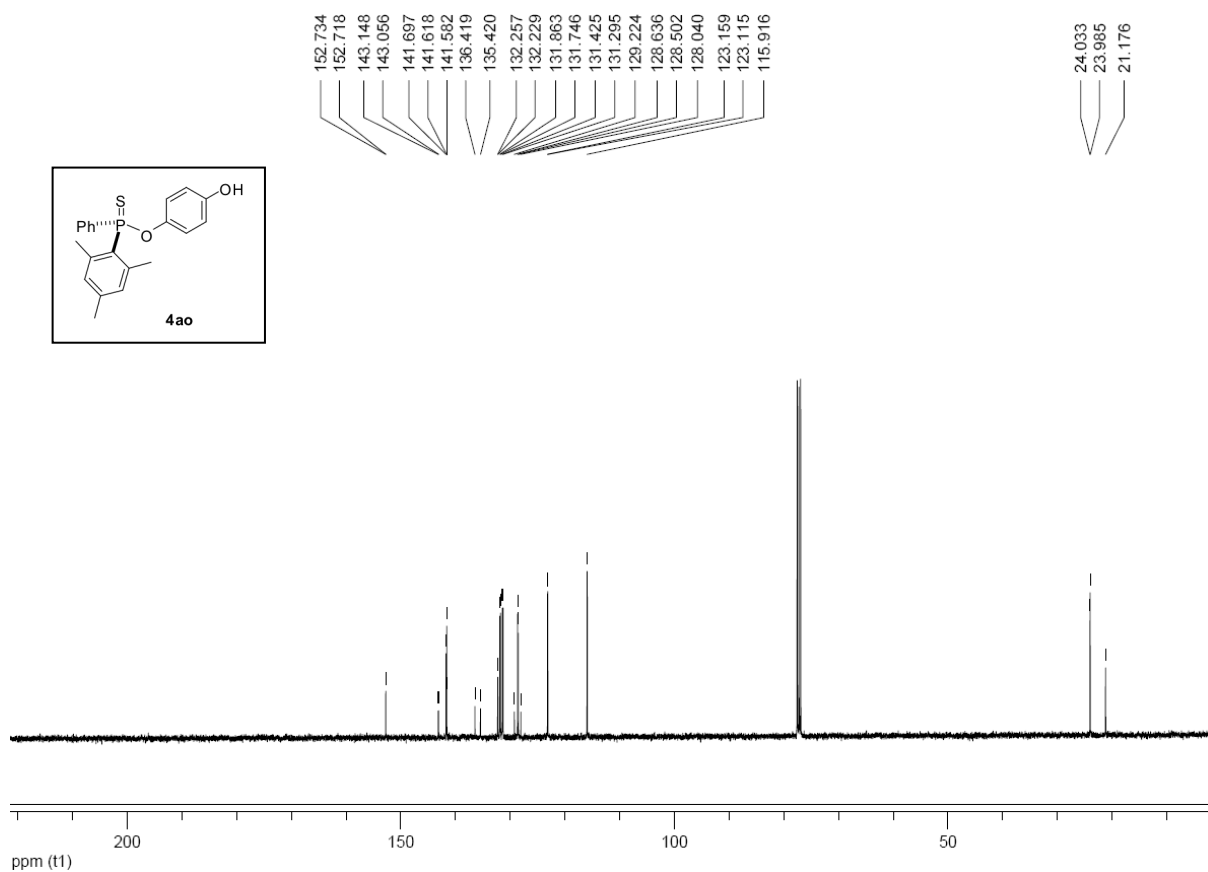

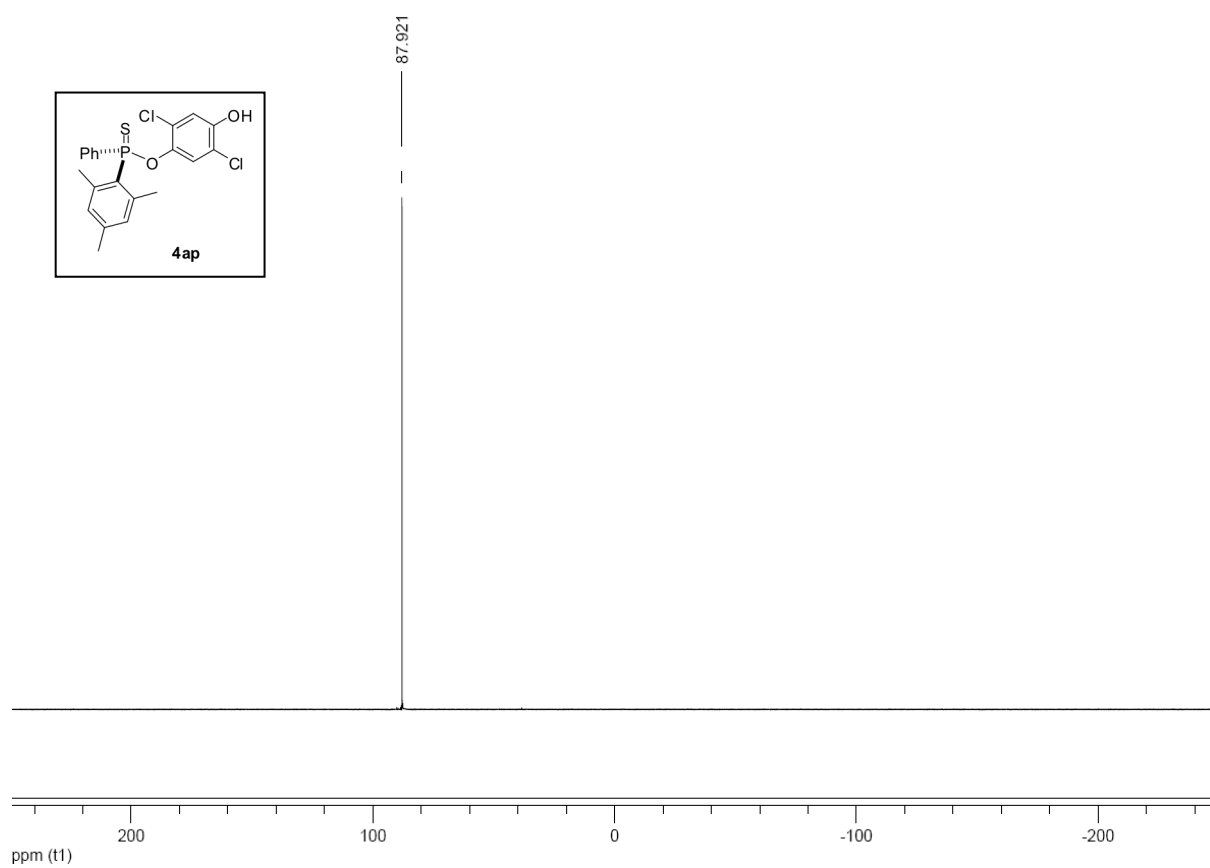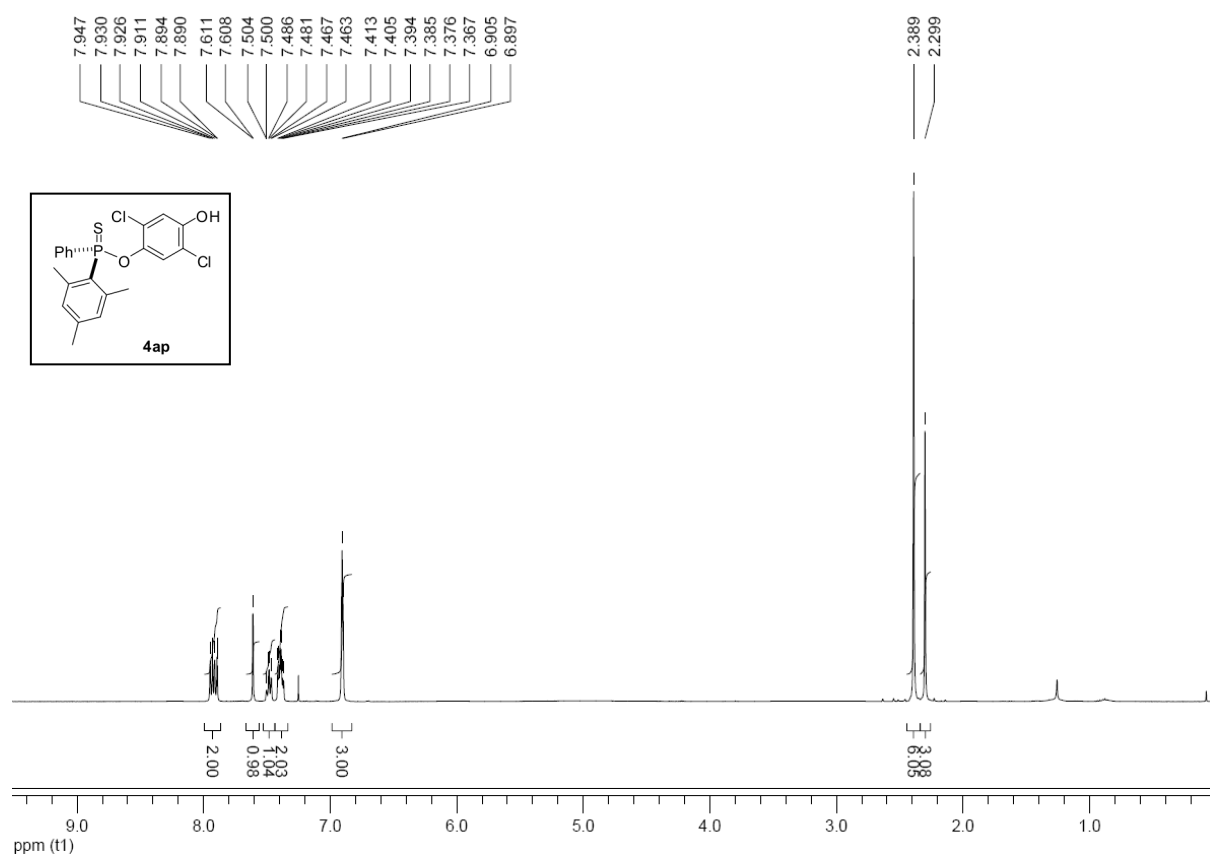

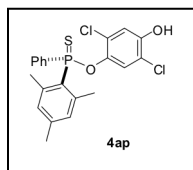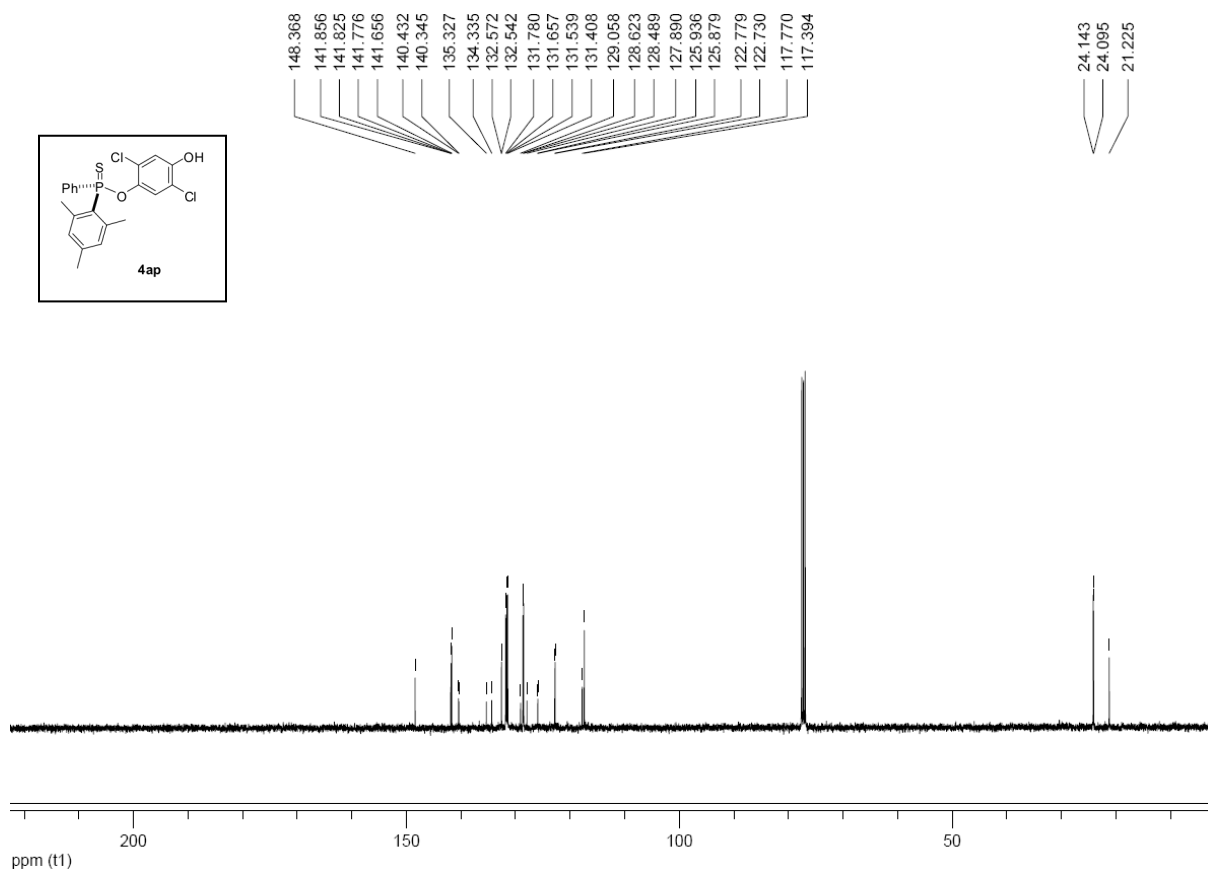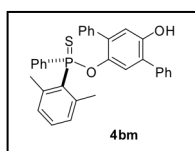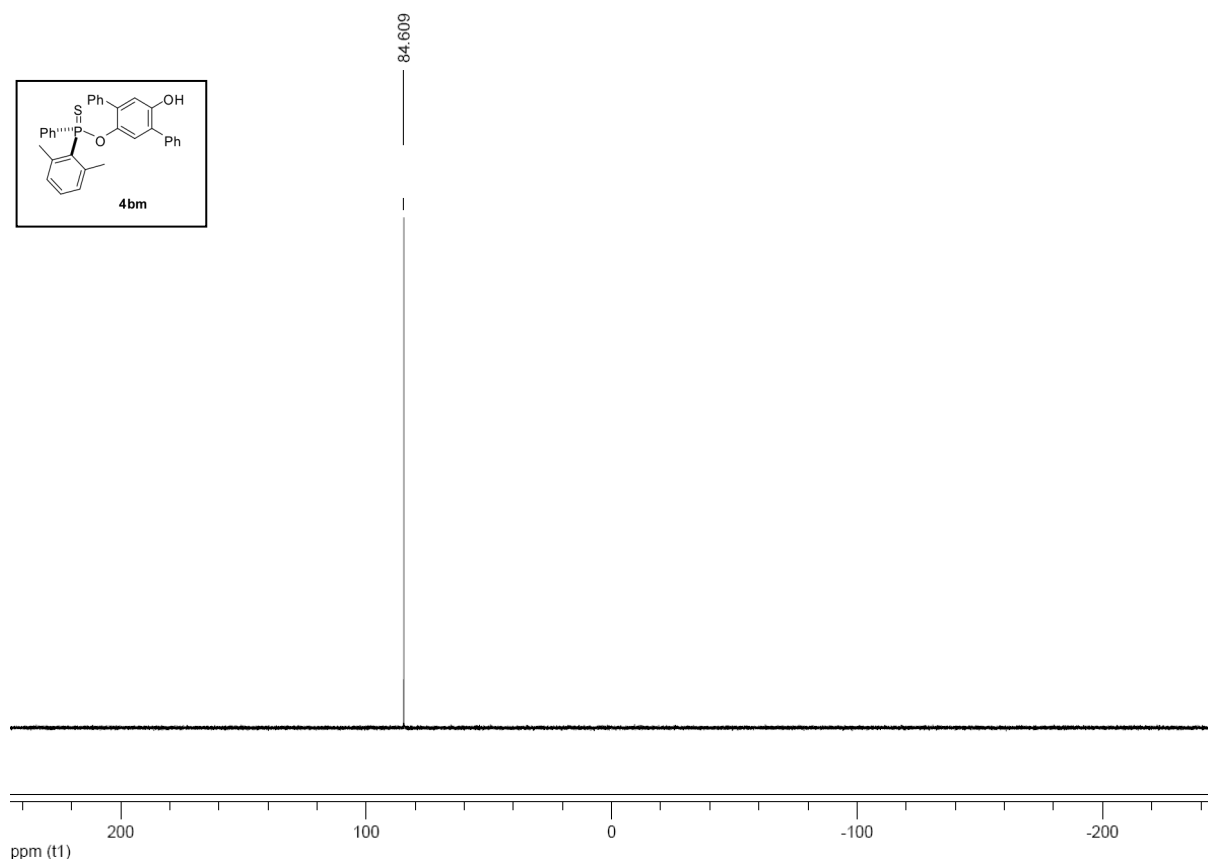

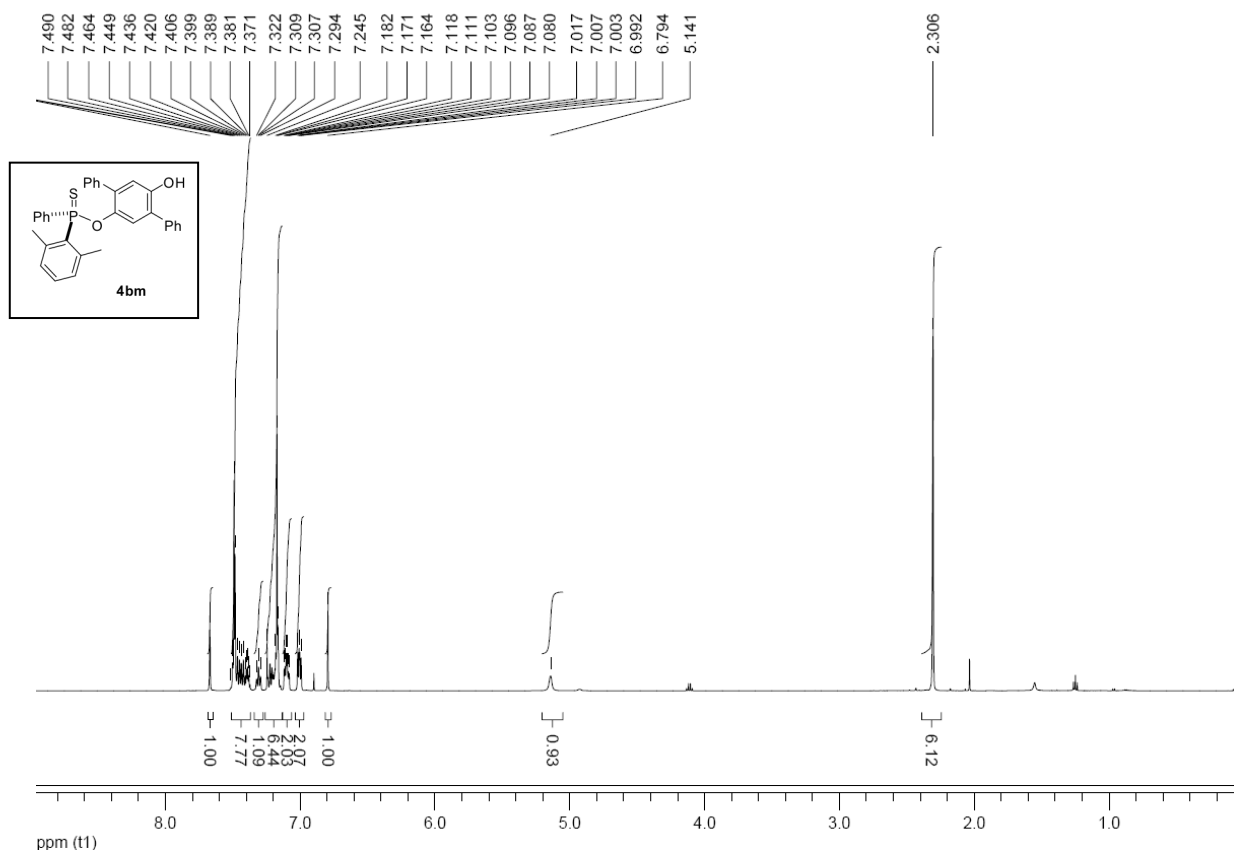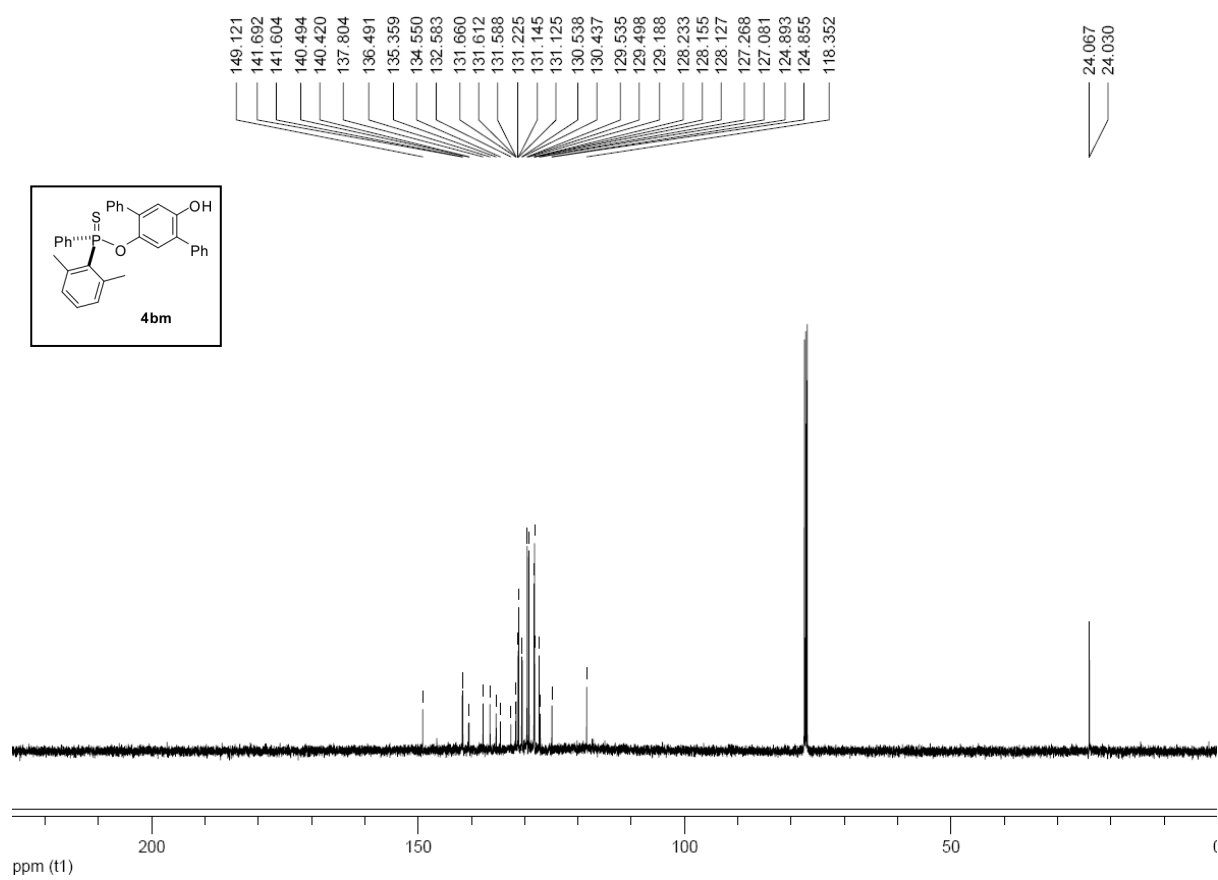

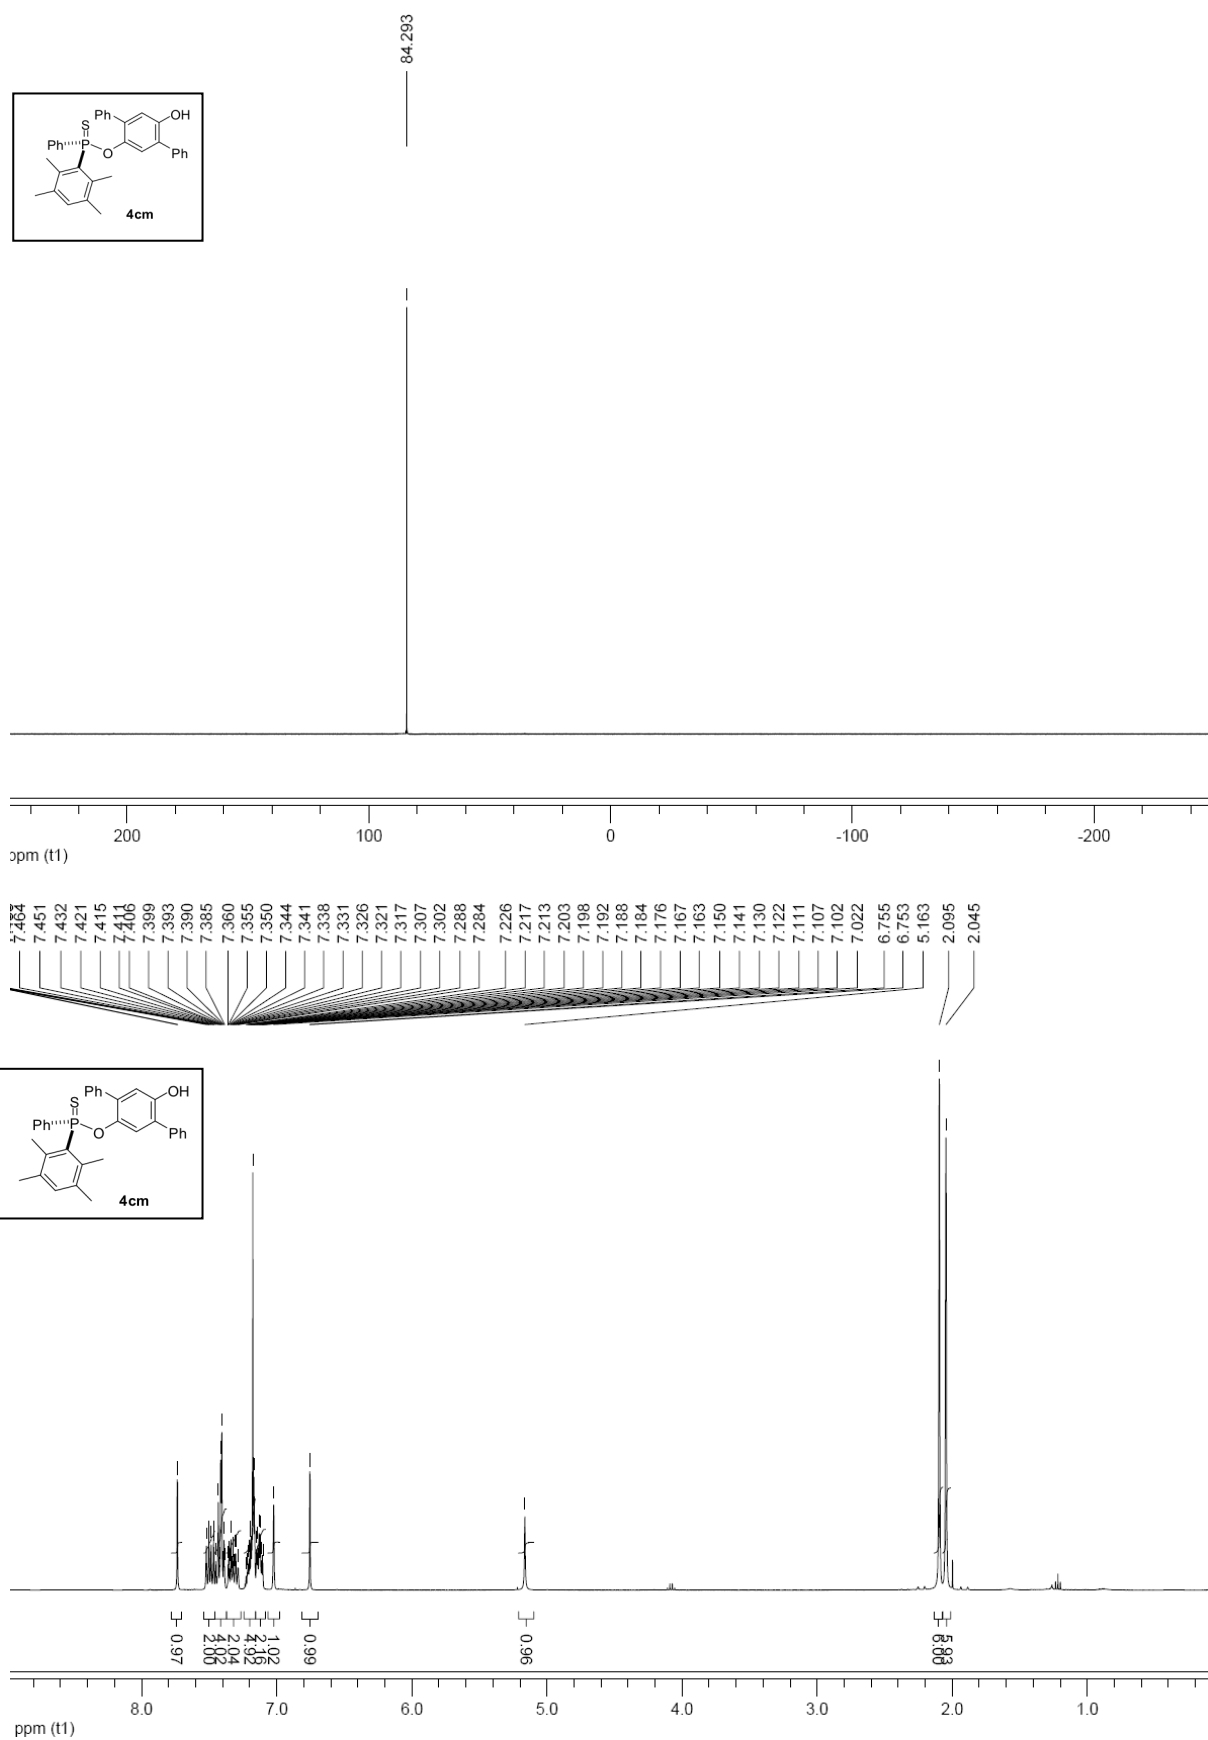

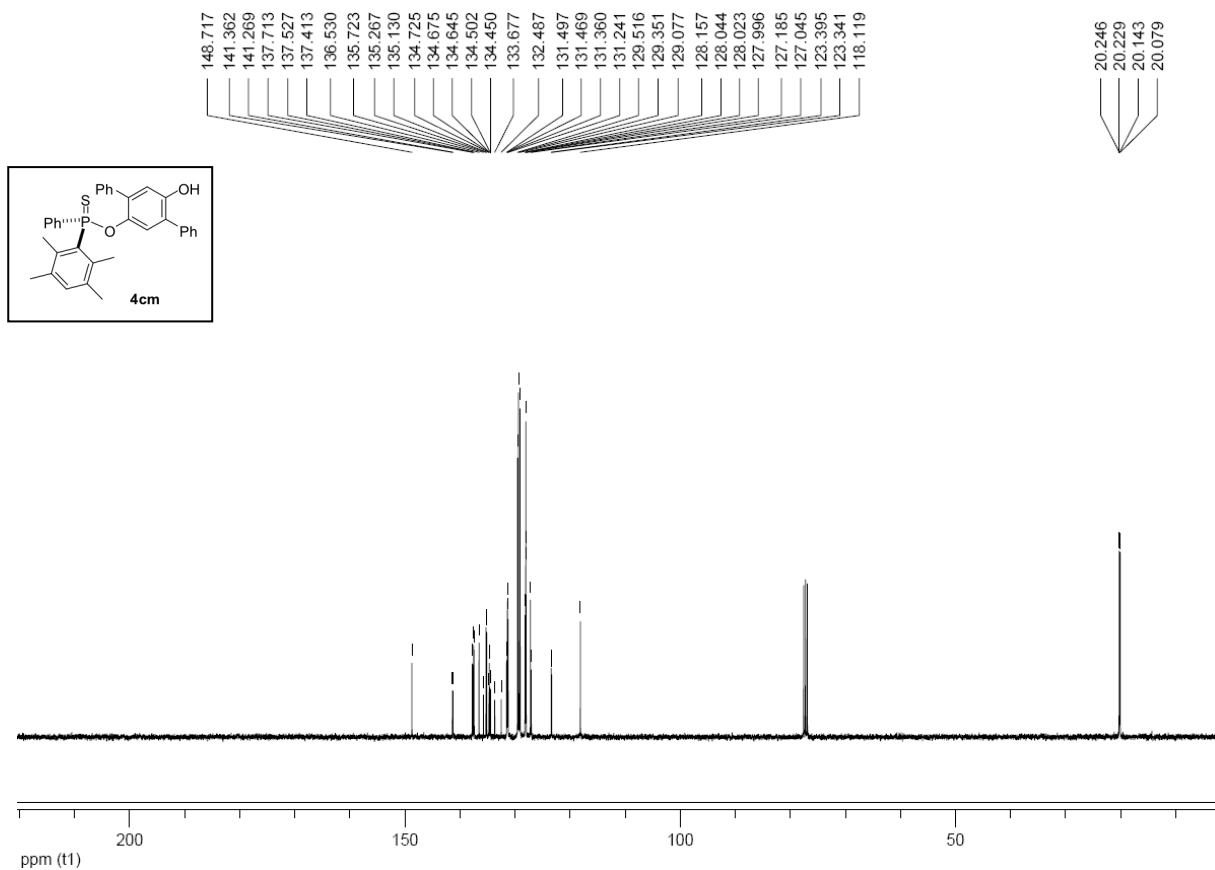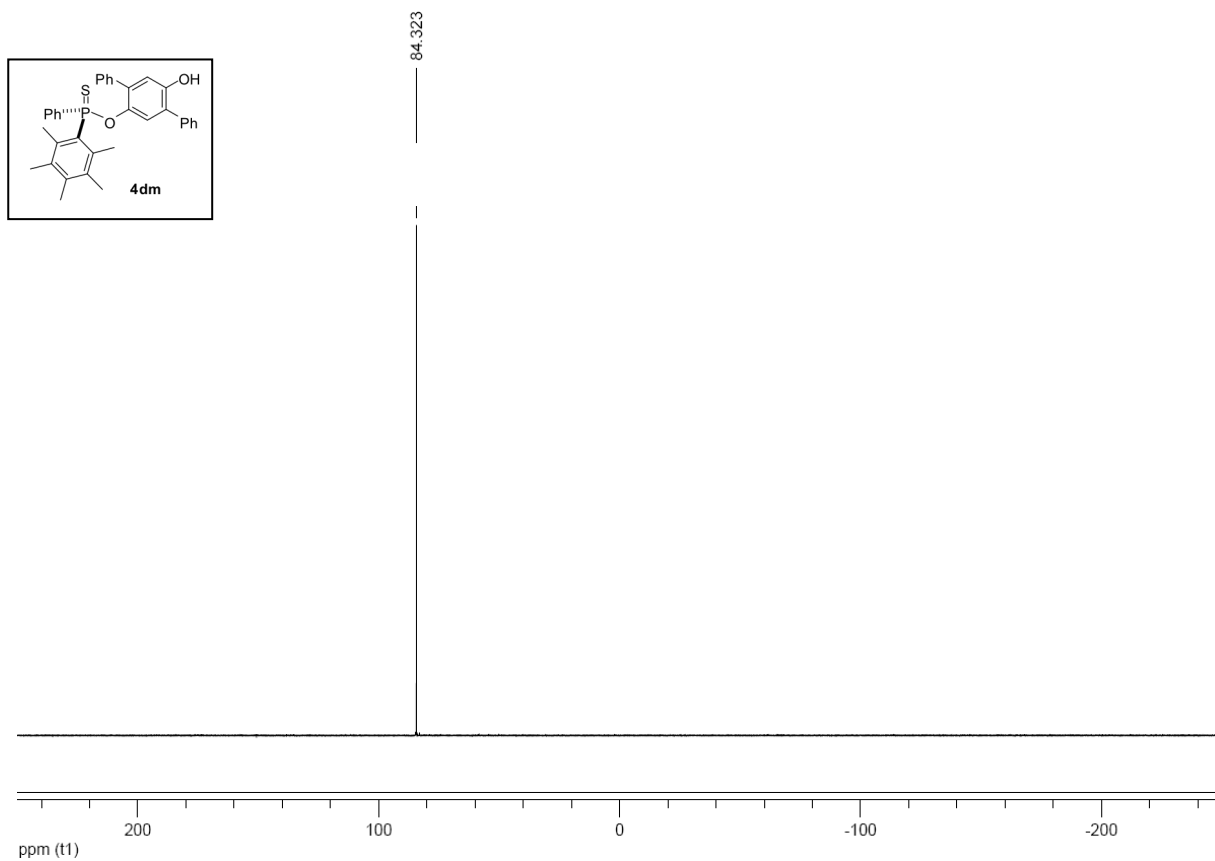



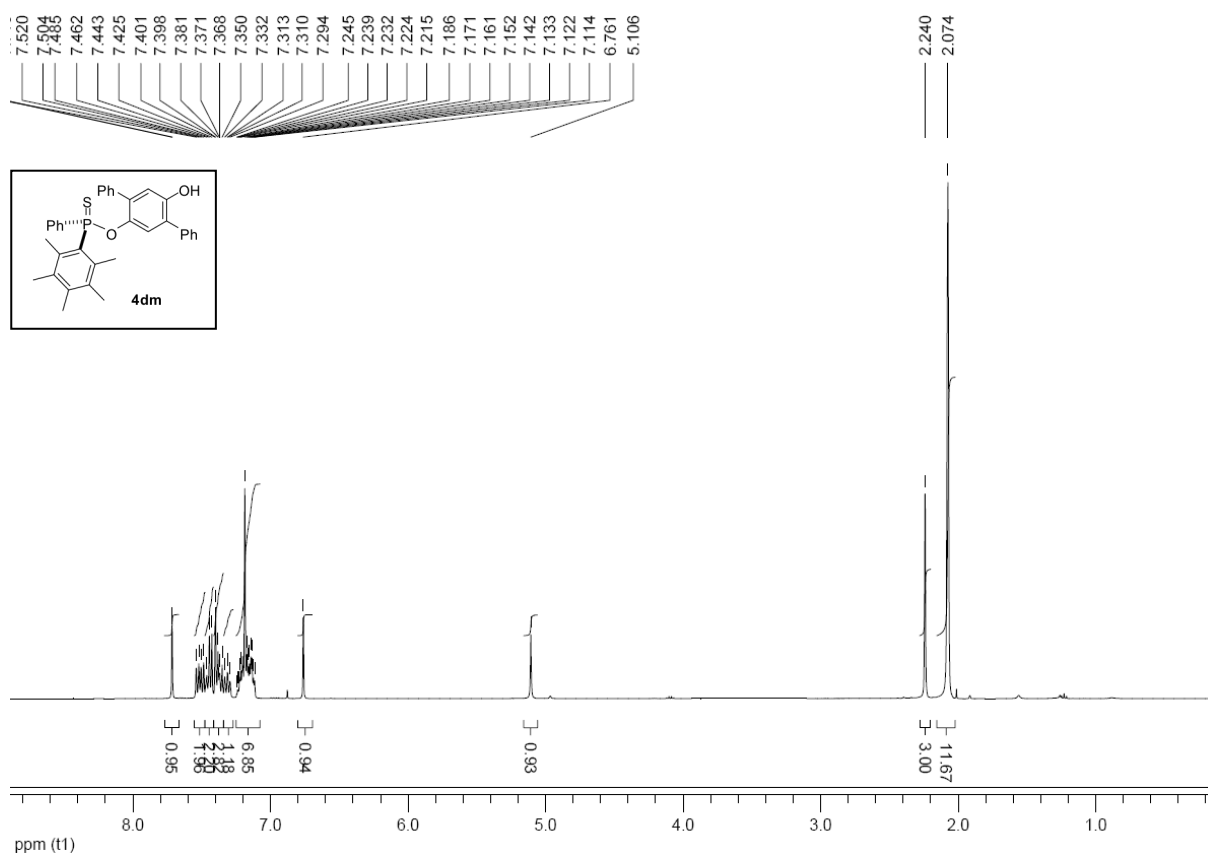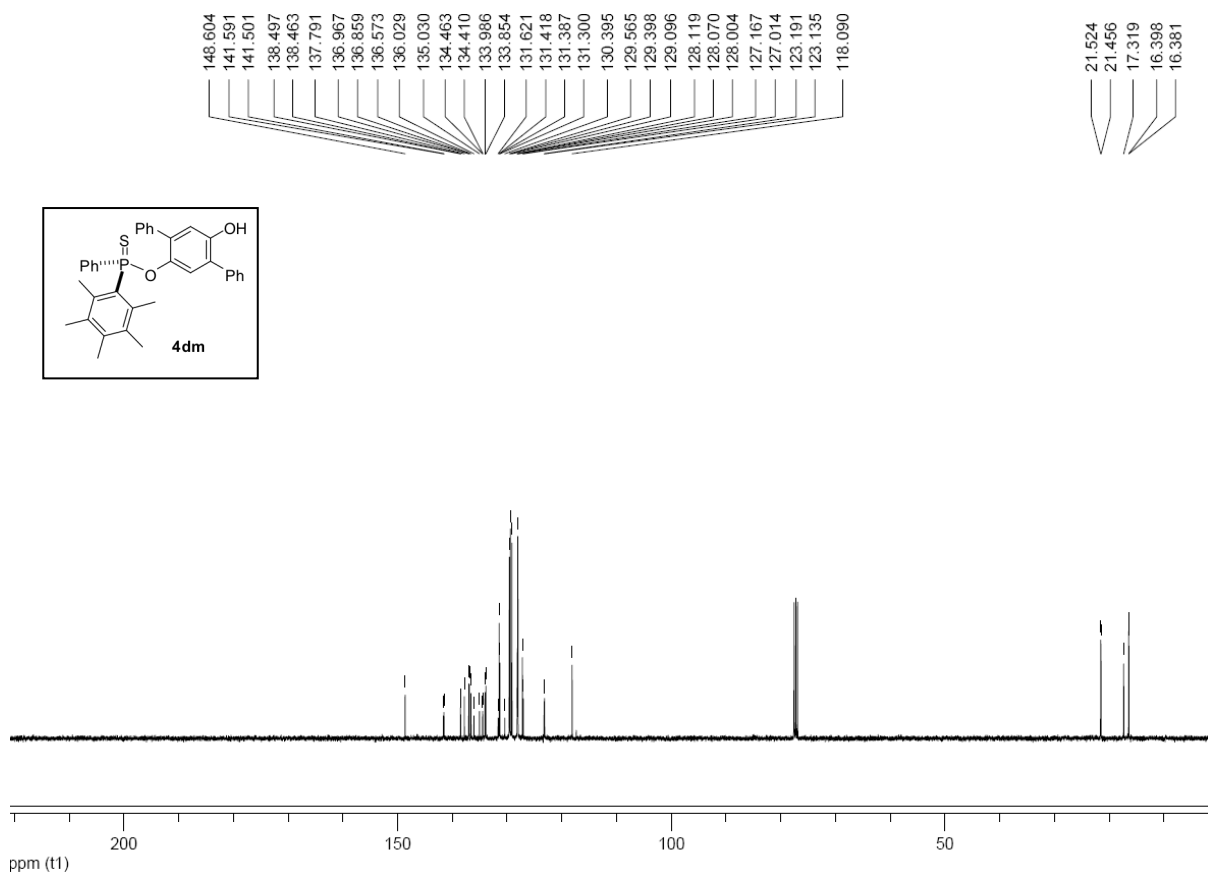

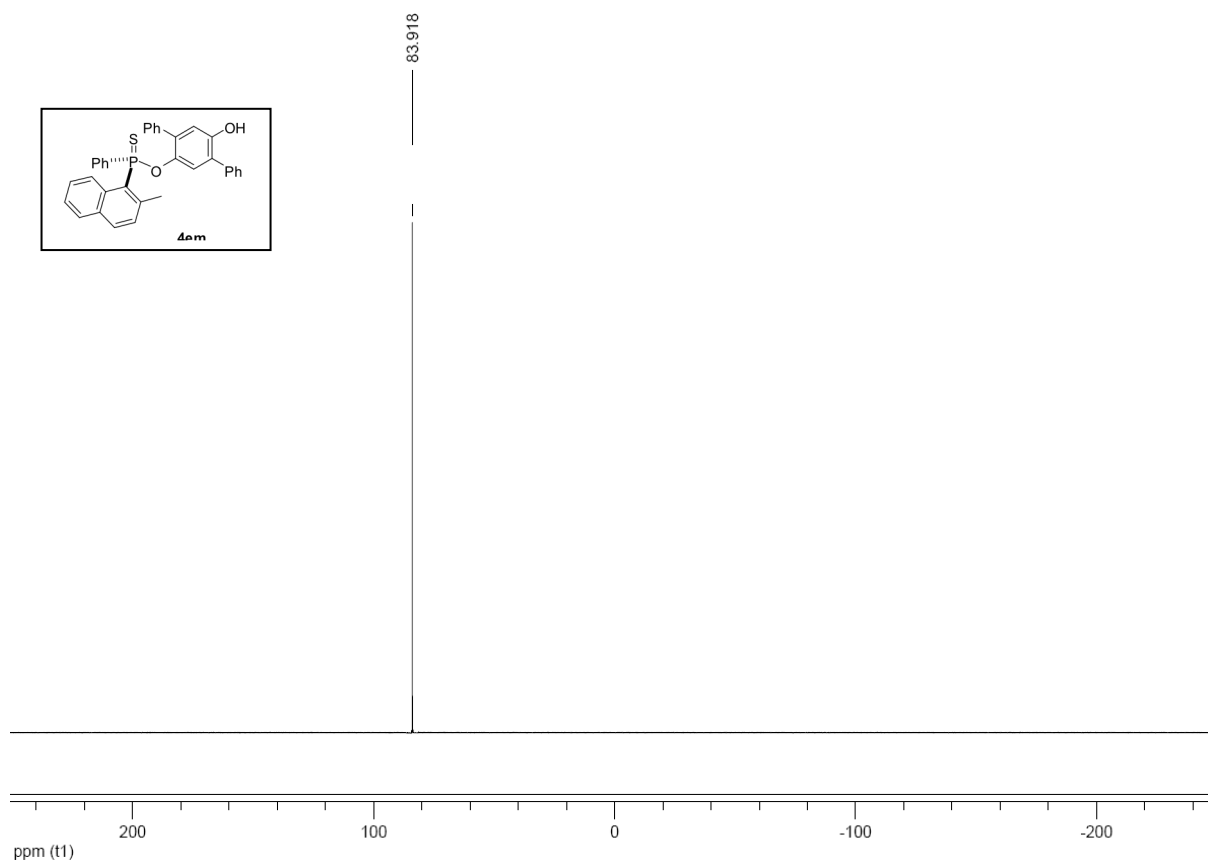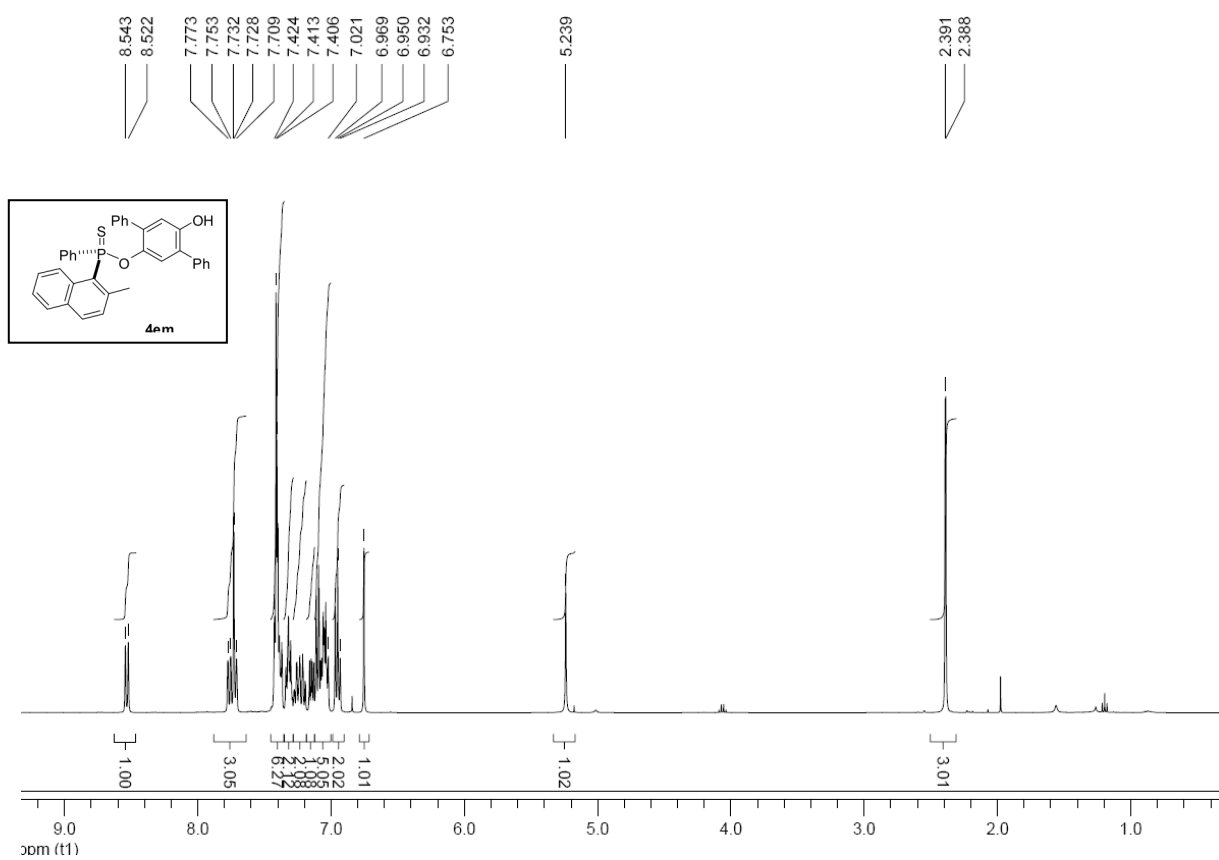

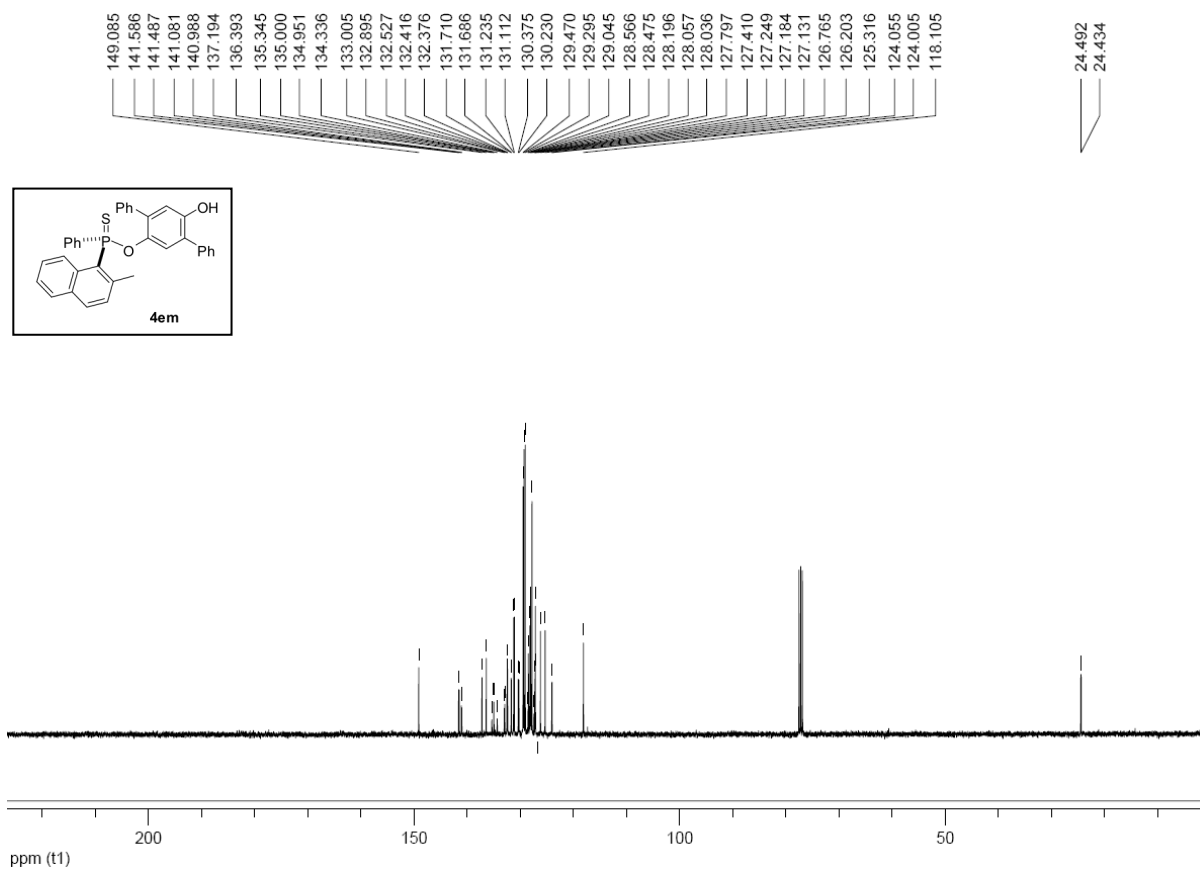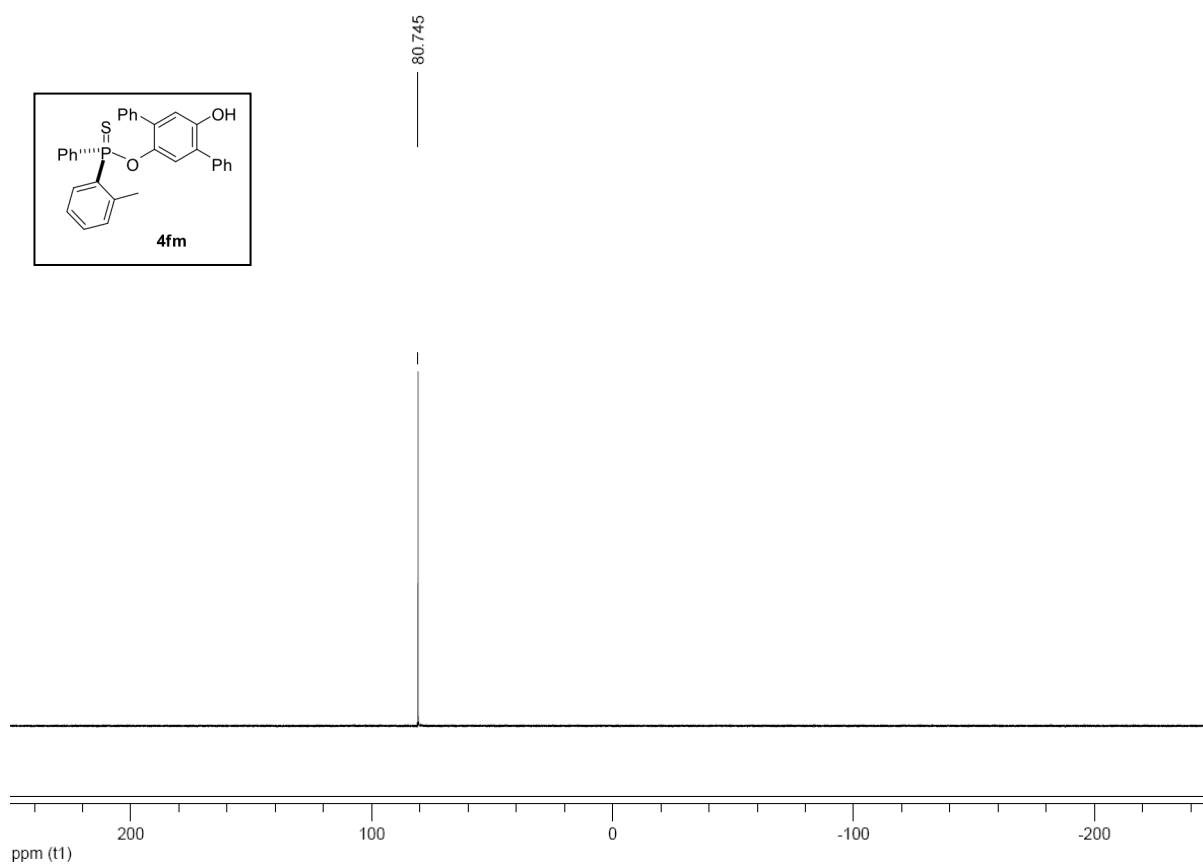

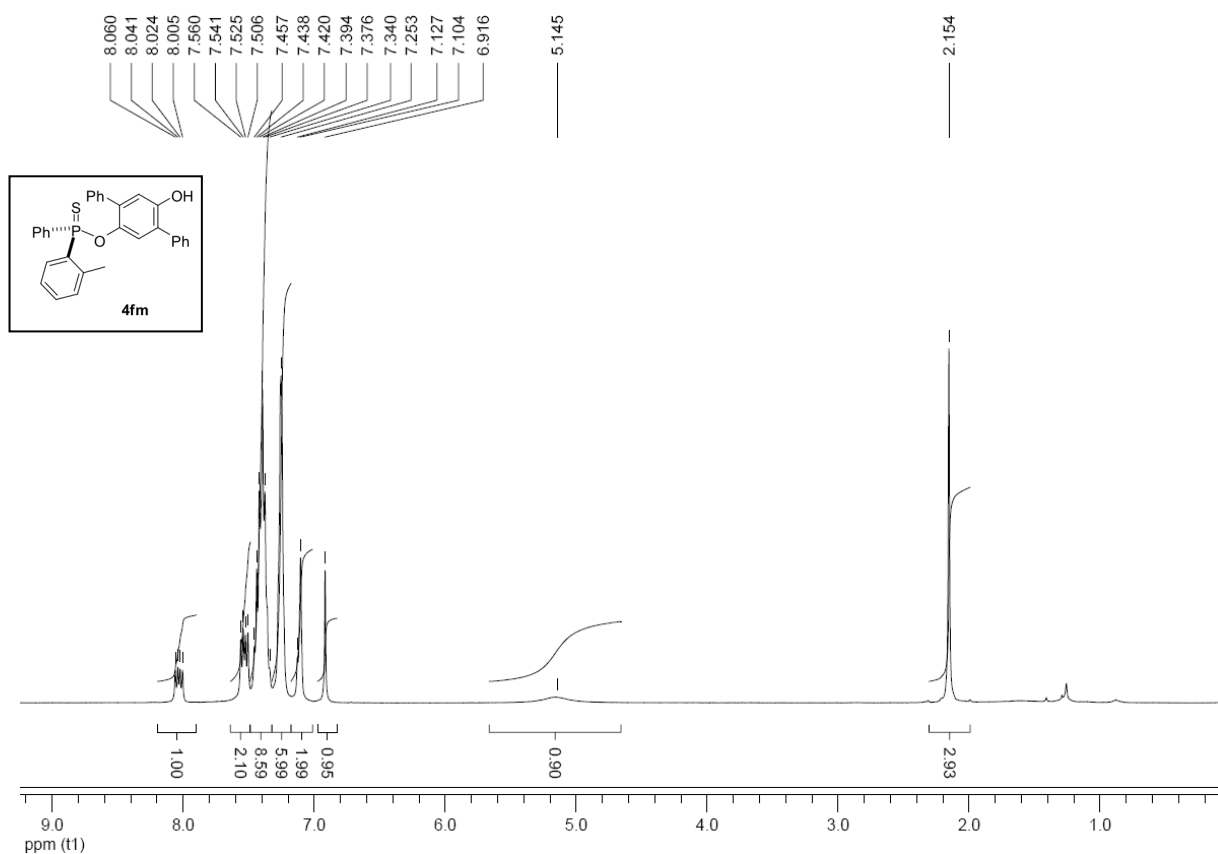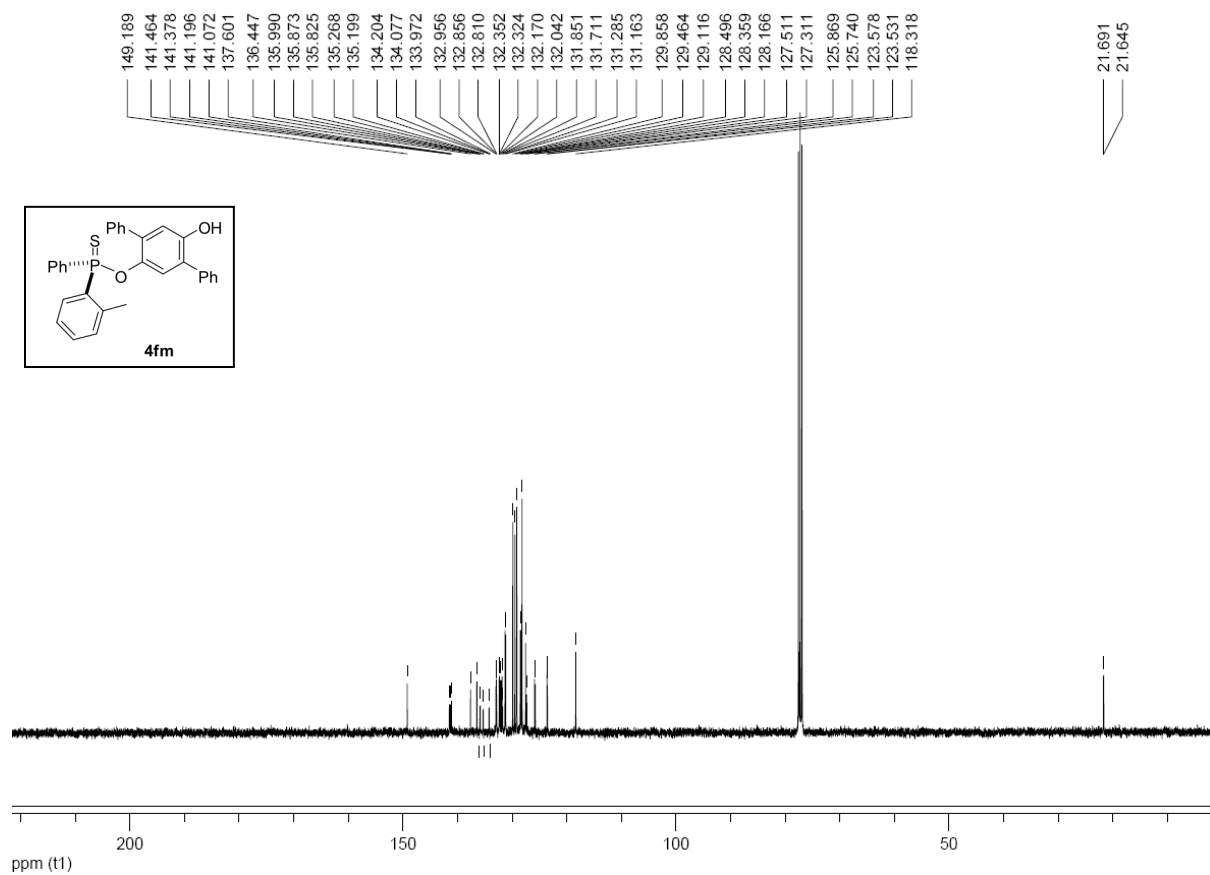

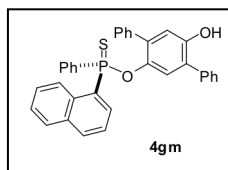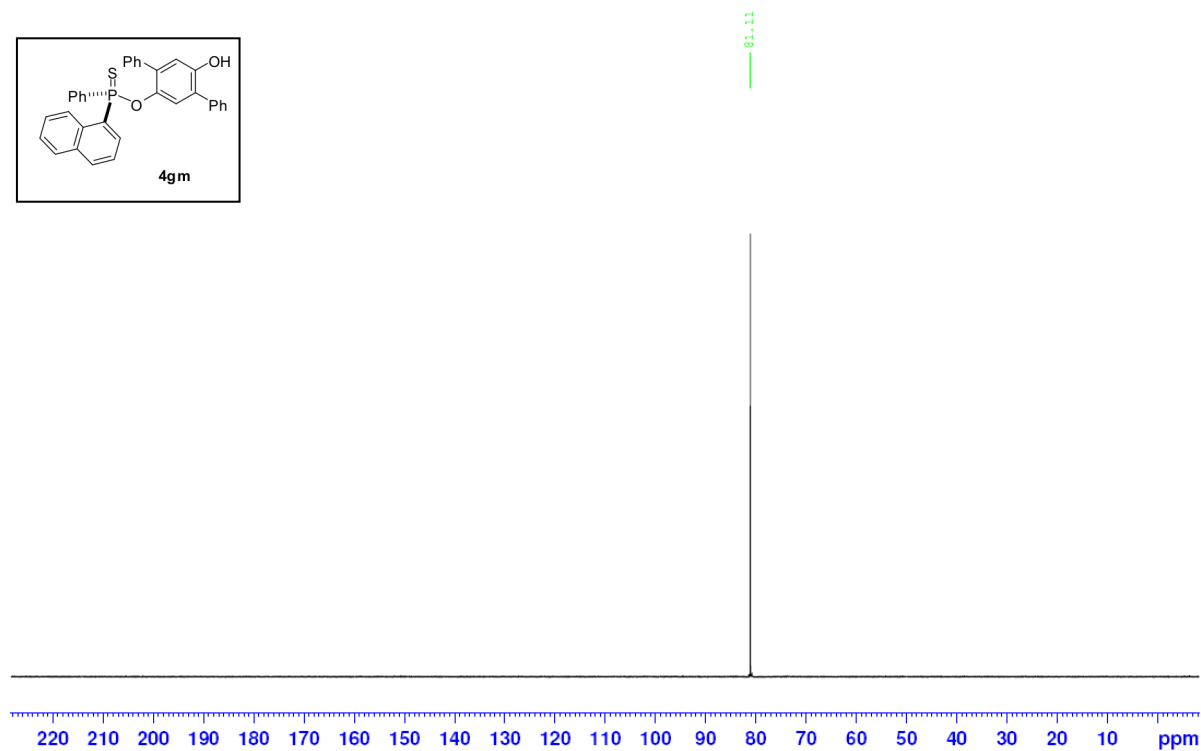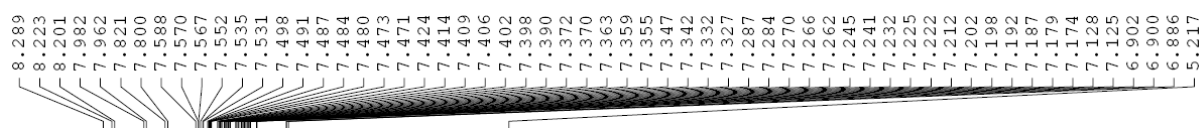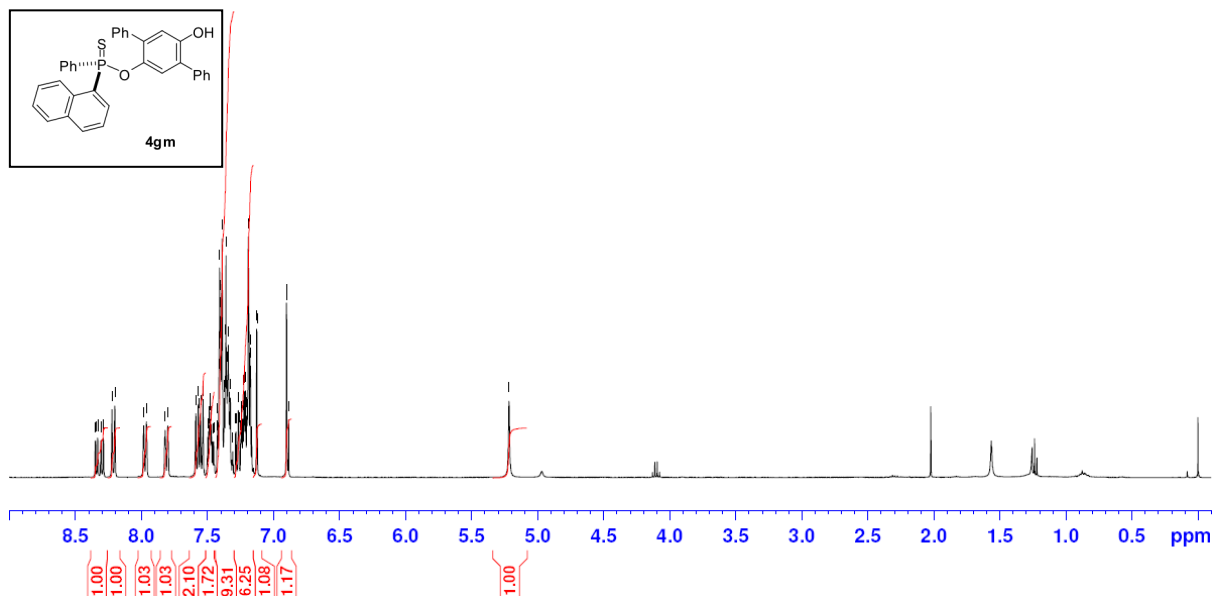

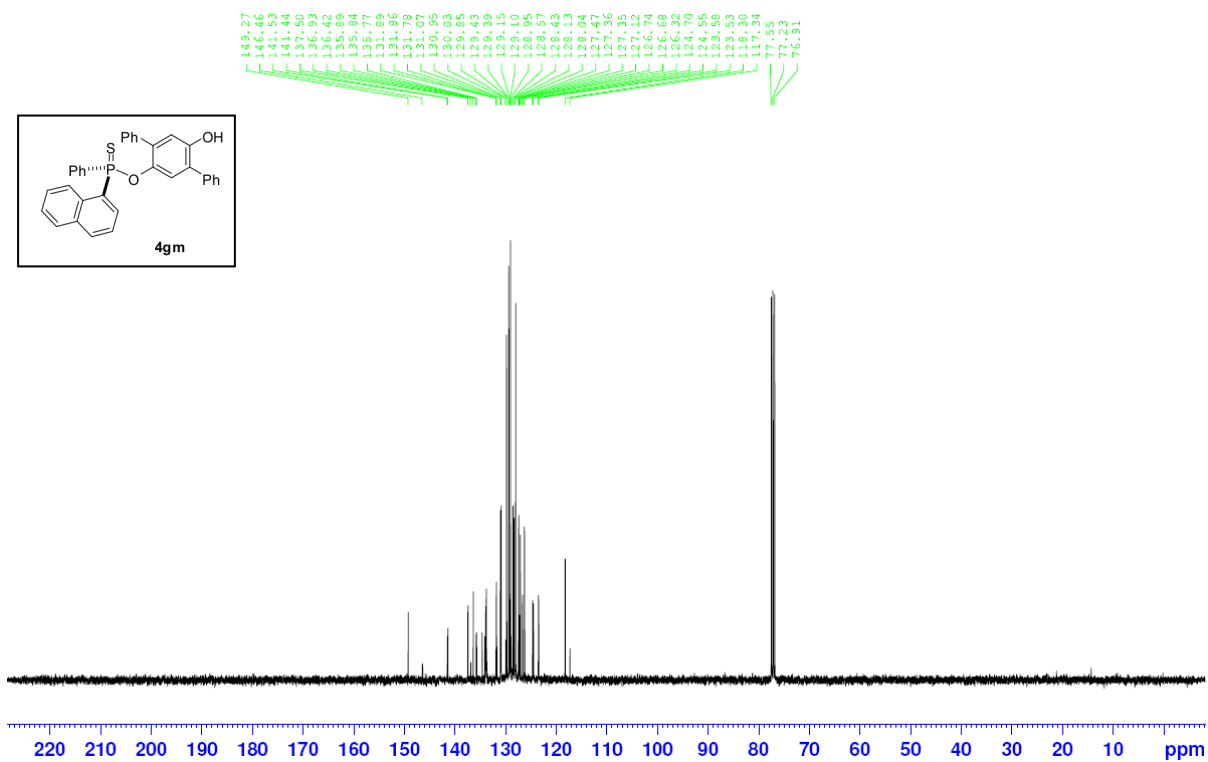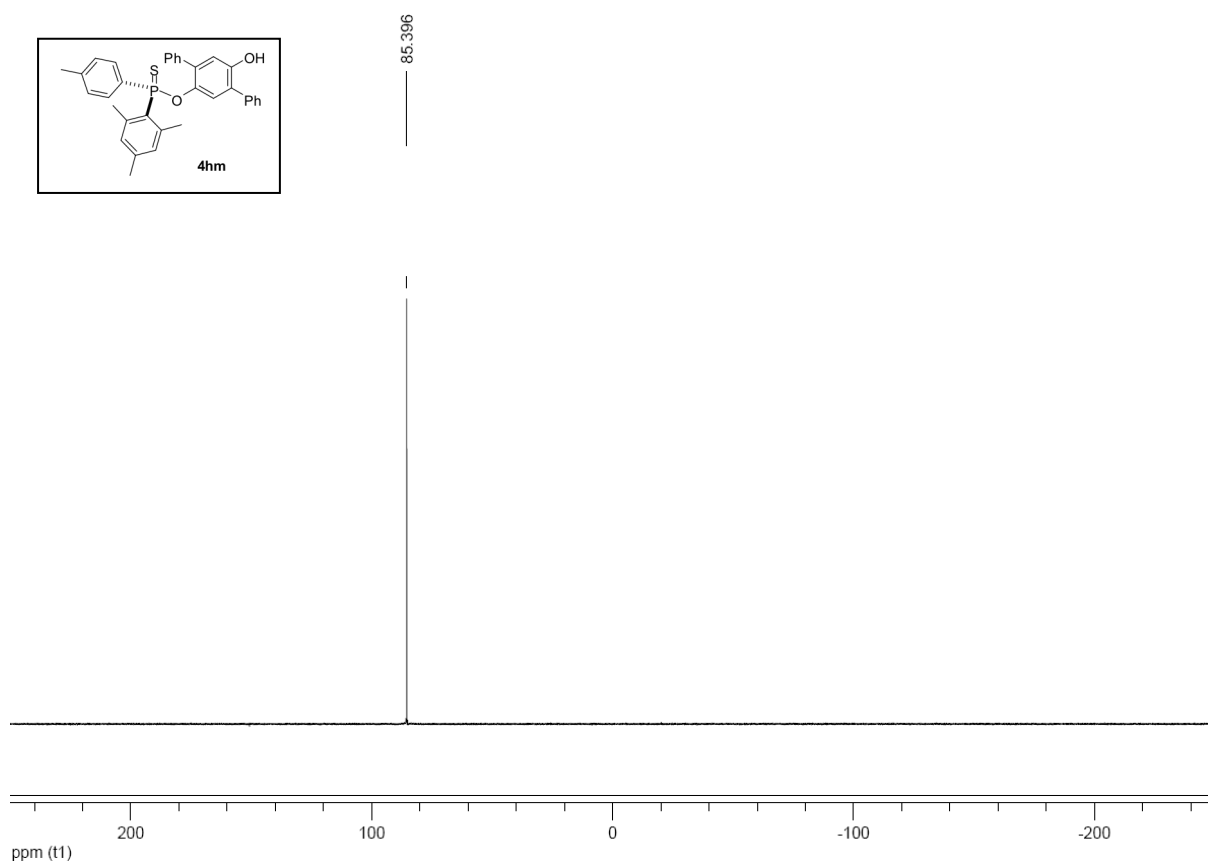

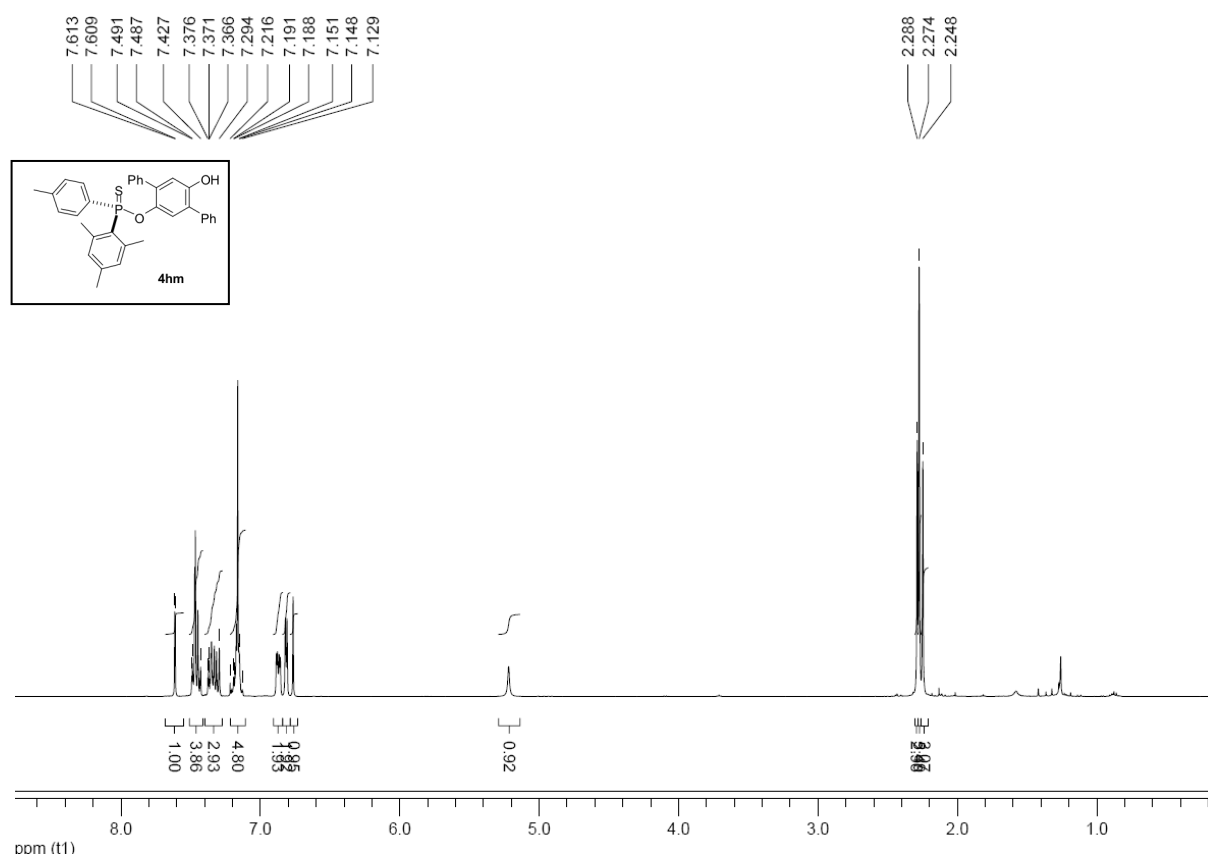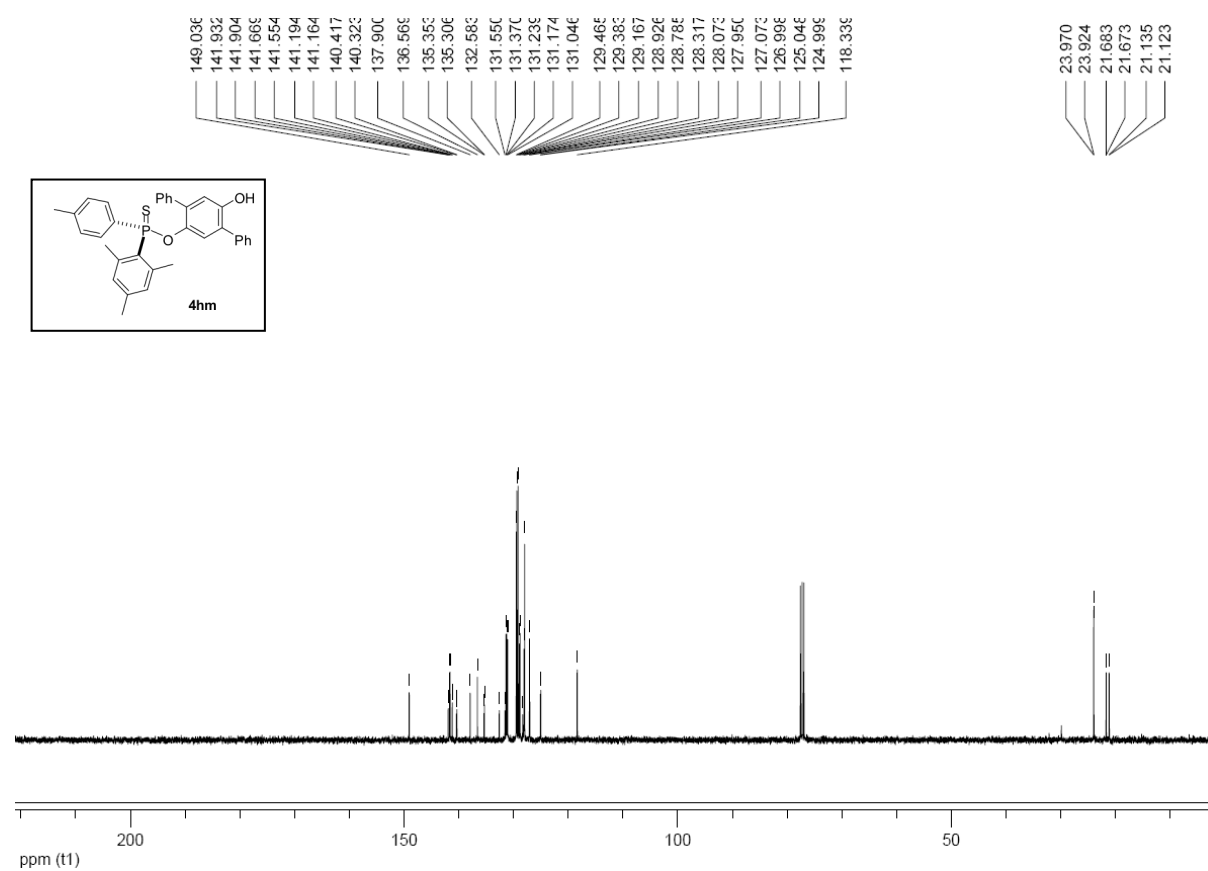

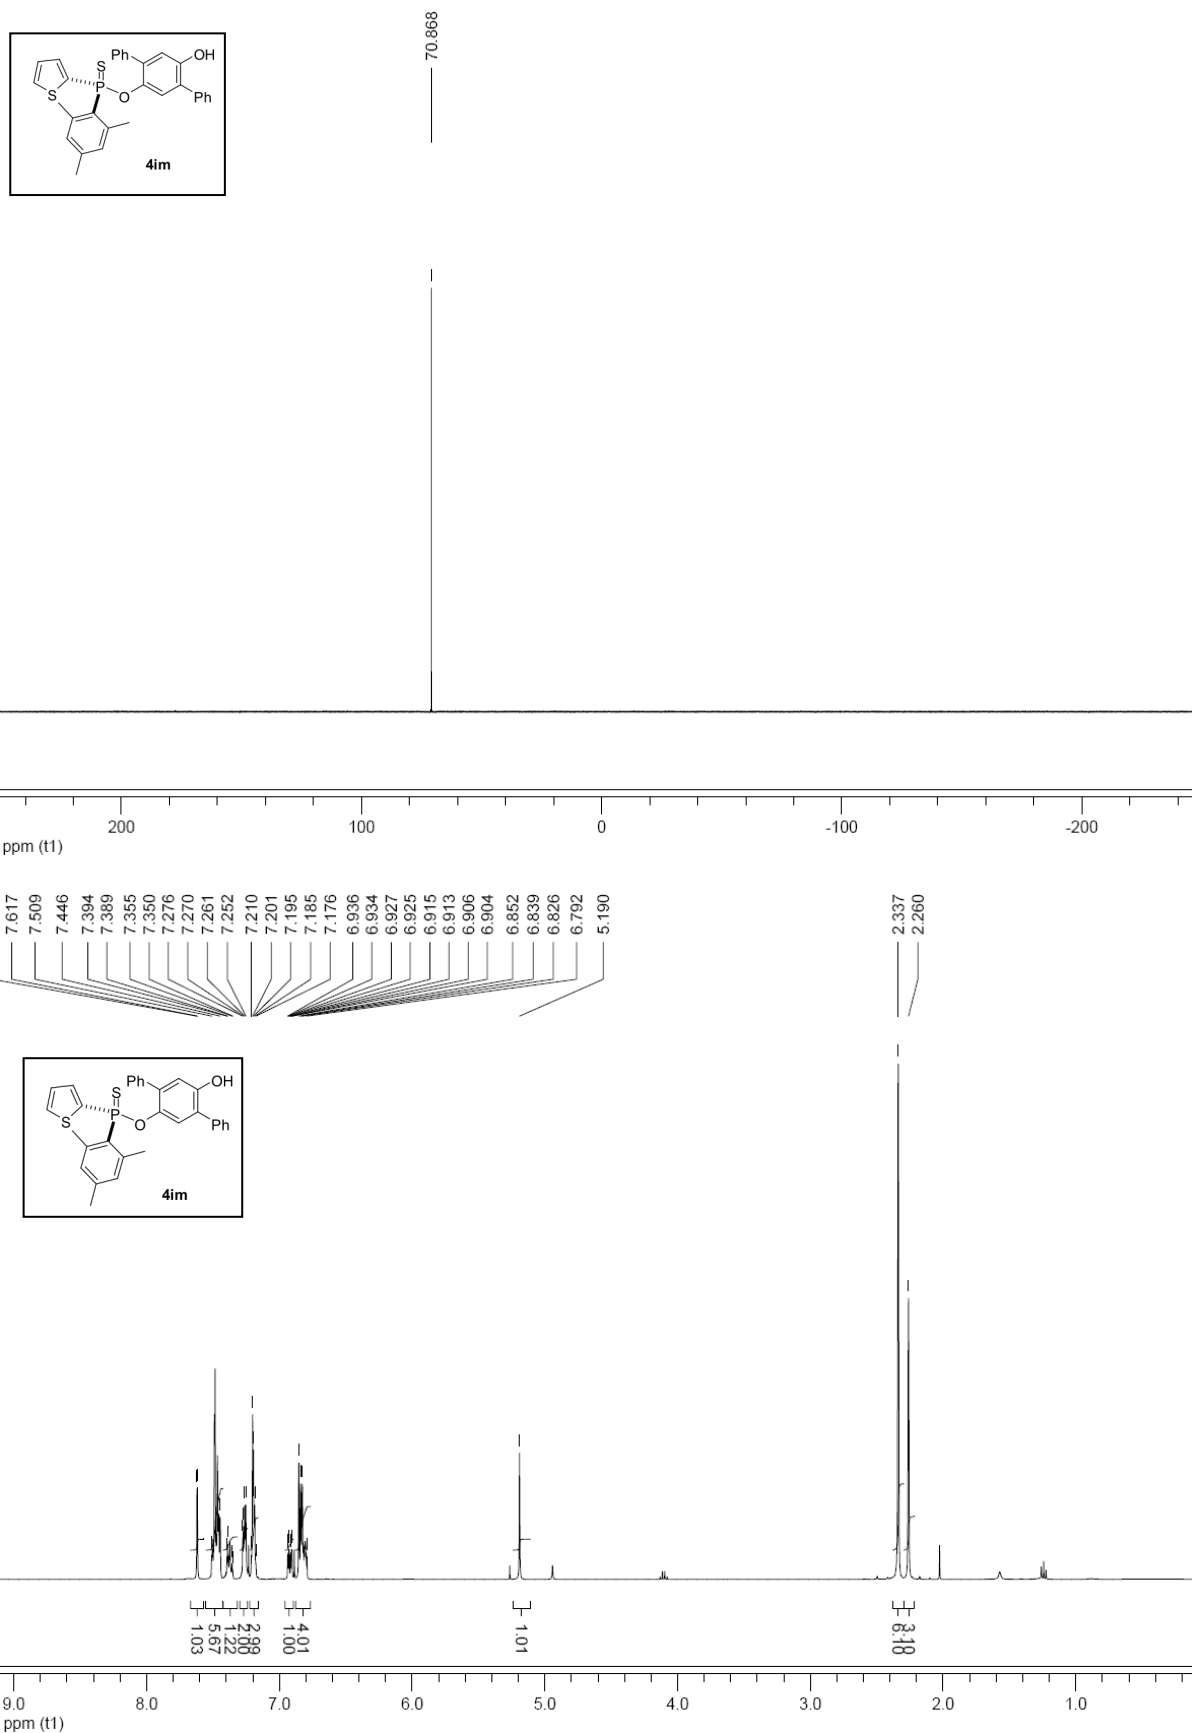



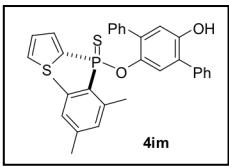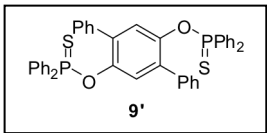

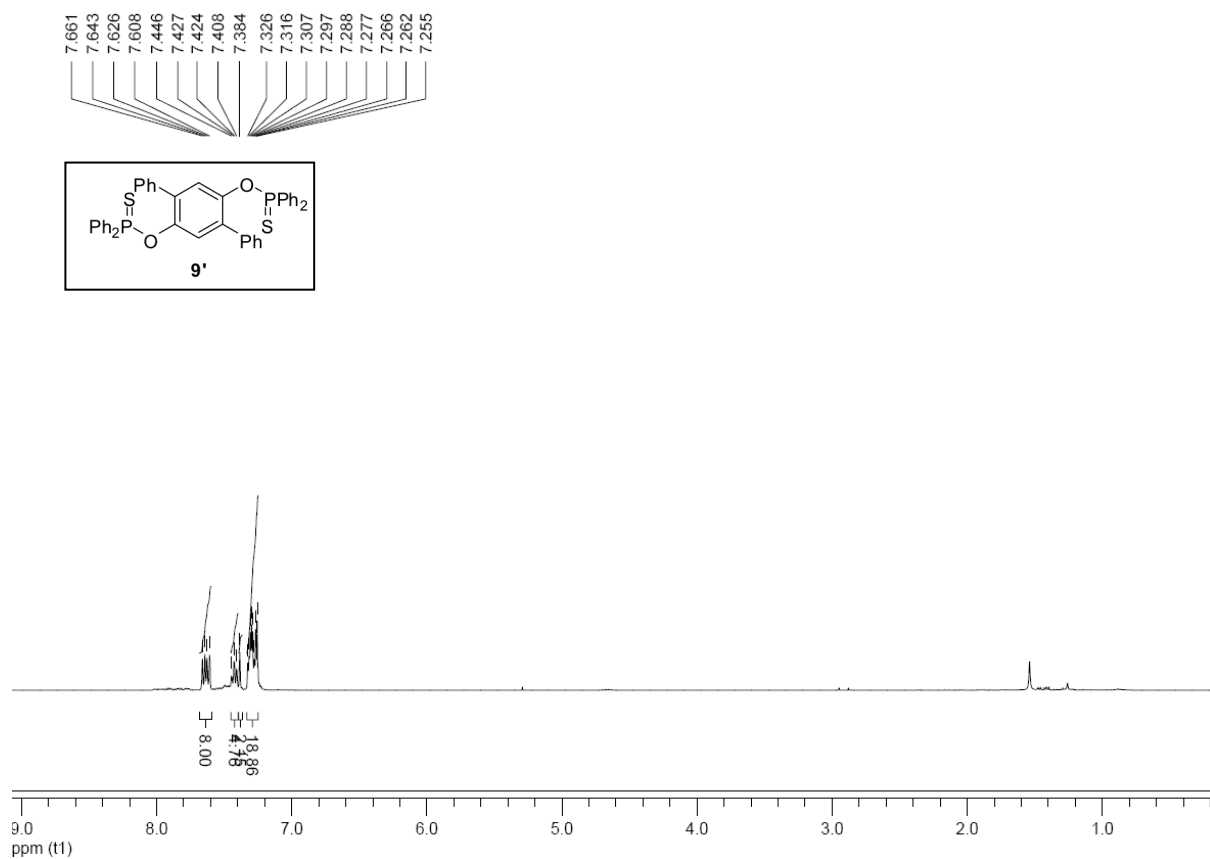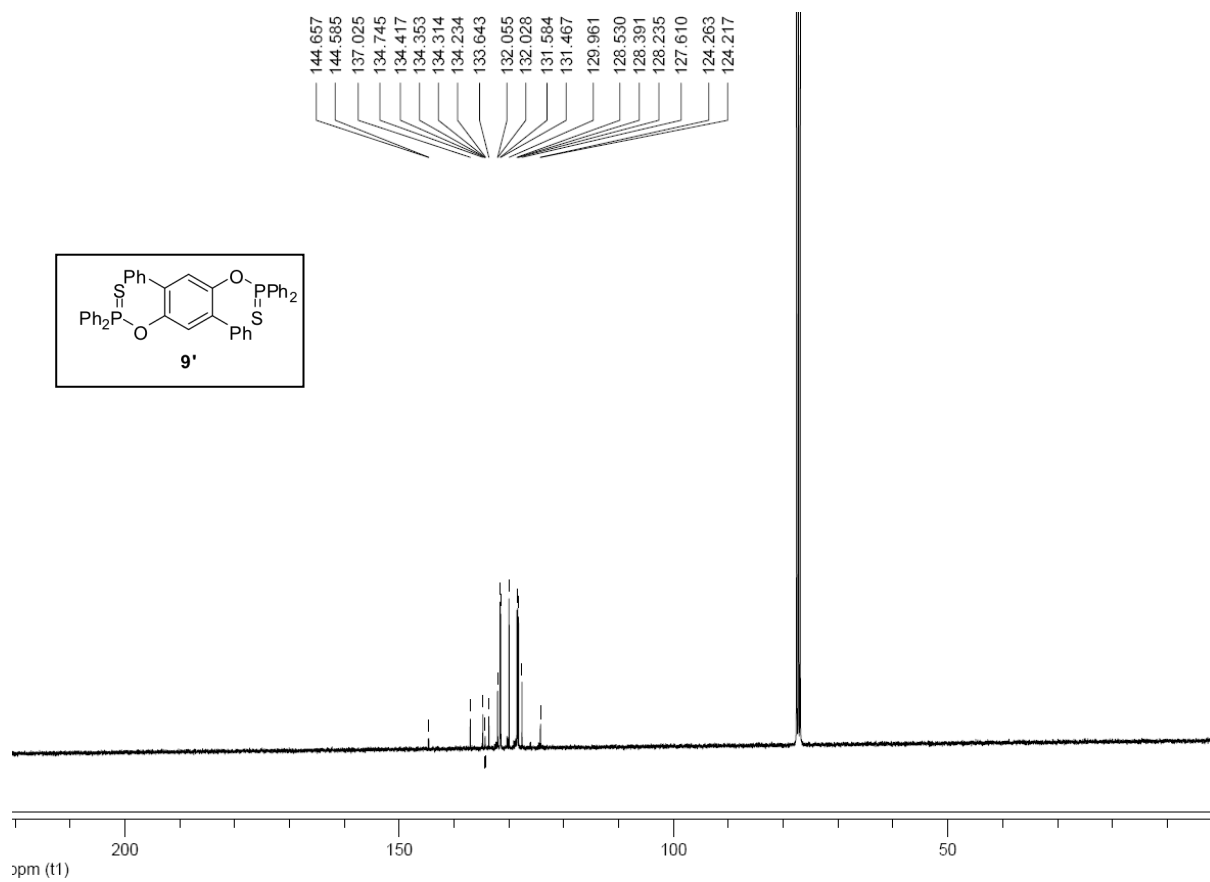

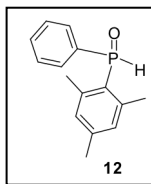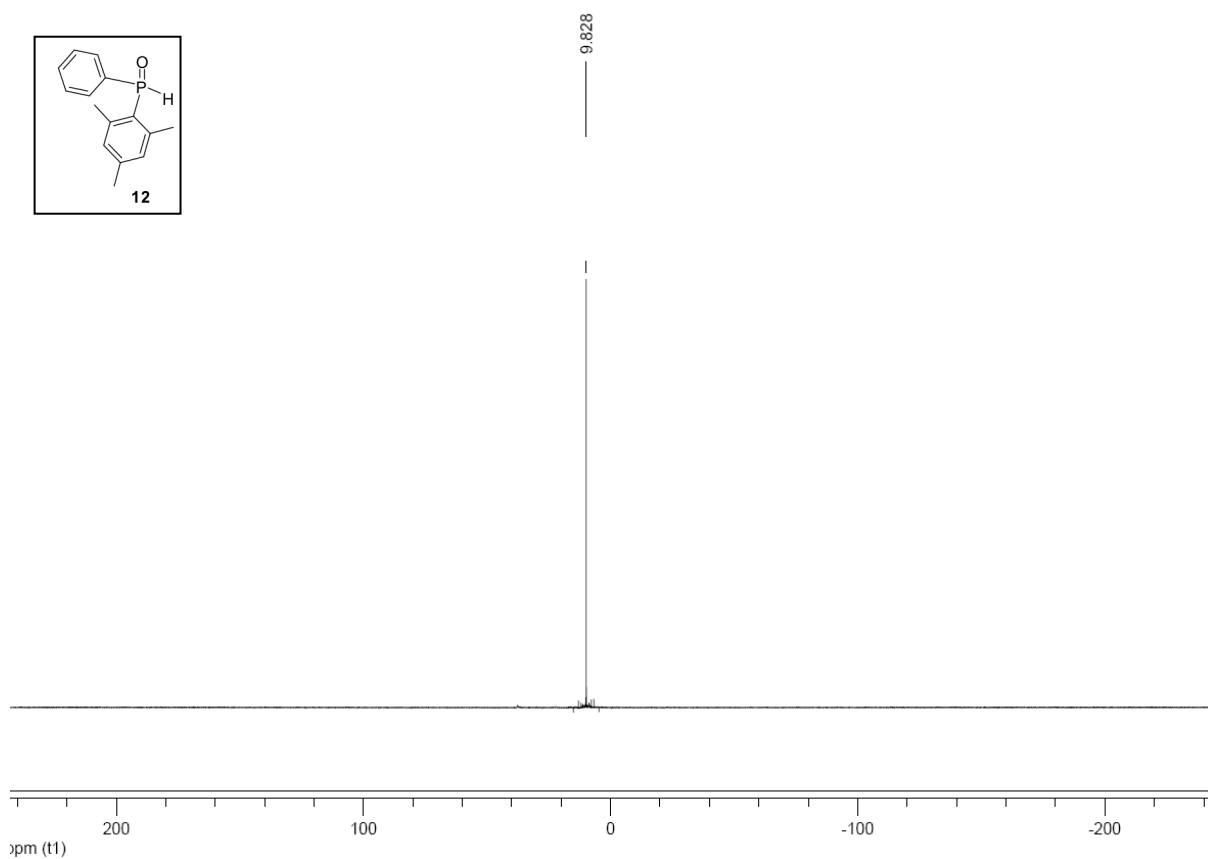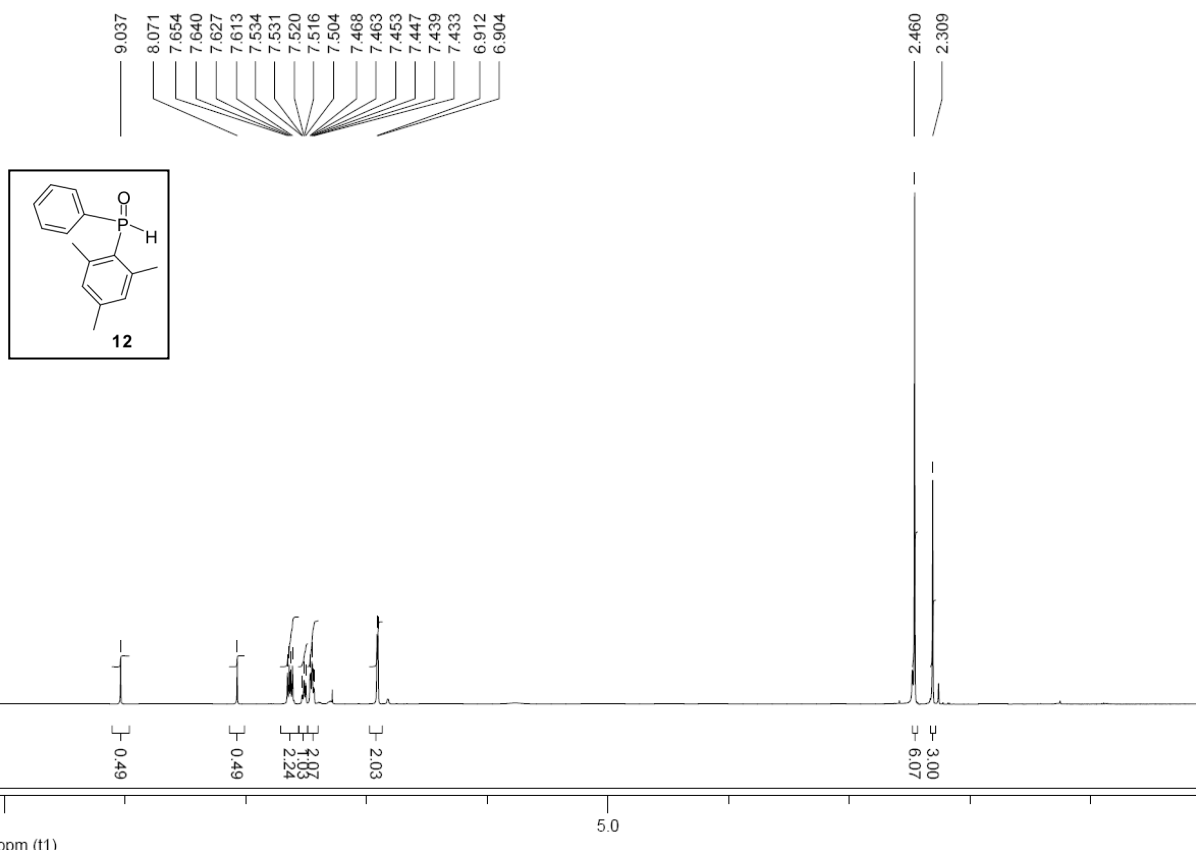

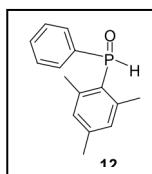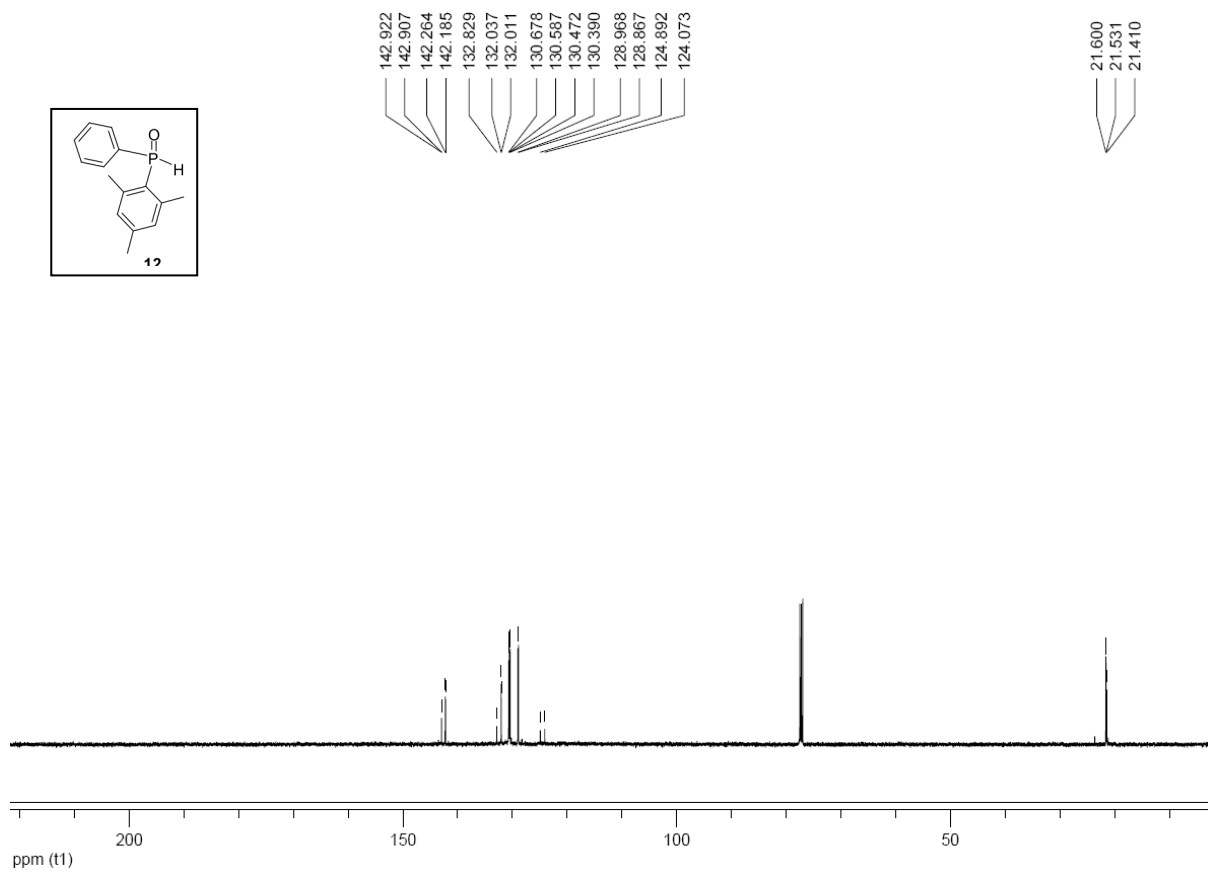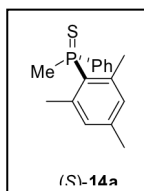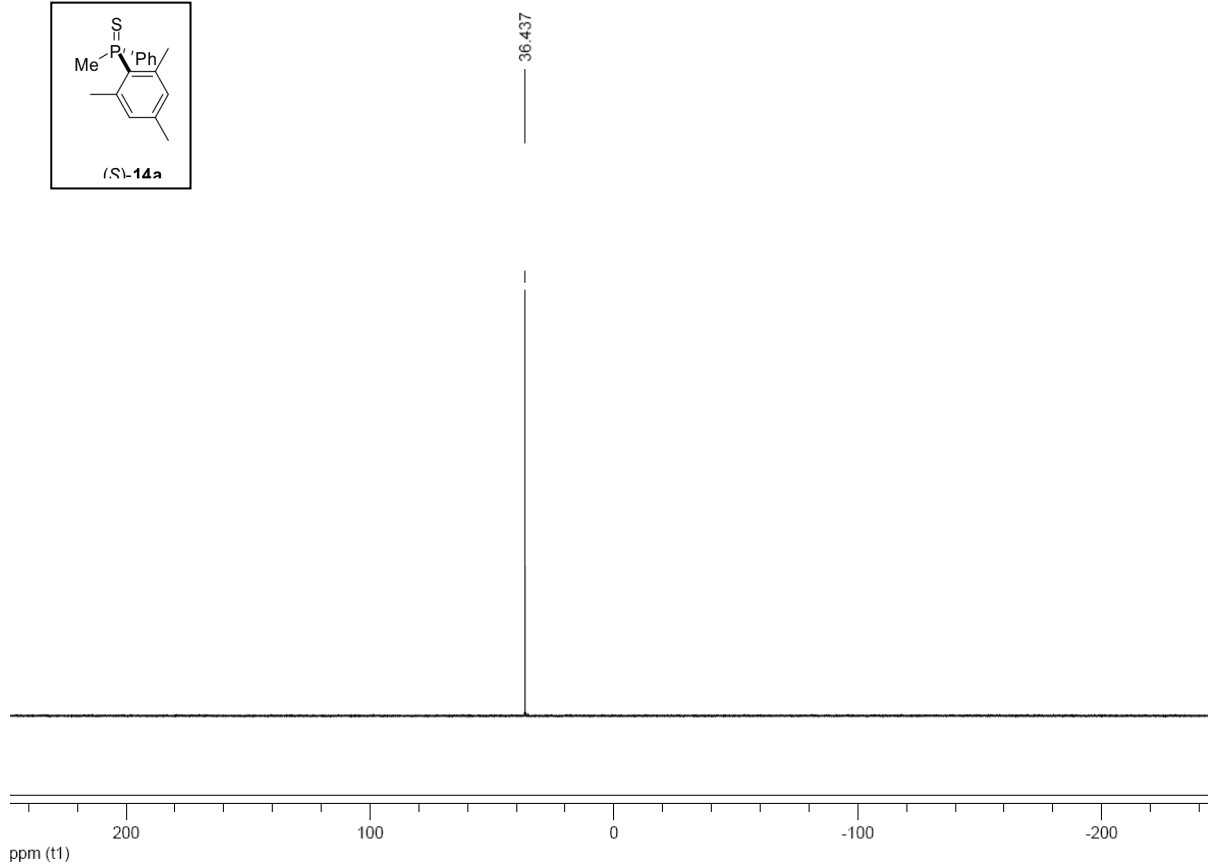

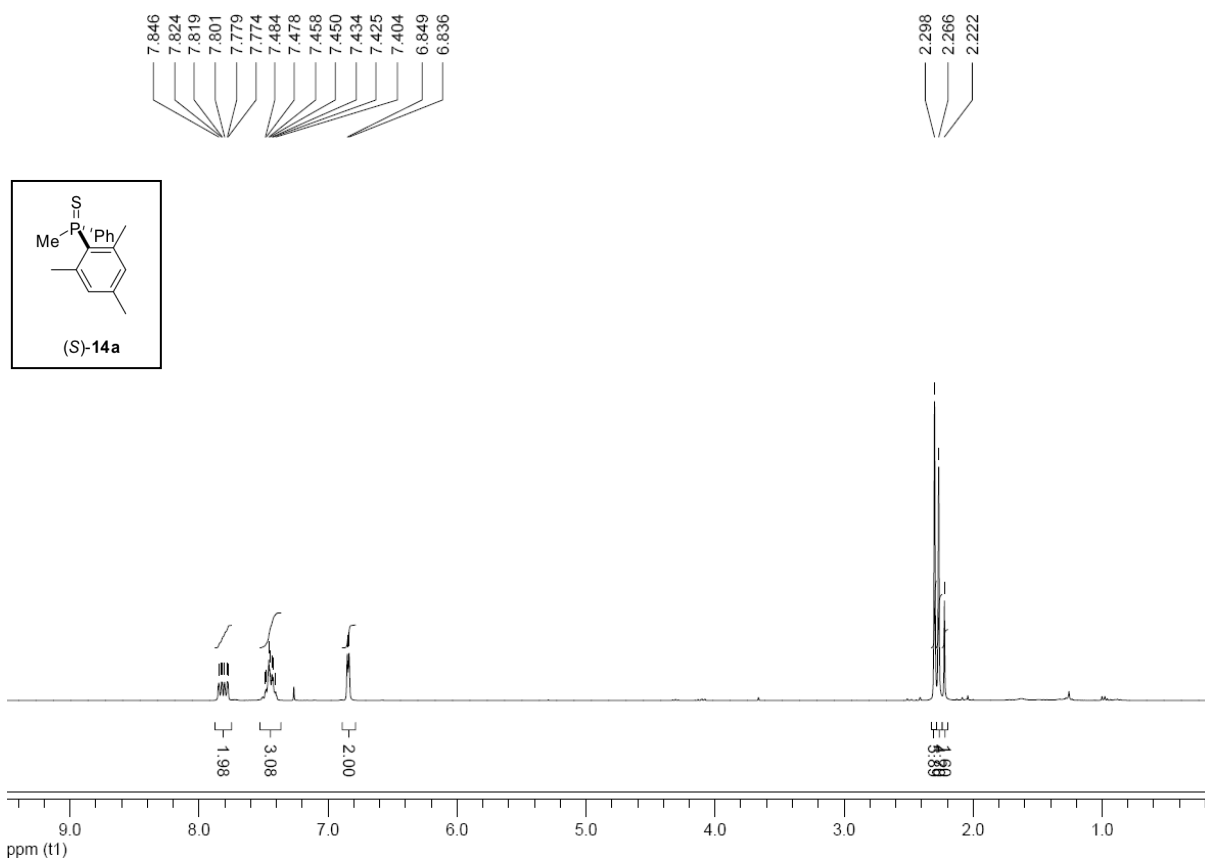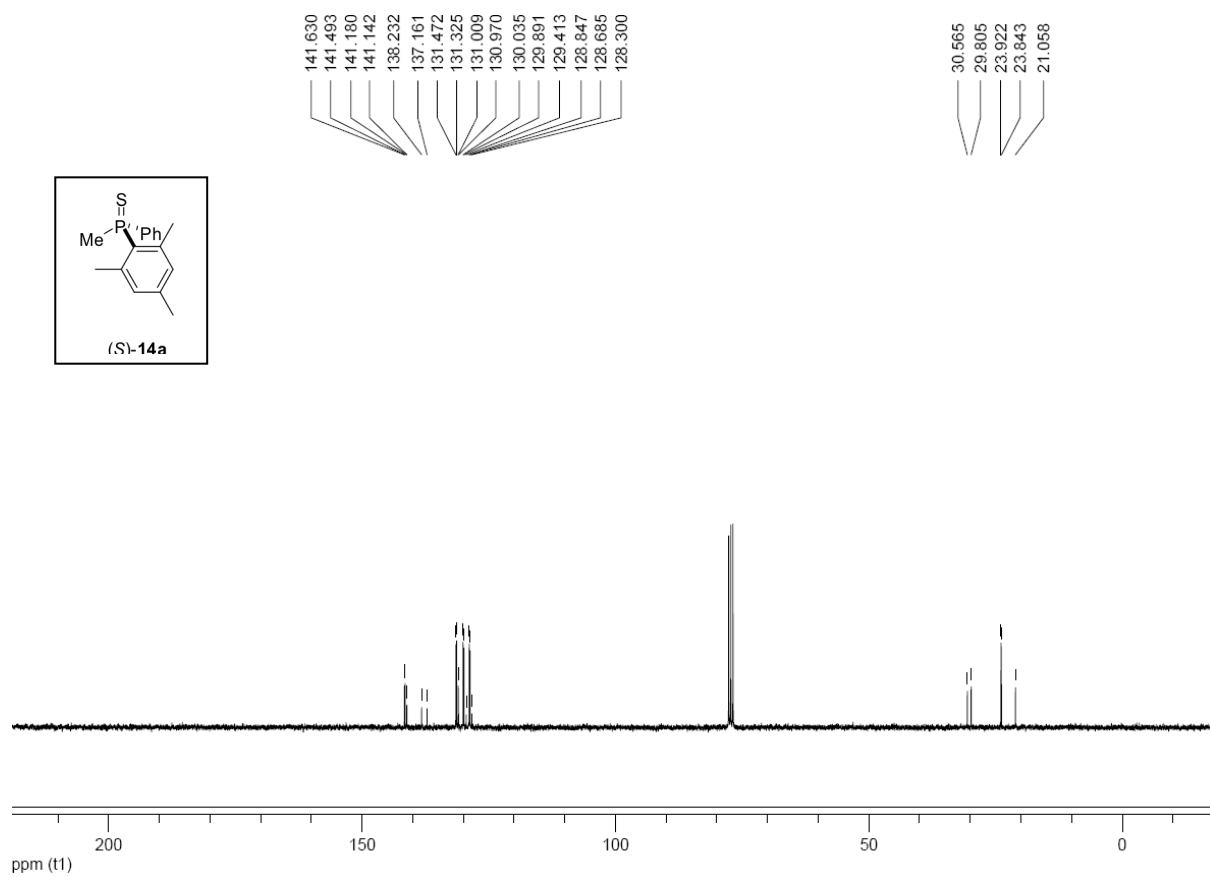

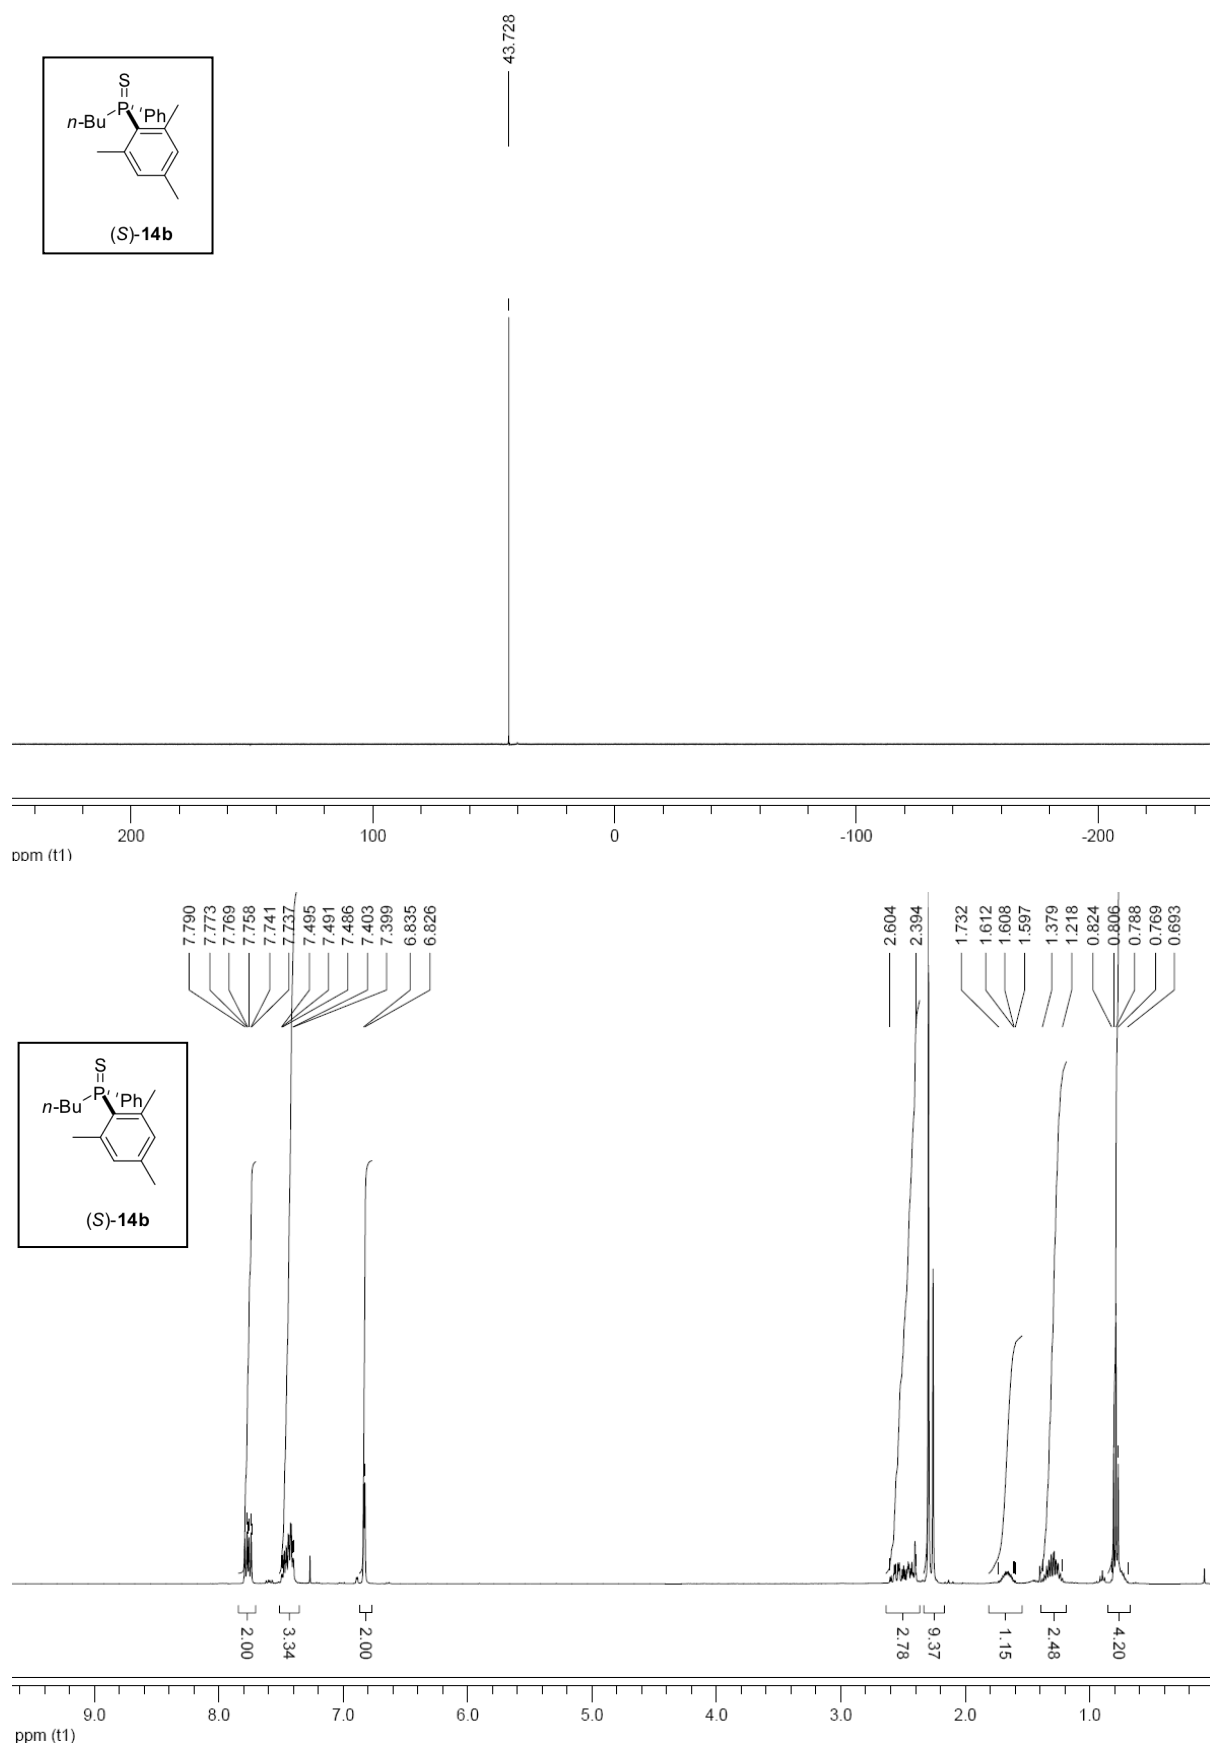

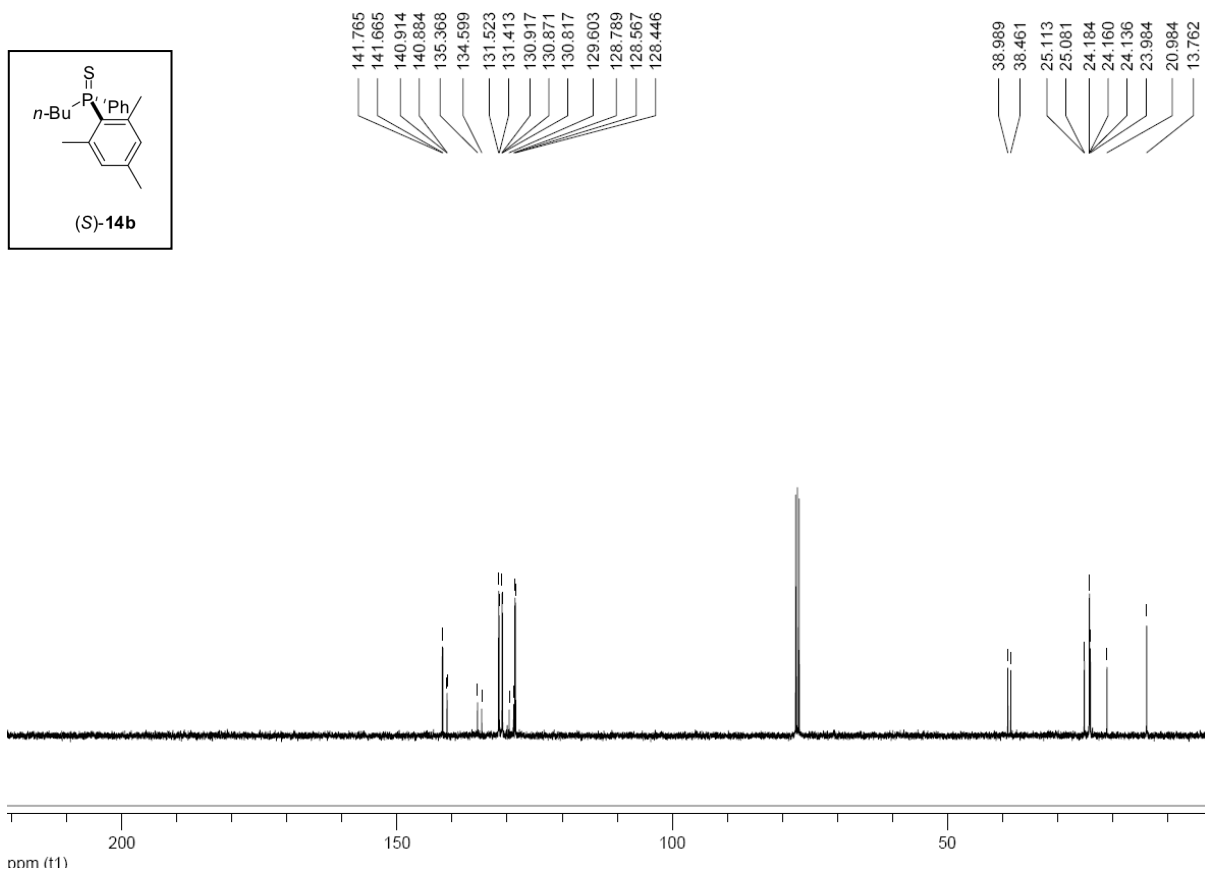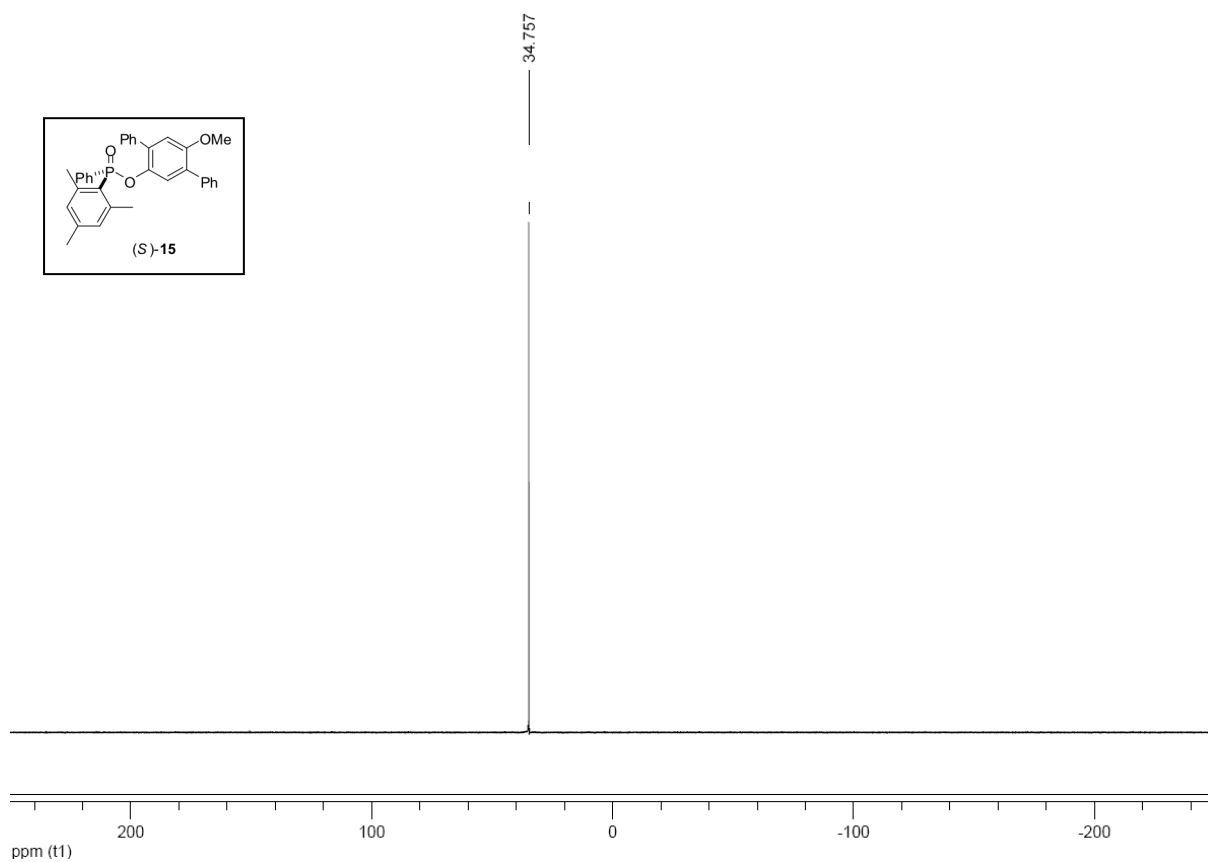

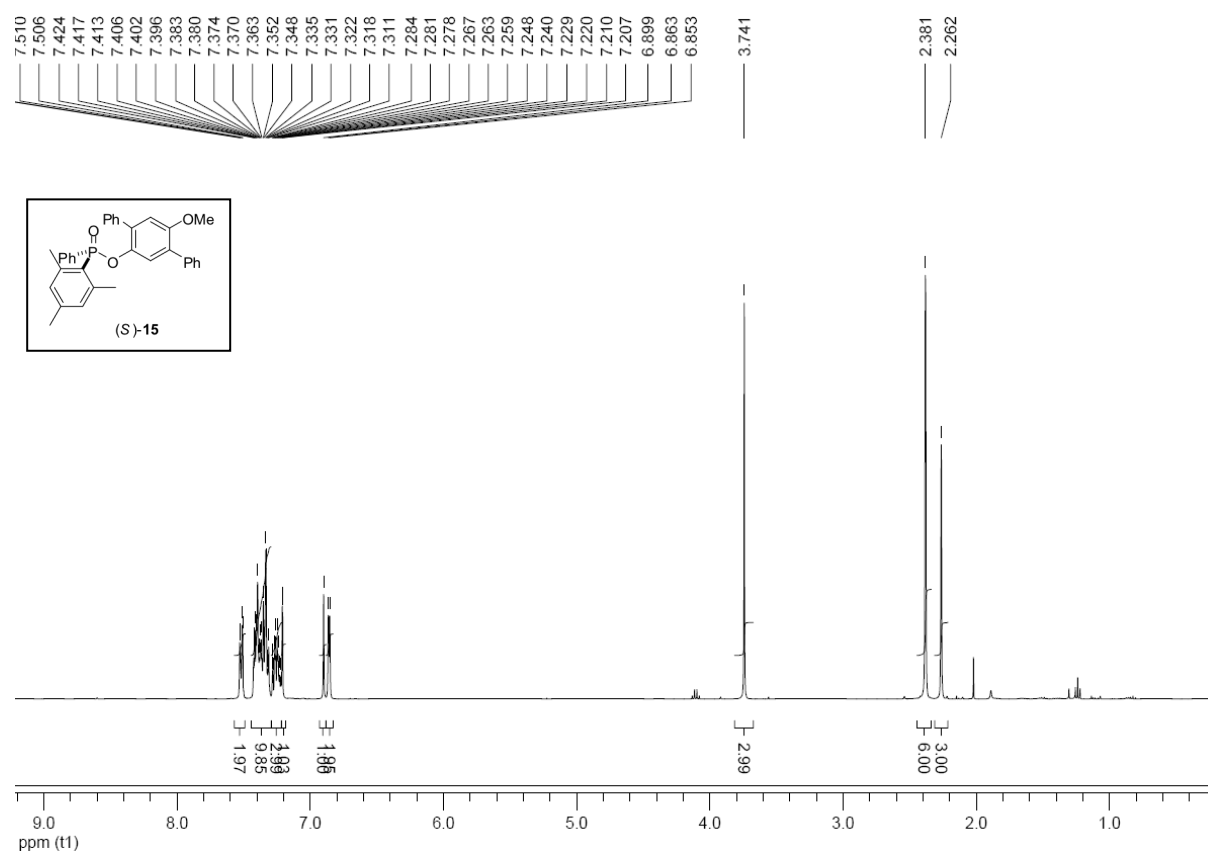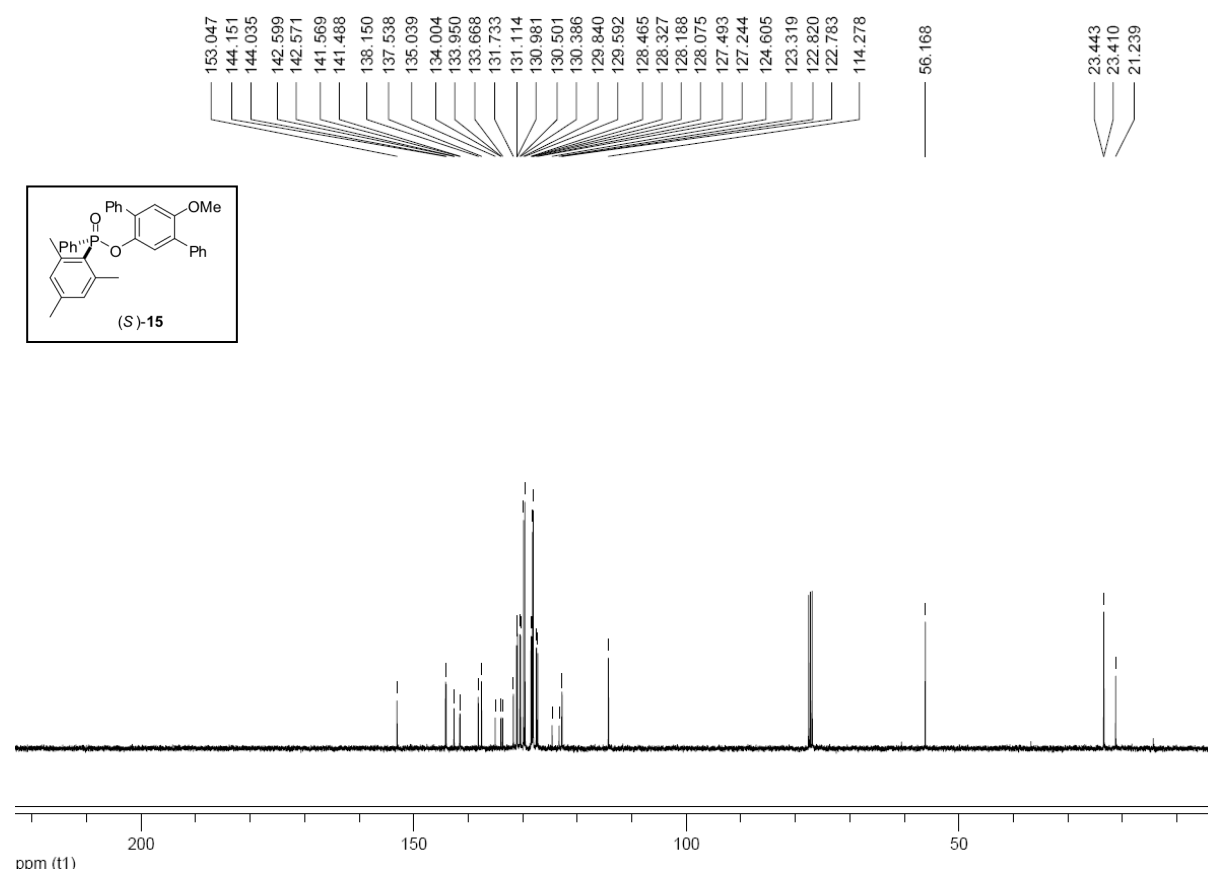



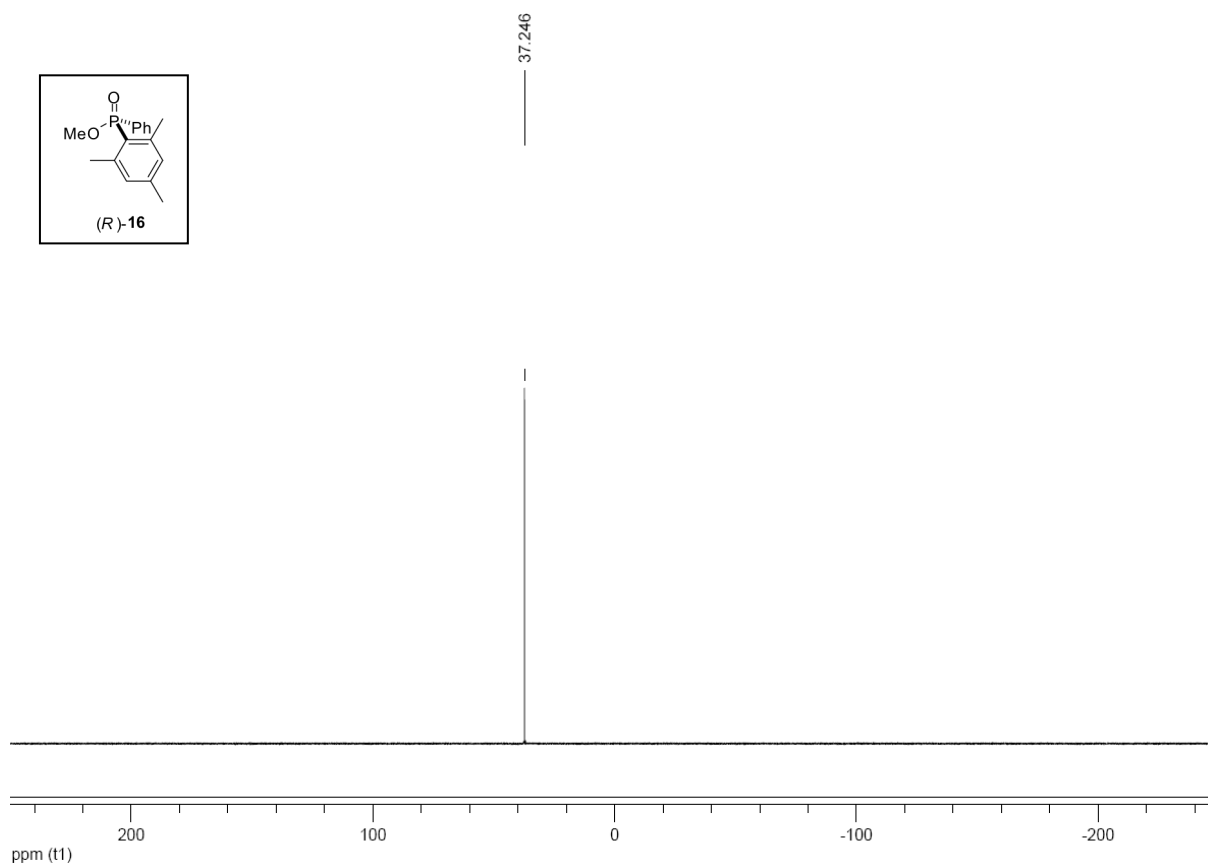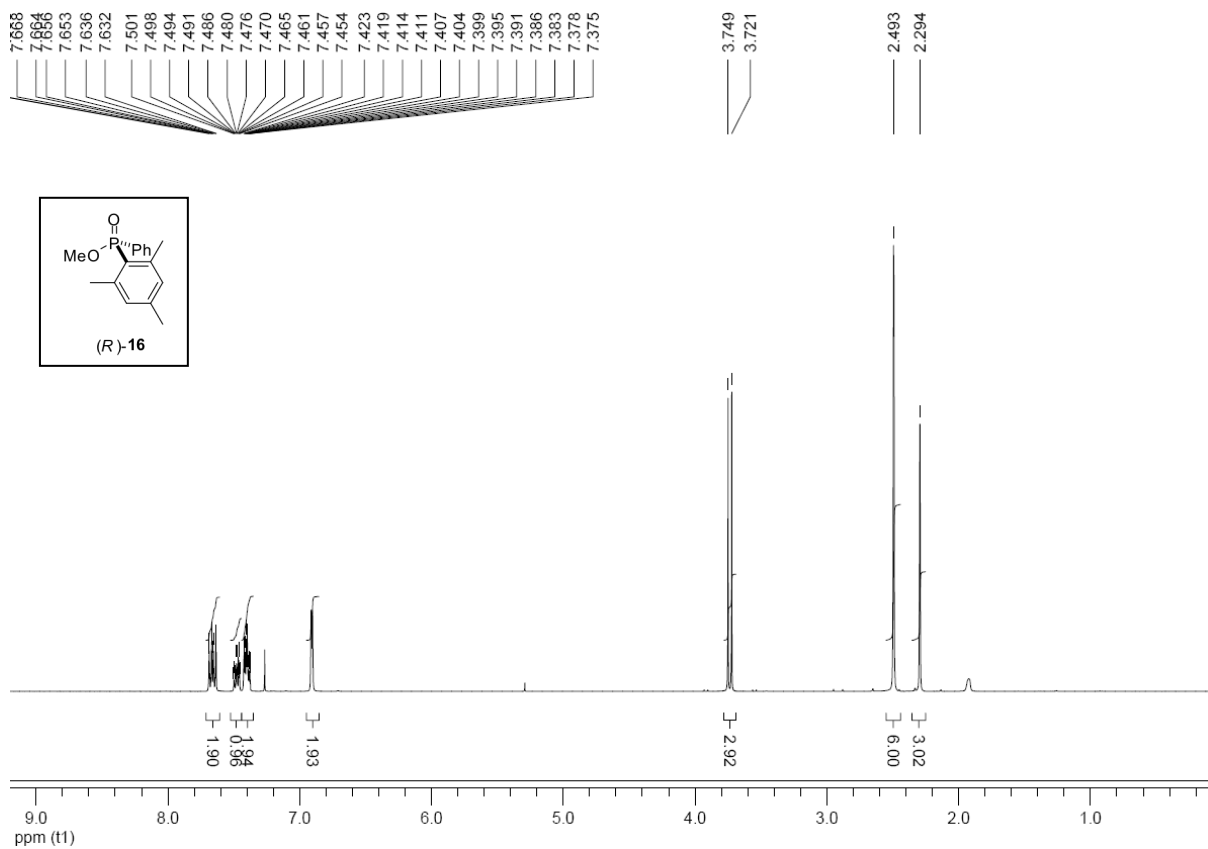

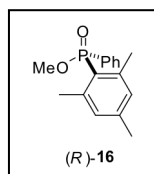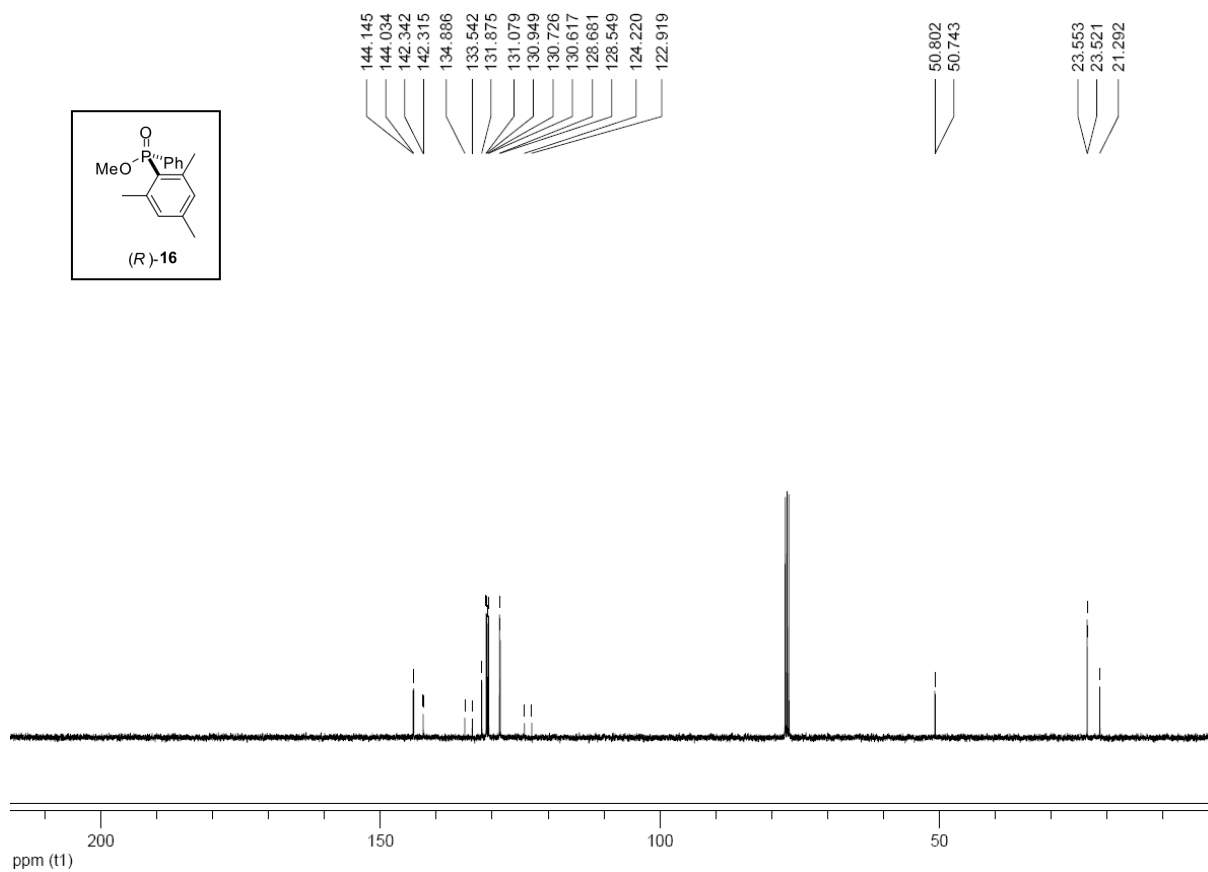

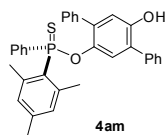

flow = 1.0 ml/m; IPA = 3%, Hexane = 97%; 280 nm; AD-H

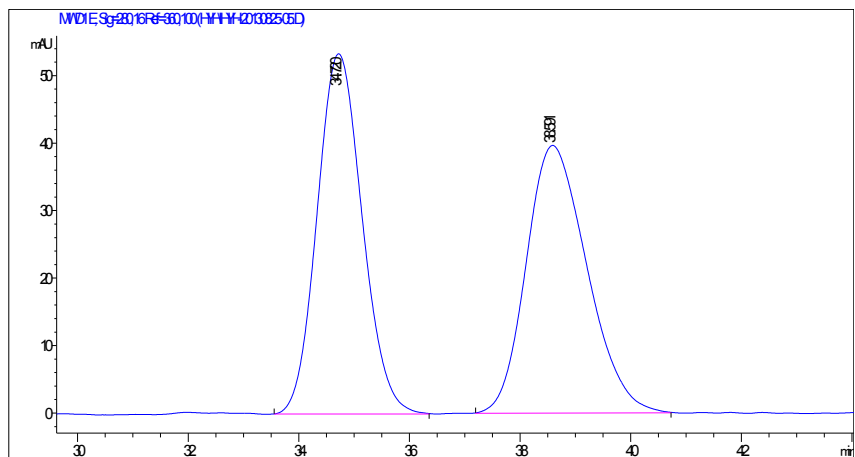

| # | Time   | Area   | Height | Area%  |
|---|--------|--------|--------|--------|
| 1 | 34.720 | 3022.2 | 53.4   | 50.015 |
| 2 | 38.591 | 3020.4 | 39.7   | 49.985 |

flow = 1.0 ml/m; IPA = 3%, Hexane = 97%; 280 nm; AD-H

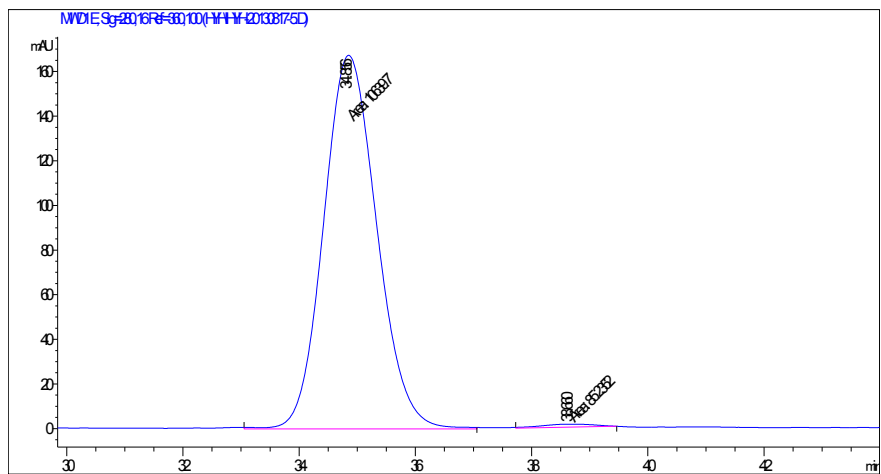

| # | Time   | Area    | Height | Area%  |
|---|--------|---------|--------|--------|
| 1 | 34.856 | 10639.7 | 167.4  | 99.205 |
| 2 | 38.660 | 85.2    | 1.3    | 0.795  |

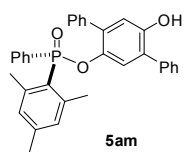

flow = 1.0 ml/m; IPA = 10%, Hexane = 90%; 280 nm; IC

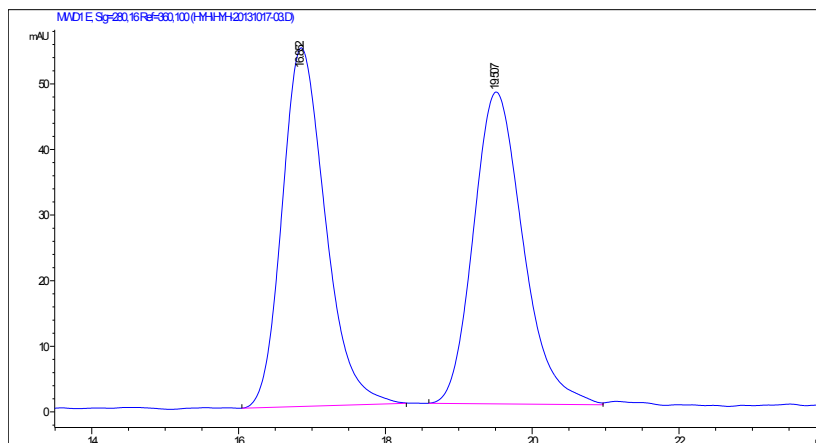

| # | Time   | Area   | Height | Area%  |
|---|--------|--------|--------|--------|
| 1 | 16.852 | 2237.4 | 54.7   | 50.089 |
| 2 | 19.507 | 2229.4 | 47.5   | 49.911 |

flow = 1.0 ml/m; IPA = 10%, Hexane = 90%; 280 nm; IC

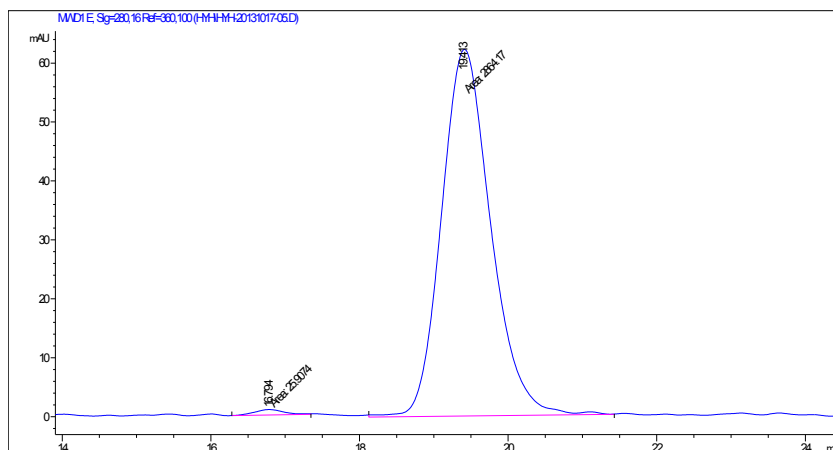

| # | Time   | Area   | Height | Area%  |
|---|--------|--------|--------|--------|
| 1 | 16.794 | 25.9   | 9.2E-1 | 0.896  |
| 2 | 19.413 | 2864.2 | 62.2   | 99.104 |

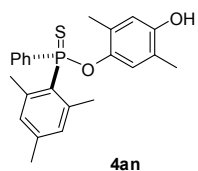

flow = 1.0 ml/m; IPA = 3%, Hexane = 97%; 280 nm; AD-H

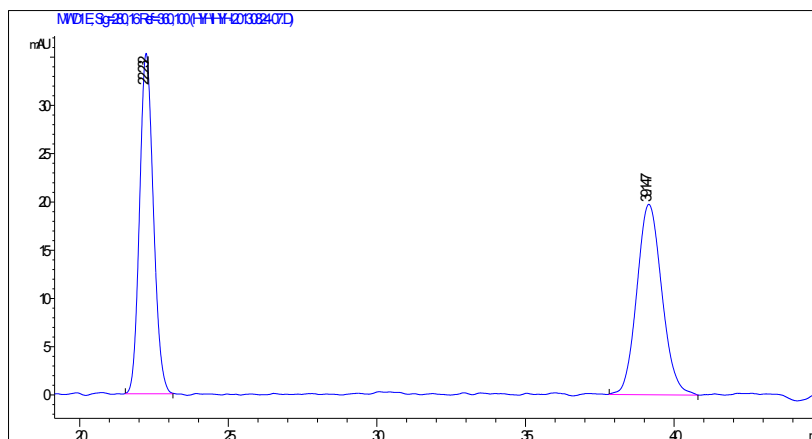

| # | Time   | Area   | Height | Area%  |
|---|--------|--------|--------|--------|
| 1 | 22.232 | 1139.5 | 35.3   | 49.666 |
| 2 | 39.147 | 1154.8 | 19.7   | 50.334 |

flow = 1.0 ml/m; IPA = 3%, Hexane = 97%; 280 nm; AD-H

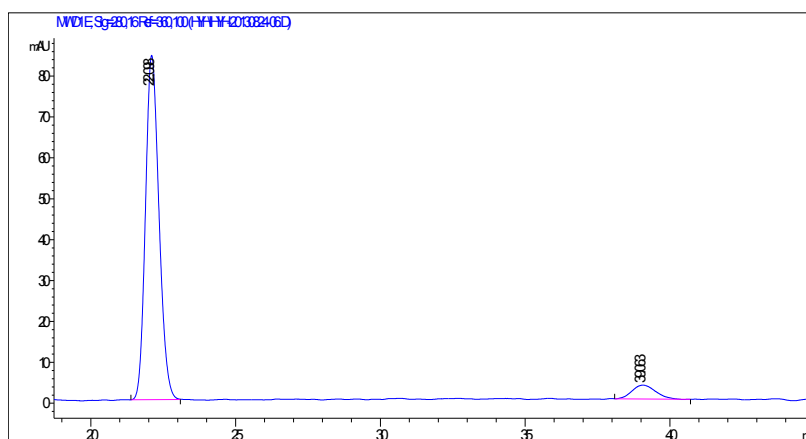

| # | Time   | Area   | Height | Area%  |
|---|--------|--------|--------|--------|
| 1 | 22.098 | 2727.2 | 84.2   | 93.521 |
| 2 | 39.063 | 188.9  | 3.4    | 6.479  |

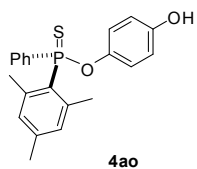

flow = 0.8 ml/m; IPA = 4%, Hexane = 96%; 280 nm; AD-H

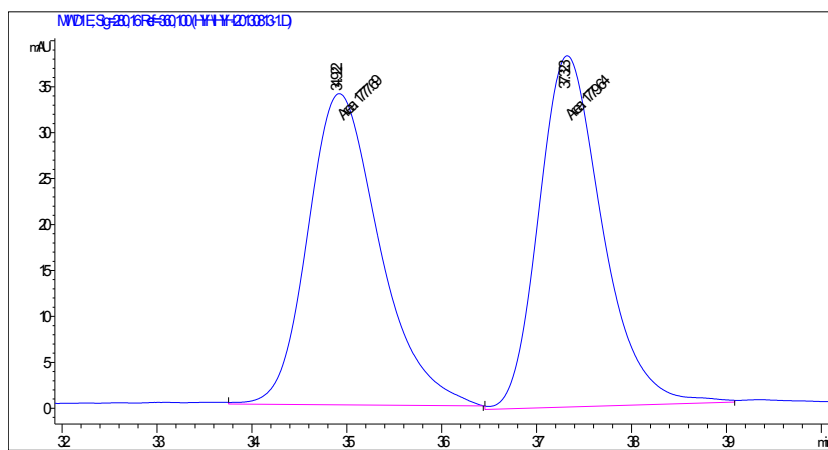

| # | Time   | Area   | Height | Area%  |
|---|--------|--------|--------|--------|
| 1 | 34.922 | 1777.7 | 33.9   | 49.973 |
| 2 | 37.323 | 1779.6 | 38.2   | 50.027 |

flow = 0.8 ml/m; IPA = 4%, Hexane = 96%; 280 nm; AD-H

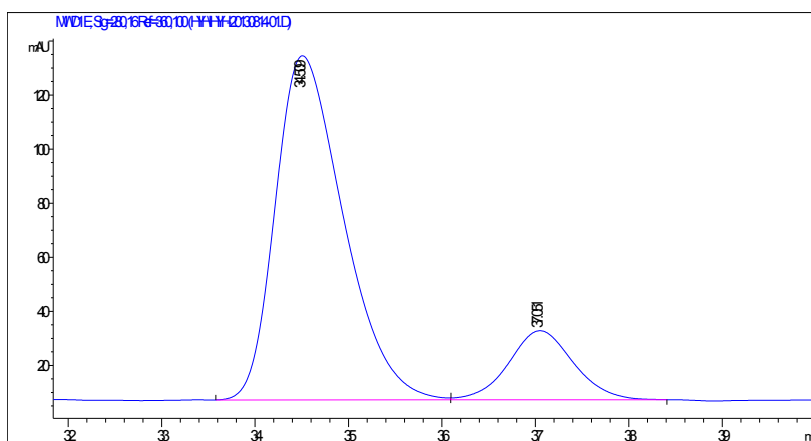

| # | Time   | Area   | Height | Area%  |
|---|--------|--------|--------|--------|
| 1 | 34.509 | 6431.1 | 127.2  | 83.873 |
| 2 | 37.051 | 1236.6 | 25.6   | 16.127 |

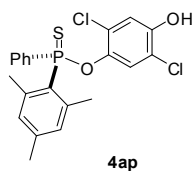

flow = 0.8 ml/m; IPA = 5%, Hexane = 95%; 280 nm; AD-H

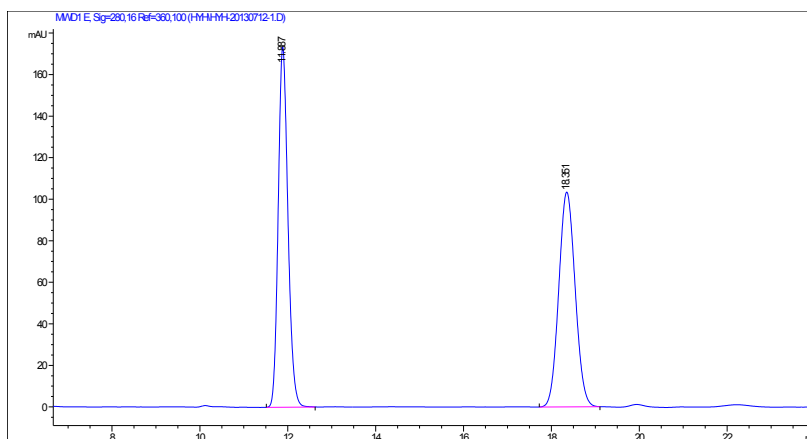

| # | Time   | Area   | Height | Area%  |
|---|--------|--------|--------|--------|
| 1 | 11.887 | 2665.5 | 173.5  | 49.903 |
| 2 | 18.351 | 2675.9 | 103.4  | 50.097 |

HYH-20130712-2 flow = 0.8 ml/m; IPA = 5%, Hexane = 95%; 280 nm; AD-H

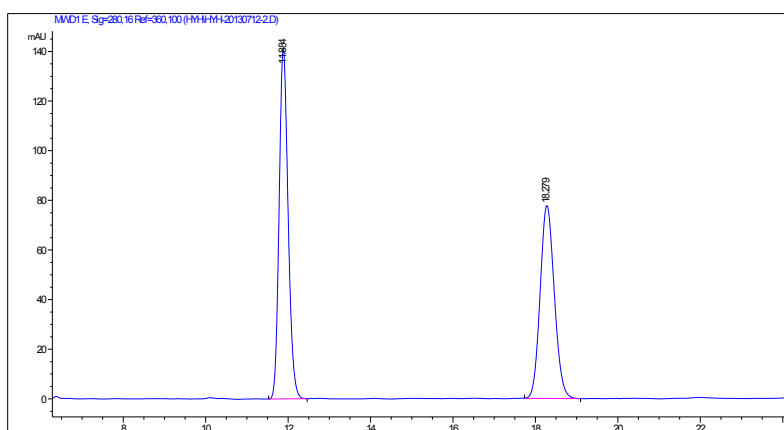

| # | Time   | Area   | Height | Area%  |
|---|--------|--------|--------|--------|
| 1 | 11.884 | 2131.5 | 141.2  | 53.434 |
| 2 | 18.279 | 1857.5 | 77.7   | 46.566 |

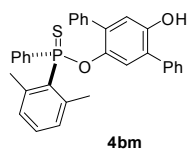

flow = 1.0 ml/m; IPA = 3%, Hexane = 97%; 280 nm; AD-H

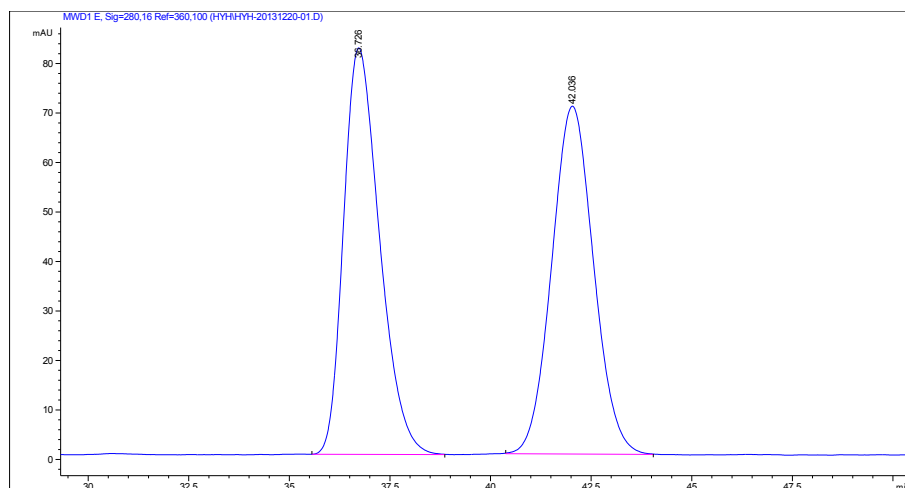

| # | Time   | Area   | Height | Area%  |
|---|--------|--------|--------|--------|
| 1 | 36.726 | 5103.2 | 82.2   | 50.076 |
| 2 | 42.036 | 5087.8 | 70.3   | 49.924 |

flow = 1.0 ml/m; IPA = 3%, Hexane = 97%; 280 nm; AD-H

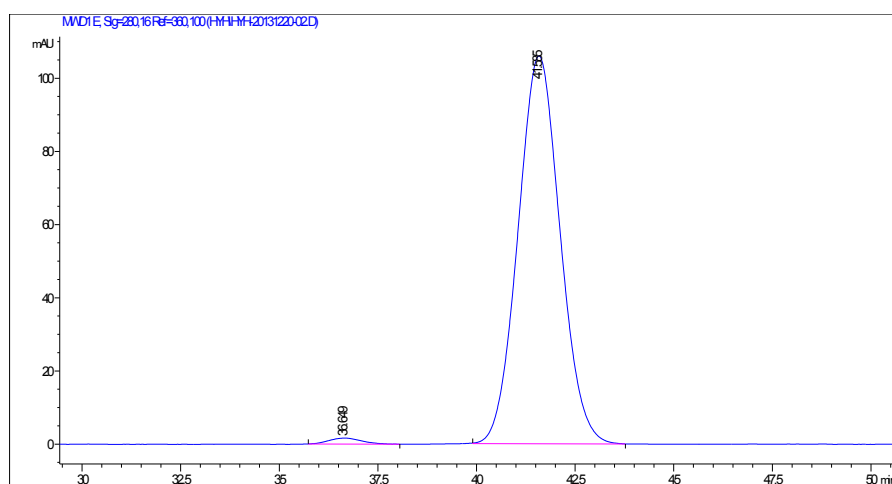

| # | Time   | Area   | Height | Area%  |
|---|--------|--------|--------|--------|
| 1 | 36.649 | 95.8   | 1.7    | 1.206  |
| 2 | 41.585 | 7847.8 | 106    | 98.794 |



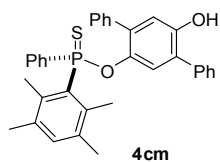

flow = 0.8 ml/m; IPA = 5%, Hexane = 95%; 280 nm; AD-H

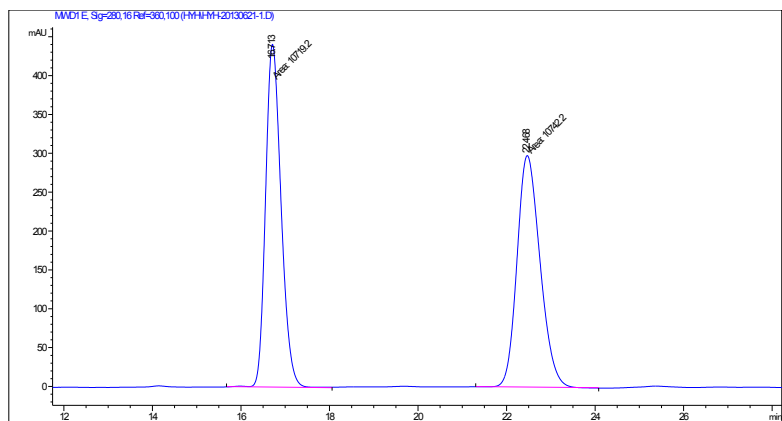

| # | Time   | Area    | Height | Area%  |
|---|--------|---------|--------|--------|
| 1 | 16.713 | 10719.2 | 441    | 49.947 |
| 2 | 22.468 | 10742.2 | 297.8  | 50.053 |

flow = 0.8 ml/m; IPA = 5%, Hexane = 95%; 280 nm; AD-H

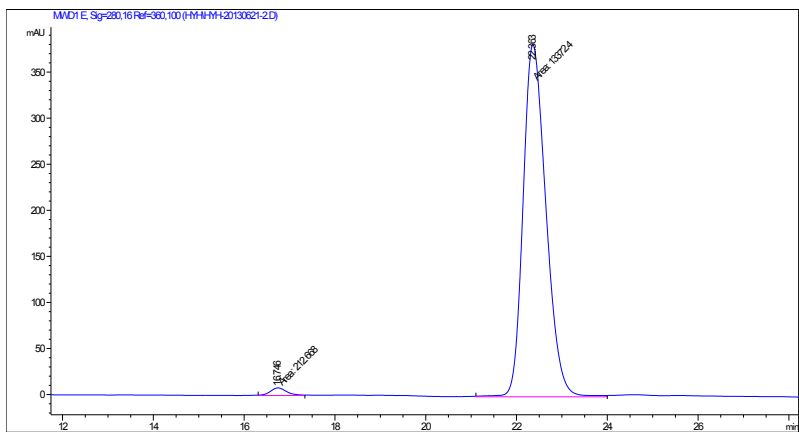

| # | Time   | Area    | Height | Area%  |
|---|--------|---------|--------|--------|
| 1 | 16.746 | 211.5   | 8.3    | 1.557  |
| 2 | 22.363 | 13372.4 | 382    | 98.443 |

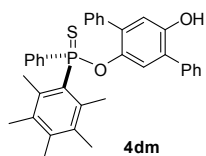

flow = 0.8 ml/m; IPA = 5%, Hexane = 95%; 280 nm; AD-H

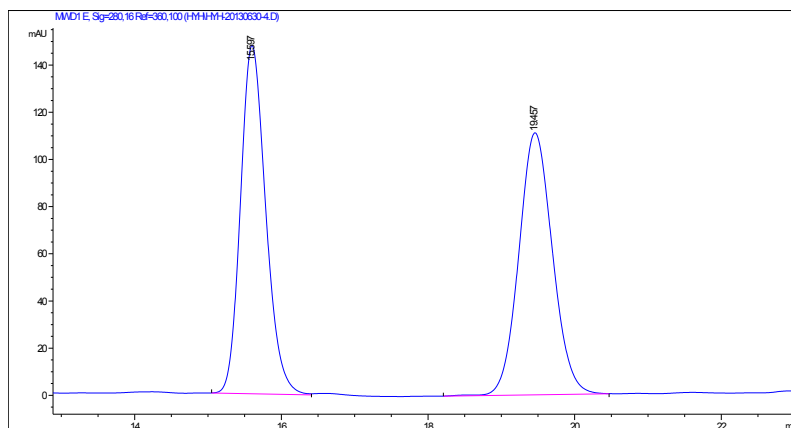

| # | Time   | Area   | Height | Area%  |
|---|--------|--------|--------|--------|
| 1 | 15.597 | 3529.7 | 147.6  | 49.920 |
| 2 | 19.457 | 3541.1 | 111.1  | 50.080 |

flow = 0.8 ml/m; IPA = 5%, Hexane = 95%; 280 nm; AD-H

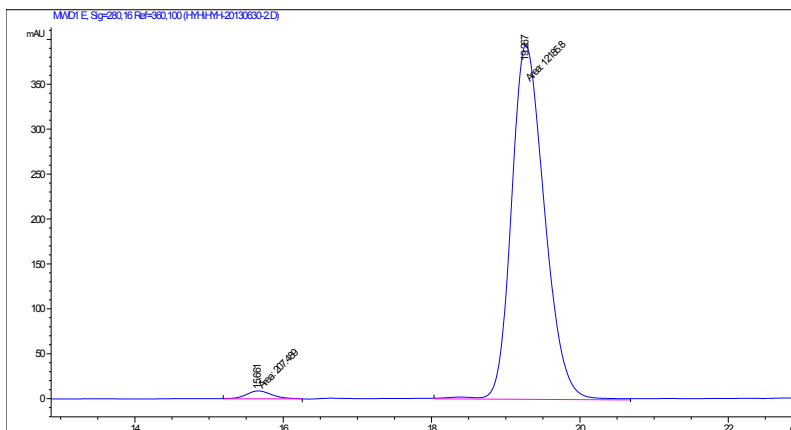

| # | Time   | Area    | Height | Area%  |
|---|--------|---------|--------|--------|
| 1 | 15.661 | 207.5   | 8.7    | 1.674  |
| 2 | 19.267 | 12185.8 | 394.4  | 98.326 |

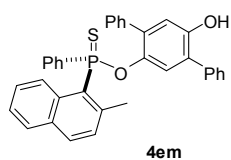

flow = 0.8 ml/m; IPA = 5%, Hexane = 95%; 280 nm; AD-H

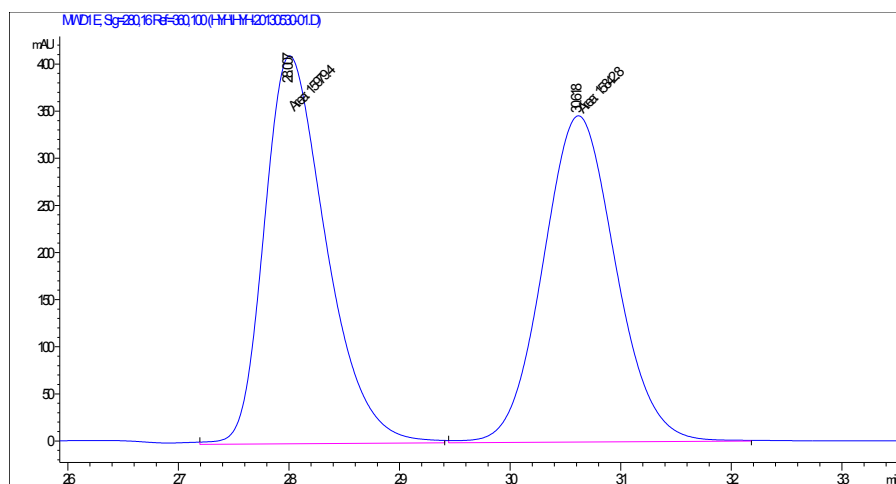

| # | Time   | Area    | Height | Area%  |
|---|--------|---------|--------|--------|
| 1 | 28.007 | 15979.4 | 411.8  | 50.215 |
| 2 | 30.618 | 15842.8 | 346.3  | 49.785 |

flow = 0.8 ml/m; IPA = 5%, Hexane = 95%; 280 nm; AD-H

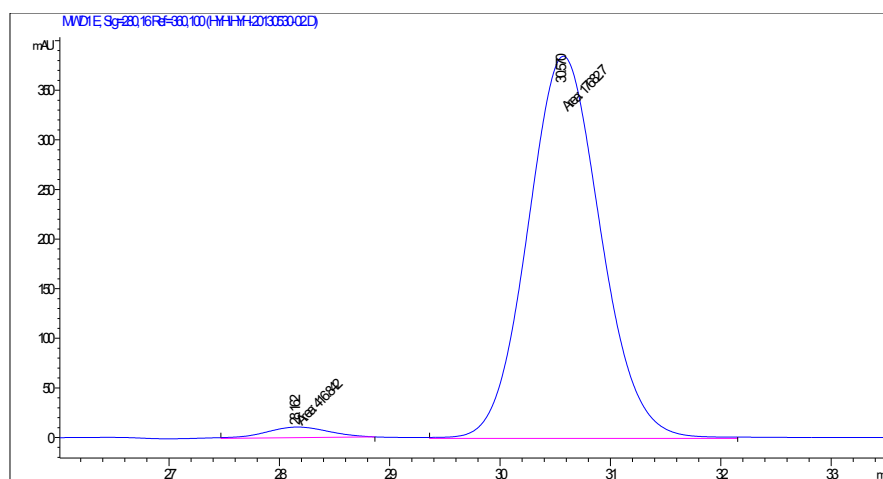

| # | Time   | Area    | Height | Area%  |
|---|--------|---------|--------|--------|
| 1 | 28.162 | 416.8   | 10.7   | 2.303  |
| 2 | 30.57  | 17682.7 | 385.3  | 97.697 |

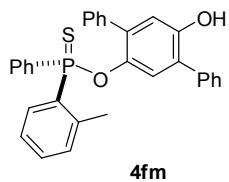

flow = 0.8 ml/m; IPA = 5%, Hexane = 95%; 280 nm; AD-H

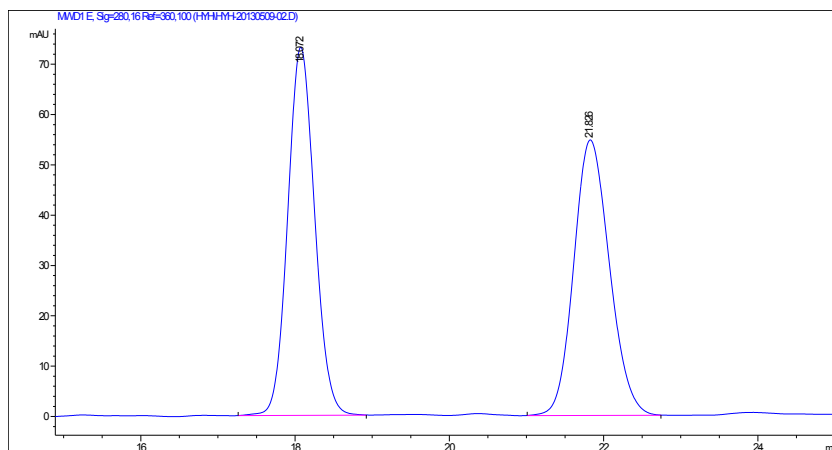

| # | Time   | Area   | Height | Area%  |
|---|--------|--------|--------|--------|
| 1 | 18.072 | 1774.5 | 73.2   | 50.181 |
| 2 | 21.826 | 1761.8 | 54.8   | 49.819 |

flow = 0.8 ml/m; IPA = 5%, Hexane = 95%; 280 nm; AD-H

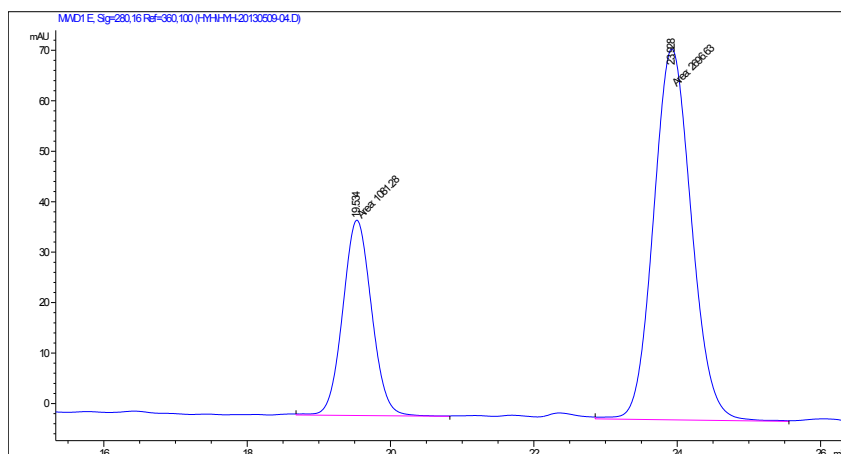

| # | Time   | Area   | Height | Area%  |
|---|--------|--------|--------|--------|
| 1 | 19.534 | 1081.3 | 38.7   | 28.621 |
| 2 | 23.928 | 2696.6 | 73.5   | 71.379 |

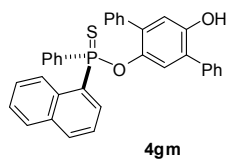

flow = 0.8 ml/m; IPA = 6%, Hexane = 94%; 280 nm; AD-H

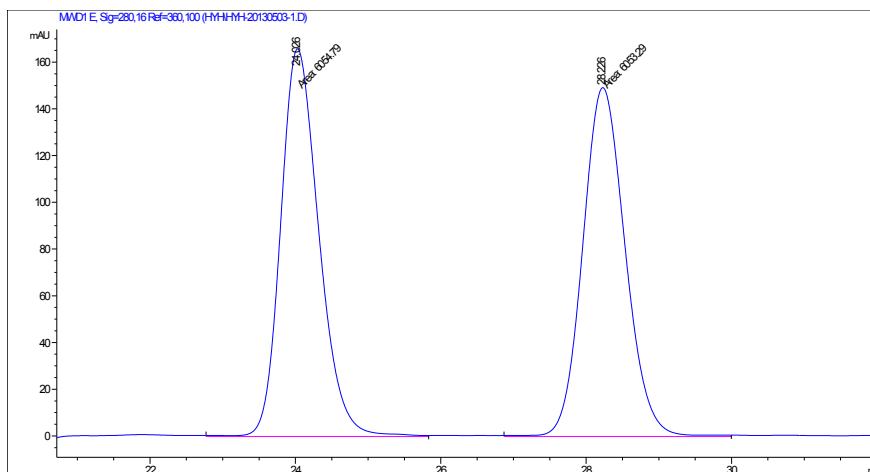

| # | Time   | Area   | Height | Area%  |
|---|--------|--------|--------|--------|
| 1 | 24.026 | 6054.8 | 165.9  | 50.006 |
| 2 | 28.226 | 6053.3 | 149.3  | 49.994 |

flow = 0.8 ml/m; IPA = 6%, Hexane = 94%; 280 nm; AD-H

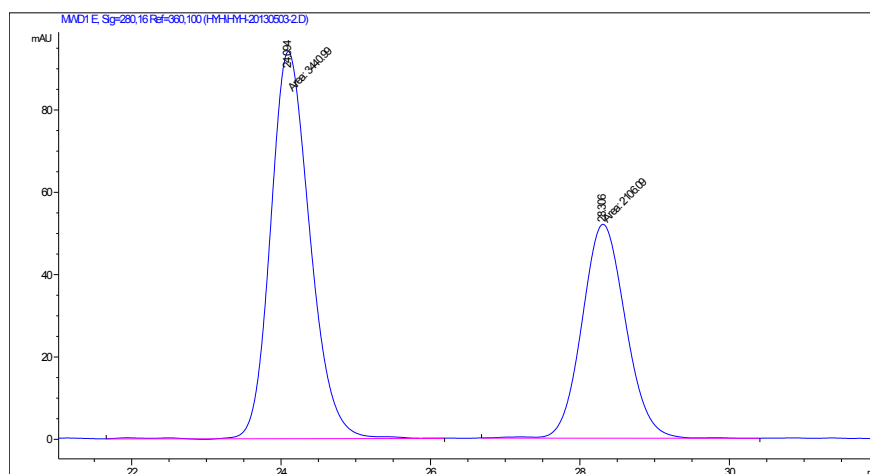

| # | Time   | Area   | Height | Area%  |
|---|--------|--------|--------|--------|
| 1 | 24.094 | 3441   | 94.1   | 62.032 |
| 2 | 28.306 | 2106.1 | 52     | 37.968 |

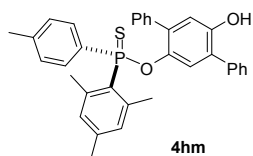

flow = 0.8 ml/m; IPA = 5%, Hexane = 95%; 280 nm; AD-H

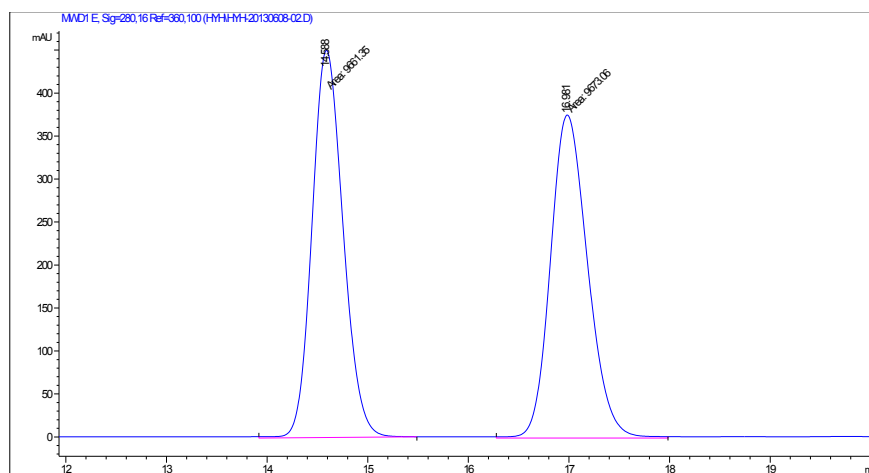

| # | Time   | Area   | Height | Area%  |
|---|--------|--------|--------|--------|
| 1 | 14.588 | 9661.4 | 450.6  | 49.970 |
| 2 | 16.981 | 9673.1 | 376    | 50.030 |

flow = 0.8 ml/m; IPA = 5%, Hexane = 95%; 280 nm; AD-H

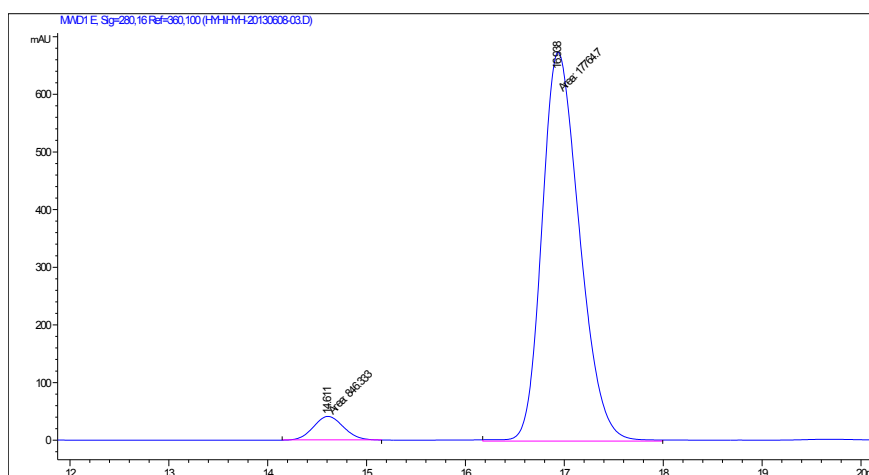

| # | Time   | Area    | Height | Area%  |
|---|--------|---------|--------|--------|
| 1 | 14.611 | 846.3   | 40.6   | 4.547  |
| 2 | 16.938 | 17764.7 | 674.3  | 95.453 |

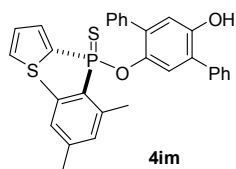

flow = 0.8 ml/m; IPA = 5%, Hexane = 95%; 280 nm; AD-H

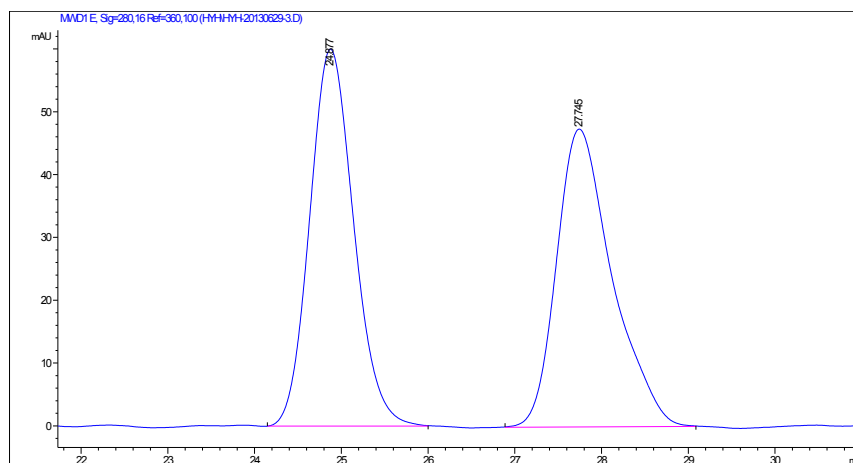

| # | Time   | Area   | Height | Area%  |
|---|--------|--------|--------|--------|
| 1 | 24.877 | 2114.9 | 60     | 50.092 |
| 2 | 27.745 | 2107.1 | 47.4   | 49.908 |

flow = 0.8 ml/m; IPA = 5%, Hexane = 95%; 280 nm; AD-H

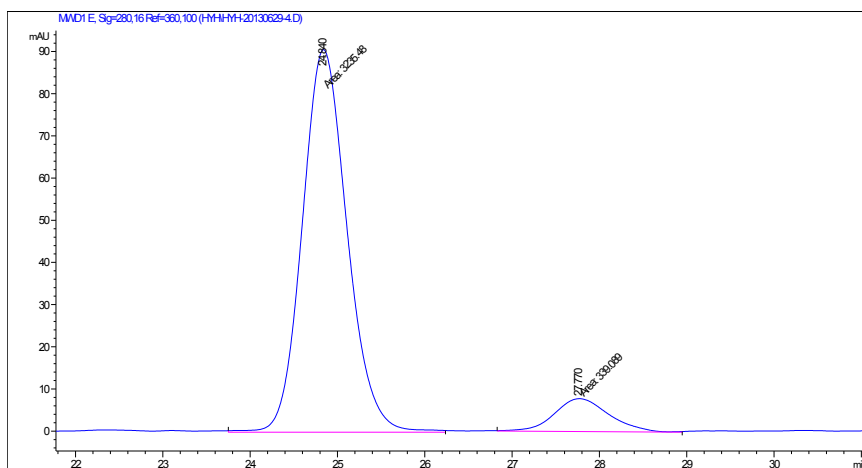

| # | Time  | Area   | Height | Area%  |
|---|-------|--------|--------|--------|
| 1 | 24.84 | 3235.5 | 90.7   | 90.514 |
| 2 | 27.77 | 339.1  | 7.8    | 9.486  |

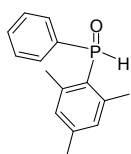

12 (at 63% conversion)

flow = 1.0 ml/m; IPA = 2%, Hexane = 98%; 280 nm; AD-H , racemic sample

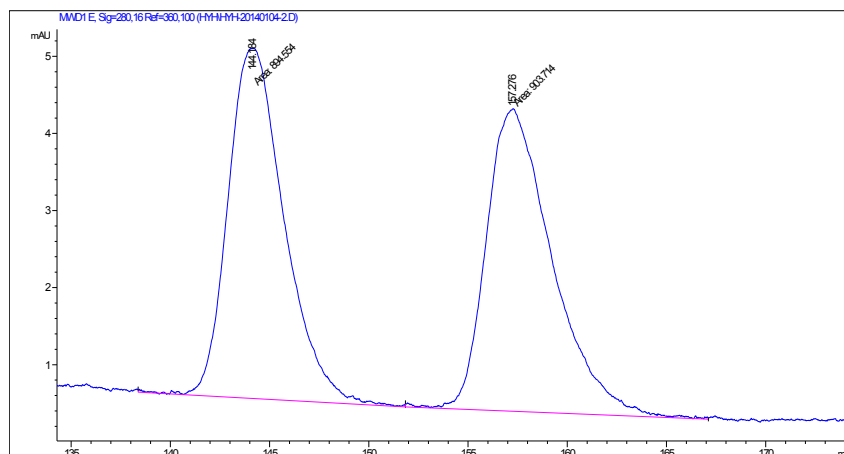

| # | Time    | Area  | Height | Area%  |
|---|---------|-------|--------|--------|
| 1 | 144.184 | 894.6 | 4.5    | 49.745 |
| 2 | 157.276 | 903.7 | 3.9    | 50.255 |

flow = 1.0 ml/m; IPA = 2%, Hexane = 98%; 280 nm; AD-H

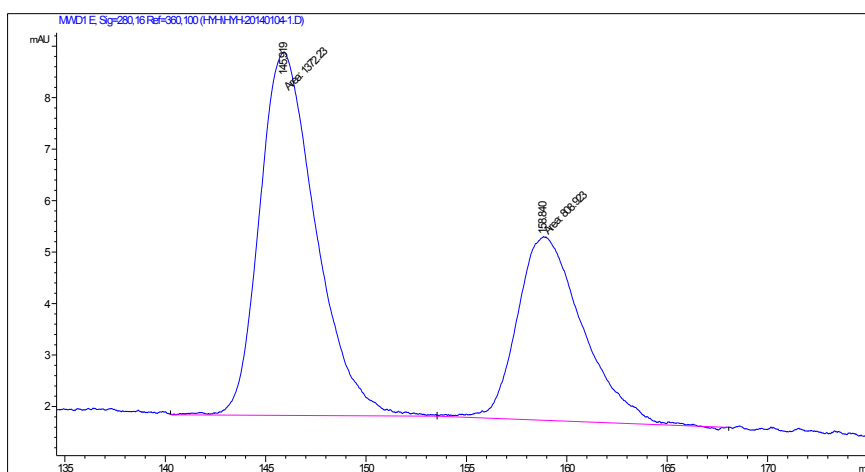

| # | Time    | Area   | Height | Area%  |
|---|---------|--------|--------|--------|
| 1 | 145.919 | 1372.2 | 7.1    | 62.913 |
| 2 | 158.84  | 808.9  | 3.6    | 37.087 |





12 (at 97% conversion)

flow = 1.0 ml/m; IPA = 2%, Hexane = 98%; 280 nm; AD-H, racemic sample

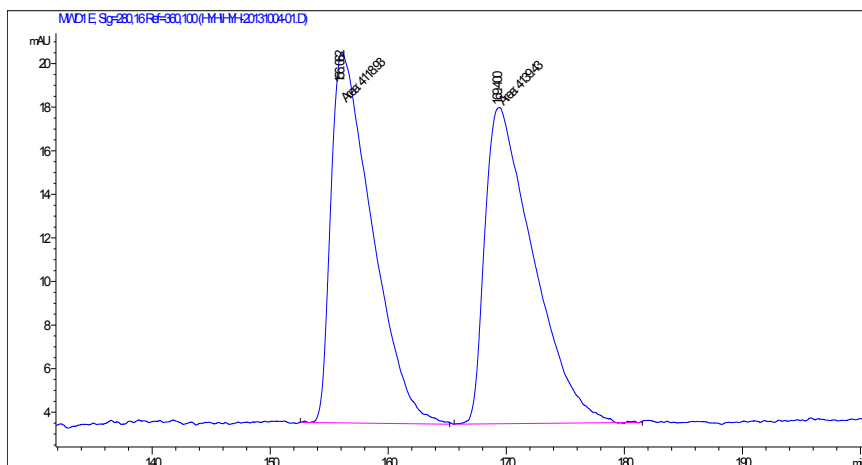

| # | Time    | Area   | Height | Area%  |
|---|---------|--------|--------|--------|
| 1 | 156.062 | 4118.9 | 17     | 49.876 |
| 2 | 169.4   | 4139.4 | 14.5   | 50.124 |

flow = 1.0 ml/m; IPA = 2%, Hexane = 98%; 250 nm; AD-H

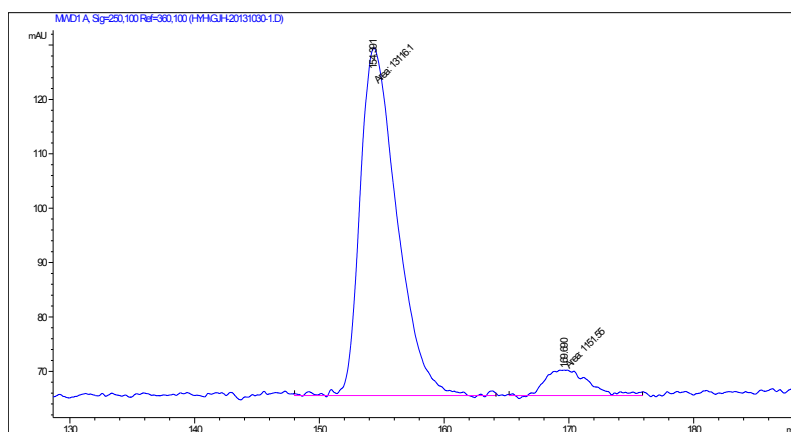

| # | Time    | Area    | Height | Area%  |
|---|---------|---------|--------|--------|
| 1 | 154.391 | 13116.1 | 63.9   | 91.929 |
| 2 | 169.69  | 1151.5  | 4.7    | 8.071  |

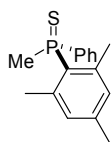

(S)-14a

flow = 1.0 ml/m; IPA = 2%, Hexane = 98%; 280 nm; AD-H

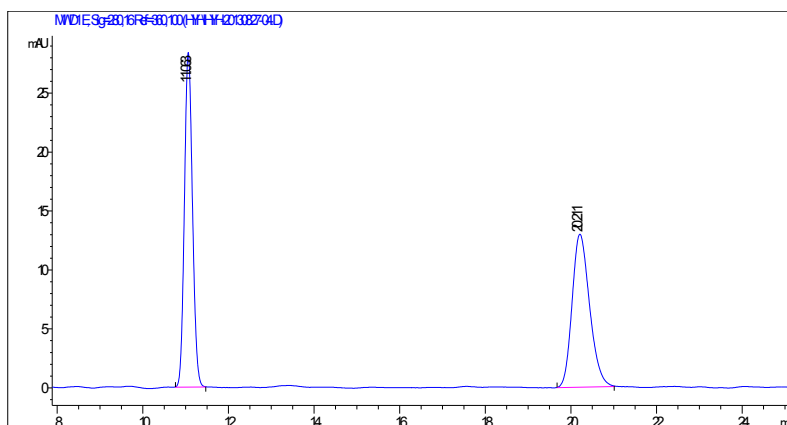

| # | Time   | Area  | Height | Area%  |
|---|--------|-------|--------|--------|
| 1 | 11.063 | 371.1 | 28.4   | 50.202 |
| 2 | 20.211 | 368.1 | 13     | 49.798 |

flow = 1.0 ml/m; IPA = 2%, Hexane = 98%; 280 nm; AD-H

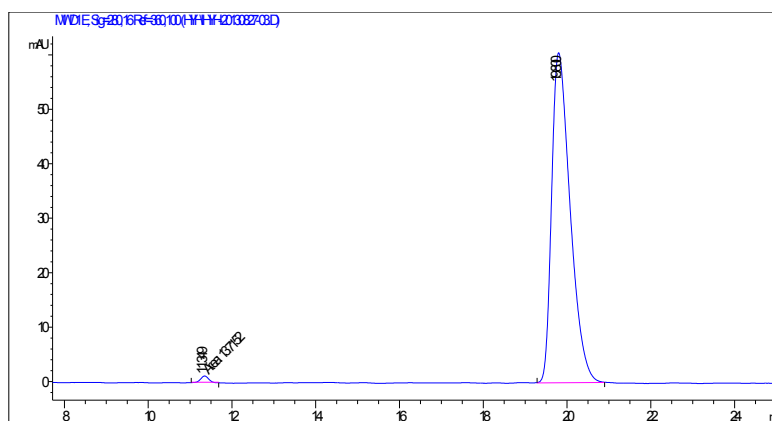

| # | Time   | Area   | Height | Area%  |
|---|--------|--------|--------|--------|
| 1 | 11.349 | 13.7   | 1.1    | 0.732  |
| 2 | 19.8   | 1858.9 | 60.6   | 99.268 |

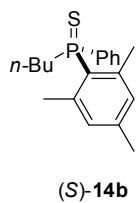

flow = 0.8 ml/m; IPA = 5%, Hexane = 95%; 280 nm; AD-H

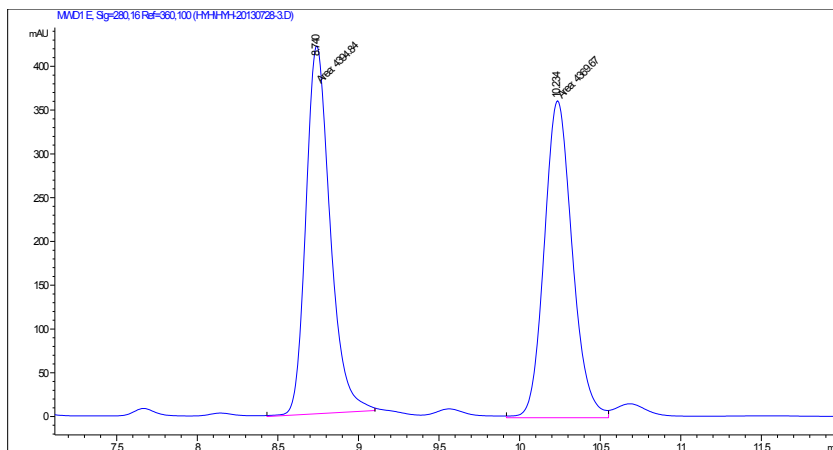

| # | Time   | Area   | Height | Area%  |
|---|--------|--------|--------|--------|
| 1 | 8.74   | 4394.8 | 420.4  | 50.144 |
| 2 | 10.234 | 4369.7 | 362.1  | 49.856 |

flow = 0.8 ml/m; IPA = 5%, Hexane = 95%; 280 nm; AD-H

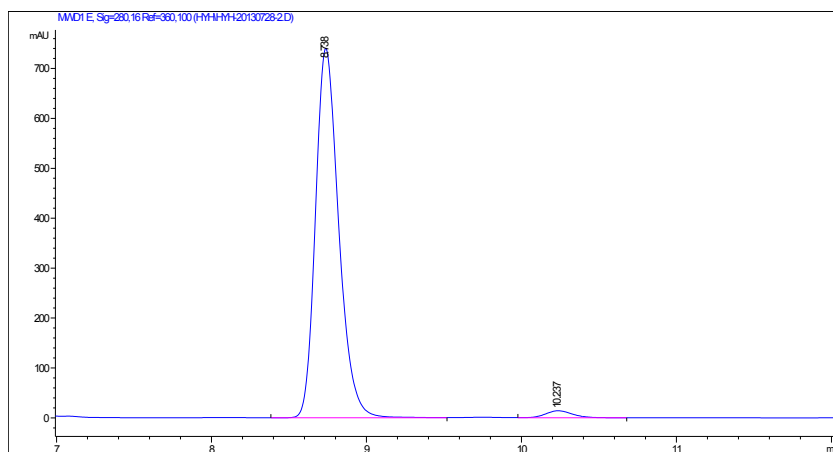

| # | Time   | Area   | Height | Area%  |
|---|--------|--------|--------|--------|
| 1 | 8.738  | 7708.7 | 740.5  | 97.807 |
| 2 | 10.237 | 172.8  | 14.1   | 2.193  |

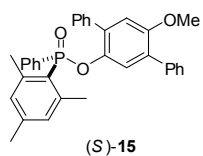

flow = 1.0 ml/m; IPA = 10%, Hexane = 90%; 280 nm; IC

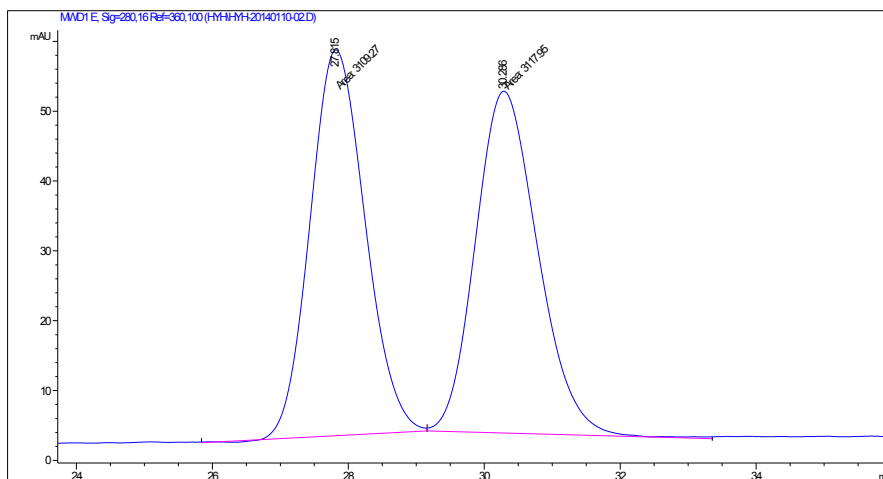

| # | Time   | Area   | Height | Area%  |
|---|--------|--------|--------|--------|
| 1 | 27.815 | 3109.3 | 55.2   | 49.930 |
| 2 | 30.286 | 3117.9 | 48.9   | 50.070 |

flow = 1.0 ml/m; IPA = 10%, Hexane = 90%; 280 nm; IC

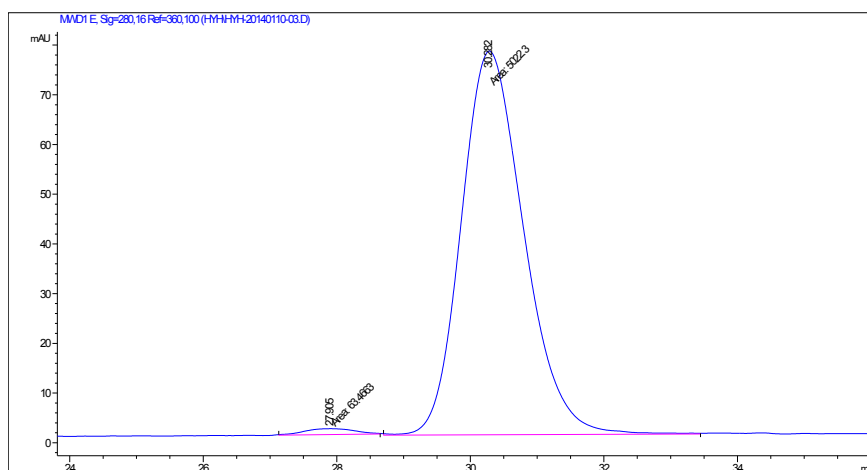

| # | Time   | Area   | Height | Area%  |
|---|--------|--------|--------|--------|
| 1 | 27.905 | 63.5   | 1.2    | 1.248  |
| 2 | 30.282 | 5022.3 | 77.2   | 98.752 |

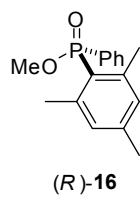

flow = 1.0 ml/m; IPA = 10%, Hexane = 90%; 280 nm; IC

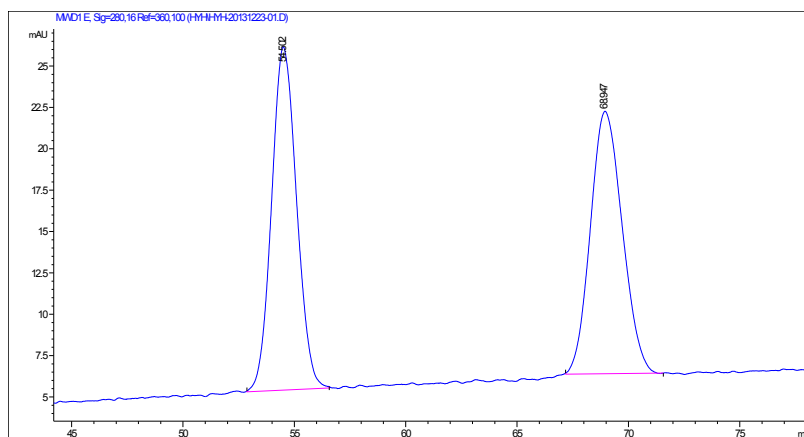

| # | Time   | Area   | Height | Area%  |
|---|--------|--------|--------|--------|
| 1 | 54.502 | 1618   | 20.8   | 50.664 |
| 2 | 68.947 | 1575.6 | 15.9   | 49.336 |

flow = 1.0 ml/m; IPA = 10%, Hexane = 90%; 280 nm; IC (conv = 92%)

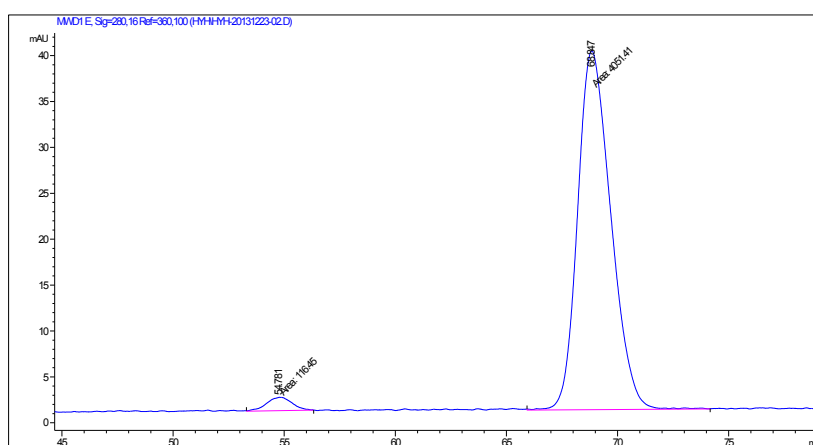

| # | Time   | Area   | Height | Area%  |
|---|--------|--------|--------|--------|
| 1 | 54.781 | 116.4  | 1.5    | 2.794  |
| 2 | 68.847 | 4051.4 | 39.1   | 97.206 |
